# Supplementary material for: Drug sensitivity and genome-wide analysis of two strains of Mycoplasma gallisepticum with different biofilm intensity
Source: Front Microbiol. 2023 Aug 9;14:1196747. doi: 10.3389/fmicb.2023.1196747 (PMC10445764; doi:10.3389/fmicb.2023.1196747)
Supplement: Supplementary file 1 [file Table_1.XLS]

Gene_ID	KO	KO_name	KO_des	EC	pathway_num	pathway
PROKKA_00004	K00134	GAPDH, gapA	glyceraldehyde 3-phosphate dehydrogenase	EC:1.2.1.12	6	ko01200,Carbon metabolism;ko01230,Biosynthesis of amino acids;ko00010,Glycolysis / Gluconeogenesis;ko00710,Carbon fixation in photosynthetic organisms;ko04066,HIF-1 signaling pathway;ko05010,Alzheimer's disease
PROKKA_00025	K00955	cysNC	bifunctional enzyme CysN/CysC [EC:2.7.7.4 2.7.1.25]	-	3	ko00920,Sulfur metabolism;ko00230,Purine metabolism;ko00450,Selenocompound metabolism
PROKKA_00040	K01867	WARS, trpS	tryptophanyl-tRNA synthetase	EC:6.1.1.2	1	ko00970,Aminoacyl-tRNA biosynthesis
PROKKA_00041	K01867	WARS, trpS	tryptophanyl-tRNA synthetase	EC:6.1.1.2	1	ko00970,Aminoacyl-tRNA biosynthesis
PROKKA_00043	K00858	ppnK, NADK	NAD+ kinase	EC:2.7.1.23	1	ko00760,Nicotinate and nicotinamide metabolism
PROKKA_00053	K04043	dnaK	molecular chaperone DnaK	-	2	ko03018,RNA degradation;ko05152,Tuberculosis
PROKKA_00054	K04043	dnaK	molecular chaperone DnaK	-	2	ko03018,RNA degradation;ko05152,Tuberculosis
PROKKA_00065	K02986	RP-S4, rpsD	small subunit ribosomal protein S4	-	1	ko03010,Ribosome
PROKKA_00066	K02950	RP-S12, MRPS12, rpsL	small subunit ribosomal protein S12	-	1	ko03010,Ribosome
PROKKA_00067	K02992	RP-S7, MRPS7, rpsG	small subunit ribosomal protein S7	-	1	ko03010,Ribosome
PROKKA_00068	K02992	RP-S7, MRPS7, rpsG	small subunit ribosomal protein S7	-	1	ko03010,Ribosome
PROKKA_00083	K02967	RP-S2, MRPS2, rpsB	small subunit ribosomal protein S2	-	1	ko03010,Ribosome
PROKKA_00084	K02967	RP-S2, MRPS2, rpsB	small subunit ribosomal protein S2	-	1	ko03010,Ribosome
PROKKA_00085	K02967	RP-S2, MRPS2, rpsB	small subunit ribosomal protein S2	-	1	ko03010,Ribosome
PROKKA_00091	K15580	oppA, mppA	oligopeptide transport system substrate-binding protein	-	2	ko02010,ABC transporters;ko00312,beta-Lactam resistance
PROKKA_00092	K15580	oppA, mppA	oligopeptide transport system substrate-binding protein	-	2	ko02010,ABC transporters;ko00312,beta-Lactam resistance
PROKKA_00093	K15580	oppA, mppA	oligopeptide transport system substrate-binding protein	-	2	ko02010,ABC transporters;ko00312,beta-Lactam resistance
PROKKA_00094	K15580	oppA, mppA	oligopeptide transport system substrate-binding protein	-	2	ko02010,ABC transporters;ko00312,beta-Lactam resistance
PROKKA_00095	K15581	oppB	oligopeptide transport system permease protein	-	2	ko02010,ABC transporters;ko00312,beta-Lactam resistance
PROKKA_00096	K15581	oppB	oligopeptide transport system permease protein	-	2	ko02010,ABC transporters;ko00312,beta-Lactam resistance
PROKKA_00099	K15582	oppC	oligopeptide transport system permease protein	-	2	ko02010,ABC transporters;ko00312,beta-Lactam resistance
PROKKA_00100	K15582	oppC	oligopeptide transport system permease protein	-	2	ko02010,ABC transporters;ko00312,beta-Lactam resistance
PROKKA_00101	K15582	oppC	oligopeptide transport system permease protein	-	2	ko02010,ABC transporters;ko00312,beta-Lactam resistance
PROKKA_00102	K15583	oppD	oligopeptide transport system ATP-binding protein	-	2	ko02010,ABC transporters;ko00312,beta-Lactam resistance
PROKKA_00103	K15583	oppD	oligopeptide transport system ATP-binding protein	-	2	ko02010,ABC transporters;ko00312,beta-Lactam resistance
PROKKA_00104	K15583	oppD	oligopeptide transport system ATP-binding protein	-	2	ko02010,ABC transporters;ko00312,beta-Lactam resistance
PROKKA_00105	K10823	oppF	oligopeptide transport system ATP-binding protein	-	2	ko02010,ABC transporters;ko00312,beta-Lactam resistance
PROKKA_00106	K10823	oppF	oligopeptide transport system ATP-binding protein	-	2	ko02010,ABC transporters;ko00312,beta-Lactam resistance
PROKKA_00111	K15581	oppB	oligopeptide transport system permease protein	-	2	ko02010,ABC transporters;ko00312,beta-Lactam resistance
PROKKA_00112	K15581	oppB	oligopeptide transport system permease protein	-	2	ko02010,ABC transporters;ko00312,beta-Lactam resistance
PROKKA_00113	K15582	oppC	oligopeptide transport system permease protein	-	2	ko02010,ABC transporters;ko00312,beta-Lactam resistance
PROKKA_00114	K15582	oppC	oligopeptide transport system permease protein	-	2	ko02010,ABC transporters;ko00312,beta-Lactam resistance
PROKKA_00115	K15582	oppC	oligopeptide transport system permease protein	-	2	ko02010,ABC transporters;ko00312,beta-Lactam resistance
PROKKA_00116	K15582	oppC	oligopeptide transport system permease protein	-	2	ko02010,ABC transporters;ko00312,beta-Lactam resistance
PROKKA_00117	K15583	oppD	oligopeptide transport system ATP-binding protein	-	2	ko02010,ABC transporters;ko00312,beta-Lactam resistance
PROKKA_00118	K15583	oppD	oligopeptide transport system ATP-binding protein	-	2	ko02010,ABC transporters;ko00312,beta-Lactam resistance
PROKKA_00119	K10823	oppF	oligopeptide transport system ATP-binding protein	-	2	ko02010,ABC transporters;ko00312,beta-Lactam resistance
PROKKA_00120	K10823	oppF	oligopeptide transport system ATP-binding protein	-	2	ko02010,ABC transporters;ko00312,beta-Lactam resistance
PROKKA_00121	K10823	oppF	oligopeptide transport system ATP-binding protein	-	2	ko02010,ABC transporters;ko00312,beta-Lactam resistance
PROKKA_00122	K10823	oppF	oligopeptide transport system ATP-binding protein	-	2	ko02010,ABC transporters;ko00312,beta-Lactam resistance
PROKKA_00135	K01689	ENO, eno	enolase	EC:4.2.1.11	6	ko01200,Carbon metabolism;ko01230,Biosynthesis of amino acids;ko00010,Glycolysis / Gluconeogenesis;ko00680,Methane metabolism;ko03018,RNA degradation;ko04066,HIF-1 signaling pathway
PROKKA_00136	K01689	ENO, eno	enolase	EC:4.2.1.11	6	ko01200,Carbon metabolism;ko01230,Biosynthesis of amino acids;ko00010,Glycolysis / Gluconeogenesis;ko00680,Methane metabolism;ko03018,RNA degradation;ko04066,HIF-1 signaling pathway
PROKKA_00137	K01689	ENO, eno	enolase	EC:4.2.1.11	6	ko01200,Carbon metabolism;ko01230,Biosynthesis of amino acids;ko00010,Glycolysis / Gluconeogenesis;ko00680,Methane metabolism;ko03018,RNA degradation;ko04066,HIF-1 signaling pathway
PROKKA_00138	K05592	deaD	ATP-dependent RNA helicase DeaD	EC:3.6.4.13	1	ko03018,RNA degradation
PROKKA_00149	K03151	thiI	thiamine biosynthesis protein ThiI	-	2	ko00730,Thiamine metabolism;ko04122,Sulfur relay system
PROKKA_00157	K03621	plsX	glycerol-3-phosphate acyltransferase PlsX	EC:2.3.1.15	2	ko00561,Glycerolipid metabolism;ko00564,Glycerophospholipid metabolism
PROKKA_00158	K03621	plsX	glycerol-3-phosphate acyltransferase PlsX	EC:2.3.1.15	2	ko00561,Glycerolipid metabolism;ko00564,Glycerophospholipid metabolism
PROKKA_00161	K11907	vasG, clpV	type VI secretion system protein VasG	-	1	ko03070,Bacterial secretion system
PROKKA_00163	K11907	vasG, clpV	type VI secretion system protein VasG	-	1	ko03070,Bacterial secretion system
PROKKA_00174	K00925	ackA	acetate kinase	EC:2.7.2.1	6	ko01200,Carbon metabolism;ko00620,Pyruvate metabolism;ko00640,Propanoate metabolism;ko00720,Carbon fixation pathways in prokaryotes;ko00680,Methane metabolism;ko00430,Taurine and hypotaurine metabolism
PROKKA_00175	K00925	ackA	acetate kinase	EC:2.7.2.1	6	ko01200,Carbon metabolism;ko00620,Pyruvate metabolism;ko00640,Propanoate metabolism;ko00720,Carbon fixation pathways in prokaryotes;ko00680,Methane metabolism;ko00430,Taurine and hypotaurine metabolism
PROKKA_00176	K00925	ackA	acetate kinase	EC:2.7.2.1	6	ko01200,Carbon metabolism;ko00620,Pyruvate metabolism;ko00640,Propanoate metabolism;ko00720,Carbon fixation pathways in prokaryotes;ko00680,Methane metabolism;ko00430,Taurine and hypotaurine metabolism
PROKKA_00178	K03885	ndh	NADH dehydrogenase	EC:1.6.99.3	1	ko00190,Oxidative phosphorylation
PROKKA_00180	K00161	PDHA, pdhA	pyruvate dehydrogenase E1 component subunit alpha	EC:1.2.4.1	5	ko01200,Carbon metabolism;ko00010,Glycolysis / Gluconeogenesis;ko00020,Citrate cycle (TCA cycle);ko00620,Pyruvate metabolism;ko04066,HIF-1 signaling pathway
PROKKA_00181	K00161	PDHA, pdhA	pyruvate dehydrogenase E1 component subunit alpha	EC:1.2.4.1	5	ko01200,Carbon metabolism;ko00010,Glycolysis / Gluconeogenesis;ko00020,Citrate cycle (TCA cycle);ko00620,Pyruvate metabolism;ko04066,HIF-1 signaling pathway
PROKKA_00182	K00161	PDHA, pdhA	pyruvate dehydrogenase E1 component subunit alpha	EC:1.2.4.1	5	ko01200,Carbon metabolism;ko00010,Glycolysis / Gluconeogenesis;ko00020,Citrate cycle (TCA cycle);ko00620,Pyruvate metabolism;ko04066,HIF-1 signaling pathway
PROKKA_00183	K00162	PDHB, pdhB	pyruvate dehydrogenase E1 component subunit beta	EC:1.2.4.1	5	ko01200,Carbon metabolism;ko00010,Glycolysis / Gluconeogenesis;ko00020,Citrate cycle (TCA cycle);ko00620,Pyruvate metabolism;ko04066,HIF-1 signaling pathway
PROKKA_00184	K00162	PDHB, pdhB	pyruvate dehydrogenase E1 component subunit beta	EC:1.2.4.1	5	ko01200,Carbon metabolism;ko00010,Glycolysis / Gluconeogenesis;ko00020,Citrate cycle (TCA cycle);ko00620,Pyruvate metabolism;ko04066,HIF-1 signaling pathway
PROKKA_00185	K00162	PDHB, pdhB	pyruvate dehydrogenase E1 component subunit beta	EC:1.2.4.1	5	ko01200,Carbon metabolism;ko00010,Glycolysis / Gluconeogenesis;ko00020,Citrate cycle (TCA cycle);ko00620,Pyruvate metabolism;ko04066,HIF-1 signaling pathway
PROKKA_00186	K00627	DLAT, aceF, pdhC	pyruvate dehydrogenase E2 component (dihydrolipoamide acetyltransferase)	EC:2.3.1.12	4	ko01200,Carbon metabolism;ko00010,Glycolysis / Gluconeogenesis;ko00020,Citrate cycle (TCA cycle);ko00620,Pyruvate metabolism
PROKKA_00187	K00382	DLD, lpd, pdhD	dihydrolipoamide dehydrogenase	EC:1.8.1.4	6	ko01200,Carbon metabolism;ko00010,Glycolysis / Gluconeogenesis;ko00020,Citrate cycle (TCA cycle);ko00620,Pyruvate metabolism;ko00260,Glycine, serine and threonine metabolism;ko00280,Valine, leucine and isoleucine degradation
PROKKA_00188	K00382	DLD, lpd, pdhD	dihydrolipoamide dehydrogenase	EC:1.8.1.4	6	ko01200,Carbon metabolism;ko00010,Glycolysis / Gluconeogenesis;ko00020,Citrate cycle (TCA cycle);ko00620,Pyruvate metabolism;ko00260,Glycine, serine and threonine metabolism;ko00280,Valine, leucine and isoleucine degradation
PROKKA_00189	K03800	lplA	lipoate-protein ligase A	EC:2.7.7.63	1	ko00785,Lipoic acid metabolism
PROKKA_00191	K00850	pfkA, PFK	6-phosphofructokinase 1	EC:2.7.1.11	7	ko01200,Carbon metabolism;ko01230,Biosynthesis of amino acids;ko00010,Glycolysis / Gluconeogenesis;ko00030,Pentose phosphate pathway;ko00051,Fructose and mannose metabolism;ko00052,Galactose metabolism;ko00680,Methane metabolism
PROKKA_00192	K00873	PK, pyk	pyruvate kinase	EC:2.7.1.40	7	ko01200,Carbon metabolism;ko01230,Biosynthesis of amino acids;ko00010,Glycolysis / Gluconeogenesis;ko00620,Pyruvate metabolism;ko00230,Purine metabolism;ko05203,Viral carcinogenesis;ko04930,Type II diabetes mellitus
PROKKA_00194	K04077	groEL, HSPD1	chaperonin GroEL	-	4	ko03018,RNA degradation;ko04940,Type I diabetes mellitus;ko05134,Legionellosis;ko05152,Tuberculosis
PROKKA_00204	K03553	recA	recombination protein RecA	-	1	ko03440,Homologous recombination
PROKKA_00209	K11072	potA	spermidine/putrescine transport system ATP-binding protein	EC:3.6.3.31	1	ko02010,ABC transporters
PROKKA_00210	K11072	potA	spermidine/putrescine transport system ATP-binding protein	EC:3.6.3.31	1	ko02010,ABC transporters
PROKKA_00211	K11072	potA	spermidine/putrescine transport system ATP-binding protein	EC:3.6.3.31	1	ko02010,ABC transporters
PROKKA_00212	K11071	potB	spermidine/putrescine transport system permease protein	-	1	ko02010,ABC transporters
PROKKA_00213	K11071	potB	spermidine/putrescine transport system permease protein	-	1	ko02010,ABC transporters
PROKKA_00214	K11070	potC	spermidine/putrescine transport system permease protein	-	1	ko02010,ABC transporters
PROKKA_00215	K11070	potC	spermidine/putrescine transport system permease protein	-	1	ko02010,ABC transporters
PROKKA_00216	K11069	potD	spermidine/putrescine transport system substrate-binding protein	-	1	ko02010,ABC transporters
PROKKA_00217	K11069	potD	spermidine/putrescine transport system substrate-binding protein	-	1	ko02010,ABC transporters
PROKKA_00219	K00789	metK	S-adenosylmethionine synthetase	EC:2.5.1.6	2	ko01230,Biosynthesis of amino acids;ko00270,Cysteine and methionine metabolism
PROKKA_00220	K00789	metK	S-adenosylmethionine synthetase	EC:2.5.1.6	2	ko01230,Biosynthesis of amino acids;ko00270,Cysteine and methionine metabolism
PROKKA_00224	K00384	E1.8.1.9, trxB	thioredoxin reductase (NADPH)	EC:1.8.1.9	2	ko00240,Pyrimidine metabolism;ko00450,Selenocompound metabolism
PROKKA_00226	K03075	secG	preprotein translocase subunit SecG	-	2	ko03060,Protein export;ko03070,Bacterial secretion system
PROKKA_00227	K12573	rnr, vacB	ribonuclease R	EC:3.1.-.-	1	ko03018,RNA degradation
PROKKA_00228	K12573	rnr, vacB	ribonuclease R	EC:3.1.-.-	1	ko03018,RNA degradation
PROKKA_00229	K12573	rnr, vacB	ribonuclease R	EC:3.1.-.-	1	ko03018,RNA degradation
PROKKA_00230	K12573	rnr, vacB	ribonuclease R	EC:3.1.-.-	1	ko03018,RNA degradation
PROKKA_00240	K01255	CARP, pepA	leucyl aminopeptidase	EC:3.4.11.1	1	ko00480,Glutathione metabolism
PROKKA_00241	K01255	CARP, pepA	leucyl aminopeptidase	EC:3.4.11.1	1	ko00480,Glutathione metabolism
PROKKA_00246	K00876	udk, UCK	uridine kinase	EC:2.7.1.48	2	ko00240,Pyrimidine metabolism;ko00983,Drug metabolism - other enzymes
PROKKA_00247	K00876	udk, UCK	uridine kinase	EC:2.7.1.48	2	ko00240,Pyrimidine metabolism;ko00983,Drug metabolism - other enzymes
PROKKA_00248	K01478	E3.5.3.6, arcA	arginine deiminase	EC:3.5.3.6	1	ko00330,Arginine and proline metabolism
PROKKA_00250	K02913	RP-L33, MRPL33, rpmG	large subunit ribosomal protein L33	-	1	ko03010,Ribosome
PROKKA_00273	K01869	LARS, leuS	leucyl-tRNA synthetase	EC:6.1.1.4	1	ko00970,Aminoacyl-tRNA biosynthesis
PROKKA_00274	K01869	LARS, leuS	leucyl-tRNA synthetase	EC:6.1.1.4	1	ko00970,Aminoacyl-tRNA biosynthesis
PROKKA_00275	K01869	LARS, leuS	leucyl-tRNA synthetase	EC:6.1.1.4	1	ko00970,Aminoacyl-tRNA biosynthesis
PROKKA_00276	K01869	LARS, leuS	leucyl-tRNA synthetase	EC:6.1.1.4	1	ko00970,Aminoacyl-tRNA biosynthesis
PROKKA_00299	K09697	natA	sodium transport system ATP-binding protein	-	2	ko02010,ABC transporters;ko02020,Two-component system
PROKKA_00373	K06187	recR	recombination protein RecR	-	1	ko03440,Homologous recombination
PROKKA_00374	K06187	recR	recombination protein RecR	-	1	ko03440,Homologous recombination
PROKKA_00376	K02343	DPO3G, dnaX	DNA polymerase III subunit gamma/tau	EC:2.7.7.7	5	ko00230,Purine metabolism;ko00240,Pyrimidine metabolism;ko03030,DNA replication;ko03430,Mismatch repair;ko03440,Homologous recombination
PROKKA_00377	K02343	DPO3G, dnaX	DNA polymerase III subunit gamma/tau	EC:2.7.7.7	5	ko00230,Purine metabolism;ko00240,Pyrimidine metabolism;ko03030,DNA replication;ko03430,Mismatch repair;ko03440,Homologous recombination
PROKKA_00380	K03551	ruvB	holliday junction DNA helicase RuvB	EC:3.6.4.12	1	ko03440,Homologous recombination
PROKKA_00381	K03550	ruvA	holliday junction DNA helicase RuvA	EC:3.6.4.12	1	ko03440,Homologous recombination
PROKKA_00384	K02434	gatB, PET112	aspartyl-tRNA(Asn)/glutamyl-tRNA(Gln) amidotransferase subunit B [EC:6.3.5.6 6.3.5.7]	-	1	ko00970,Aminoacyl-tRNA biosynthesis
PROKKA_00385	K02434	gatB, PET112	aspartyl-tRNA(Asn)/glutamyl-tRNA(Gln) amidotransferase subunit B [EC:6.3.5.6 6.3.5.7]	-	1	ko00970,Aminoacyl-tRNA biosynthesis
PROKKA_00386	K02433	gatA, QRSL1	aspartyl-tRNA(Asn)/glutamyl-tRNA(Gln) amidotransferase subunit A [EC:6.3.5.6 6.3.5.7]	-	1	ko00970,Aminoacyl-tRNA biosynthesis
PROKKA_00387	K02433	gatA, QRSL1	aspartyl-tRNA(Asn)/glutamyl-tRNA(Gln) amidotransferase subunit A [EC:6.3.5.6 6.3.5.7]	-	1	ko00970,Aminoacyl-tRNA biosynthesis
PROKKA_00391	K03648	UNG, UDG	uracil-DNA glycosylase	EC:3.2.2.27	2	ko03410,Base excision repair;ko05340,Primary immunodeficiency
PROKKA_00396	K02314	dnaB	replicative DNA helicase	EC:3.6.4.12	2	ko03030,DNA replication;ko04112,Cell cycle - Caulobacter
PROKKA_00397	K02939	RP-L9, MRPL9, rplI	large subunit ribosomal protein L9	-	1	ko03010,Ribosome
PROKKA_00398	K02963	RP-S18, MRPS18, rpsR	small subunit ribosomal protein S18	-	1	ko03010,Ribosome
PROKKA_00399	K03111	ssb	single-strand DNA-binding protein	-	3	ko03030,DNA replication;ko03430,Mismatch repair;ko03440,Homologous recombination
PROKKA_00400	K03111	ssb	single-strand DNA-binding protein	-	3	ko03030,DNA replication;ko03430,Mismatch repair;ko03440,Homologous recombination
PROKKA_00401	K02990	RP-S6, MRPS6, rpsF	small subunit ribosomal protein S6	-	1	ko03010,Ribosome
PROKKA_00402	K02990	RP-S6, MRPS6, rpsF	small subunit ribosomal protein S6	-	1	ko03010,Ribosome
PROKKA_00403	K01914	asnA	aspartate--ammonia ligase	EC:6.3.1.1	3	ko01230,Biosynthesis of amino acids;ko00250,Alanine, aspartate and glutamate metabolism;ko00460,Cyanoamino acid metabolism
PROKKA_00404	K01914	asnA	aspartate--ammonia ligase	EC:6.3.1.1	3	ko01230,Biosynthesis of amino acids;ko00250,Alanine, aspartate and glutamate metabolism;ko00460,Cyanoamino acid metabolism
PROKKA_00405	K01914	asnA	aspartate--ammonia ligase	EC:6.3.1.1	3	ko01230,Biosynthesis of amino acids;ko00250,Alanine, aspartate and glutamate metabolism;ko00460,Cyanoamino acid metabolism
PROKKA_00406	K03462	NAMPT	nicotinamide phosphoribosyltransferase	EC:2.4.2.12	1	ko00760,Nicotinate and nicotinamide metabolism
PROKKA_00407	K03462	NAMPT	nicotinamide phosphoribosyltransferase	EC:2.4.2.12	1	ko00760,Nicotinate and nicotinamide metabolism
PROKKA_00408	K03462	NAMPT	nicotinamide phosphoribosyltransferase	EC:2.4.2.12	1	ko00760,Nicotinate and nicotinamide metabolism
PROKKA_00409	K03462	NAMPT	nicotinamide phosphoribosyltransferase	EC:2.4.2.12	1	ko00760,Nicotinate and nicotinamide metabolism
PROKKA_00415	K00625	E2.3.1.8, pta	phosphate acetyltransferase	EC:2.3.1.8	6	ko01200,Carbon metabolism;ko00620,Pyruvate metabolism;ko00640,Propanoate metabolism;ko00720,Carbon fixation pathways in prokaryotes;ko00680,Methane metabolism;ko00430,Taurine and hypotaurine metabolism
PROKKA_00419	K02884	RP-L19, MRPL19, rplS	large subunit ribosomal protein L19	-	1	ko03010,Ribosome
PROKKA_00421	K02959	RP-S16, MRPS16, rpsP	small subunit ribosomal protein S16	-	1	ko03010,Ribosome
PROKKA_00422	K02879	RP-L17, MRPL17, rplQ	large subunit ribosomal protein L17	-	1	ko03010,Ribosome
PROKKA_00423	K03040	rpoA	DNA-directed RNA polymerase subunit alpha	EC:2.7.7.6	3	ko00230,Purine metabolism;ko00240,Pyrimidine metabolism;ko03020,RNA polymerase
PROKKA_00424	K03040	rpoA	DNA-directed RNA polymerase subunit alpha	EC:2.7.7.6	3	ko00230,Purine metabolism;ko00240,Pyrimidine metabolism;ko03020,RNA polymerase
PROKKA_00425	K02948	RP-S11, MRPS11, rpsK	small subunit ribosomal protein S11	-	1	ko03010,Ribosome
PROKKA_00426	K02948	RP-S11, MRPS11, rpsK	small subunit ribosomal protein S11	-	1	ko03010,Ribosome
PROKKA_00427	K02952	RP-S13, rpsM	small subunit ribosomal protein S13	-	1	ko03010,Ribosome
PROKKA_00436	K01783	rpe, RPE	ribulose-phosphate 3-epimerase	EC:5.1.3.1	5	ko01200,Carbon metabolism;ko01230,Biosynthesis of amino acids;ko00030,Pentose phosphate pathway;ko00040,Pentose and glucuronate interconversions;ko00710,Carbon fixation in photosynthetic organisms
PROKKA_00437	K01810	GPI, pgi	glucose-6-phosphate isomerase	EC:5.3.1.9	5	ko01200,Carbon metabolism;ko00010,Glycolysis / Gluconeogenesis;ko00030,Pentose phosphate pathway;ko00500,Starch and sucrose metabolism;ko00520,Amino sugar and nucleotide sugar metabolism
PROKKA_00438	K01810	GPI, pgi	glucose-6-phosphate isomerase	EC:5.3.1.9	5	ko01200,Carbon metabolism;ko00010,Glycolysis / Gluconeogenesis;ko00030,Pentose phosphate pathway;ko00500,Starch and sucrose metabolism;ko00520,Amino sugar and nucleotide sugar metabolism
PROKKA_00441	K11959	urtA	urea transport system substrate-binding protein	-	1	ko02010,ABC transporters
PROKKA_00444	K00942	E2.7.4.8, gmk	guanylate kinase	EC:2.7.4.8	1	ko00230,Purine metabolism
PROKKA_00458	K03073	secE	preprotein translocase subunit SecE	-	2	ko03060,Protein export;ko03070,Bacterial secretion system
PROKKA_00471	K02111	ATPF1A, atpA	F-type H+-transporting ATPase subunit alpha	EC:3.6.3.14	2	ko00190,Oxidative phosphorylation;ko00195,Photosynthesis
PROKKA_00472	K02111	ATPF1A, atpA	F-type H+-transporting ATPase subunit alpha	EC:3.6.3.14	2	ko00190,Oxidative phosphorylation;ko00195,Photosynthesis
PROKKA_00473	K02112	ATPF1B, atpD	F-type H+-transporting ATPase subunit beta	EC:3.6.3.14	2	ko00190,Oxidative phosphorylation;ko00195,Photosynthesis
PROKKA_00484	K03048	rpoE	DNA-directed RNA polymerase subunit delta	-	3	ko00230,Purine metabolism;ko00240,Pyrimidine metabolism;ko03020,RNA polymerase
PROKKA_00485	K01624	FBA, fbaA	fructose-bisphosphate aldolase, class II	EC:4.1.2.13	7	ko01200,Carbon metabolism;ko01230,Biosynthesis of amino acids;ko00010,Glycolysis / Gluconeogenesis;ko00030,Pentose phosphate pathway;ko00051,Fructose and mannose metabolism;ko00710,Carbon fixation in photosynthetic organisms;ko00680,Methane metabolism
PROKKA_00486	K01624	FBA, fbaA	fructose-bisphosphate aldolase, class II	EC:4.1.2.13	7	ko01200,Carbon metabolism;ko01230,Biosynthesis of amino acids;ko00010,Glycolysis / Gluconeogenesis;ko00030,Pentose phosphate pathway;ko00051,Fructose and mannose metabolism;ko00710,Carbon fixation in photosynthetic organisms;ko00680,Methane metabolism
PROKKA_00487	K01624	FBA, fbaA	fructose-bisphosphate aldolase, class II	EC:4.1.2.13	7	ko01200,Carbon metabolism;ko01230,Biosynthesis of amino acids;ko00010,Glycolysis / Gluconeogenesis;ko00030,Pentose phosphate pathway;ko00051,Fructose and mannose metabolism;ko00710,Carbon fixation in photosynthetic organisms;ko00680,Methane metabolism
PROKKA_00489	K00857	tdk, TK	thymidine kinase	EC:2.7.1.21	2	ko00240,Pyrimidine metabolism;ko00983,Drug metabolism - other enzymes
PROKKA_00490	K02867	RP-L11, MRPL11, rplK	large subunit ribosomal protein L11	-	1	ko03010,Ribosome
PROKKA_00491	K02863	RP-L1, MRPL1, rplA	large subunit ribosomal protein L1	-	1	ko03010,Ribosome
PROKKA_00492	K02863	RP-L1, MRPL1, rplA	large subunit ribosomal protein L1	-	1	ko03010,Ribosome
PROKKA_00495	K02768	PTS-Fru-EIIA, fruB	PTS system, fructose-specific IIA component	EC:2.7.1.69	2	ko00051,Fructose and mannose metabolism;ko02060,Phosphotransferase system (PTS)
PROKKA_00496	K02768	PTS-Fru-EIIA, fruB	PTS system, fructose-specific IIA component	EC:2.7.1.69	2	ko00051,Fructose and mannose metabolism;ko02060,Phosphotransferase system (PTS)
PROKKA_00498	K01809	E5.3.1.8, manA	mannose-6-phosphate isomerase	EC:5.3.1.8	2	ko00051,Fructose and mannose metabolism;ko00520,Amino sugar and nucleotide sugar metabolism
PROKKA_00517	K01883	CARS, cysS	cysteinyl-tRNA synthetase	EC:6.1.1.16	1	ko00970,Aminoacyl-tRNA biosynthesis
PROKKA_00518	K01883	CARS, cysS	cysteinyl-tRNA synthetase	EC:6.1.1.16	1	ko00970,Aminoacyl-tRNA biosynthesis
PROKKA_00563	K00128	E1.2.1.3	aldehyde dehydrogenase (NAD+)	EC:1.2.1.3	15	ko00010,Glycolysis / Gluconeogenesis;ko00040,Pentose and glucuronate interconversions;ko00053,Ascorbate and aldarate metabolism;ko00620,Pyruvate metabolism;ko00640,Propanoate metabolism;ko00071,Fatty acid degradation;ko00561,Glycerolipid metabolism;ko00280,Valine, leucine and isoleucine degradation;ko00310,Lysine degradation;ko00330,Arginine and proline metabolism;ko00340,Histidine metabolism;ko0…
PROKKA_00564	K00128	E1.2.1.3	aldehyde dehydrogenase (NAD+)	EC:1.2.1.3	15	ko00010,Glycolysis / Gluconeogenesis;ko00040,Pentose and glucuronate interconversions;ko00053,Ascorbate and aldarate metabolism;ko00620,Pyruvate metabolism;ko00640,Propanoate metabolism;ko00071,Fatty acid degradation;ko00561,Glycerolipid metabolism;ko00280,Valine, leucine and isoleucine degradation;ko00310,Lysine degradation;ko00330,Arginine and proline metabolism;ko00340,Histidine metabolism;ko0…
PROKKA_00570	K02112	ATPF1B, atpD	F-type H+-transporting ATPase subunit beta	EC:3.6.3.14	2	ko00190,Oxidative phosphorylation;ko00195,Photosynthesis
PROKKA_00581	K01972	E6.5.1.2, ligA, ligB	DNA ligase (NAD+)	EC:6.5.1.2	4	ko03030,DNA replication;ko03410,Base excision repair;ko03420,Nucleotide excision repair;ko03430,Mismatch repair
PROKKA_00582	K01972	E6.5.1.2, ligA, ligB	DNA ligase (NAD+)	EC:6.5.1.2	4	ko03030,DNA replication;ko03410,Base excision repair;ko03420,Nucleotide excision repair;ko03430,Mismatch repair
PROKKA_00583	K01972	E6.5.1.2, ligA, ligB	DNA ligase (NAD+)	EC:6.5.1.2	4	ko03030,DNA replication;ko03410,Base excision repair;ko03420,Nucleotide excision repair;ko03430,Mismatch repair
PROKKA_00606	K02112	ATPF1B, atpD	F-type H+-transporting ATPase subunit beta	EC:3.6.3.14	2	ko00190,Oxidative phosphorylation;ko00195,Photosynthesis
PROKKA_00607	K02112	ATPF1B, atpD	F-type H+-transporting ATPase subunit beta	EC:3.6.3.14	2	ko00190,Oxidative phosphorylation;ko00195,Photosynthesis
PROKKA_00621	K00128	E1.2.1.3	aldehyde dehydrogenase (NAD+)	EC:1.2.1.3	15	ko00010,Glycolysis / Gluconeogenesis;ko00040,Pentose and glucuronate interconversions;ko00053,Ascorbate and aldarate metabolism;ko00620,Pyruvate metabolism;ko00640,Propanoate metabolism;ko00071,Fatty acid degradation;ko00561,Glycerolipid metabolism;ko00280,Valine, leucine and isoleucine degradation;ko00310,Lysine degradation;ko00330,Arginine and proline metabolism;ko00340,Histidine metabolism;ko0…
PROKKA_00622	K00128	E1.2.1.3	aldehyde dehydrogenase (NAD+)	EC:1.2.1.3	15	ko00010,Glycolysis / Gluconeogenesis;ko00040,Pentose and glucuronate interconversions;ko00053,Ascorbate and aldarate metabolism;ko00620,Pyruvate metabolism;ko00640,Propanoate metabolism;ko00071,Fatty acid degradation;ko00561,Glycerolipid metabolism;ko00280,Valine, leucine and isoleucine degradation;ko00310,Lysine degradation;ko00330,Arginine and proline metabolism;ko00340,Histidine metabolism;ko0…
PROKKA_00625	K01885	EARS, gltX	glutamyl-tRNA synthetase	EC:6.1.1.17	2	ko00860,Porphyrin and chlorophyll metabolism;ko00970,Aminoacyl-tRNA biosynthesis
PROKKA_00627	K01885	EARS, gltX	glutamyl-tRNA synthetase	EC:6.1.1.17	2	ko00860,Porphyrin and chlorophyll metabolism;ko00970,Aminoacyl-tRNA biosynthesis
PROKKA_00628	K01885	EARS, gltX	glutamyl-tRNA synthetase	EC:6.1.1.17	2	ko00860,Porphyrin and chlorophyll metabolism;ko00970,Aminoacyl-tRNA biosynthesis
PROKKA_00629	K01491	folD	methylenetetrahydrofolate dehydrogenase (NADP+) / methenyltetrahydrofolate cyclohydrolase [EC:1.5.1.5 3.5.4.9]	-	3	ko01200,Carbon metabolism;ko00720,Carbon fixation pathways in prokaryotes;ko00670,One carbon pool by folate
PROKKA_00640	K02341	DPO3D2, holB	DNA polymerase III subunit delta'	EC:2.7.7.7	5	ko00230,Purine metabolism;ko00240,Pyrimidine metabolism;ko03030,DNA replication;ko03430,Mismatch repair;ko03440,Homologous recombination
PROKKA_00641	K00943	E2.7.4.9, tmk	dTMP kinase	EC:2.7.4.9	1	ko00240,Pyrimidine metabolism
PROKKA_00642	K01875	SARS, serS	seryl-tRNA synthetase	EC:6.1.1.11	1	ko00970,Aminoacyl-tRNA biosynthesis
PROKKA_00651	K02338	DPO3B, dnaN	DNA polymerase III subunit beta	EC:2.7.7.7	5	ko00230,Purine metabolism;ko00240,Pyrimidine metabolism;ko03030,DNA replication;ko03430,Mismatch repair;ko03440,Homologous recombination
PROKKA_00652	K02338	DPO3B, dnaN	DNA polymerase III subunit beta	EC:2.7.7.7	5	ko00230,Purine metabolism;ko00240,Pyrimidine metabolism;ko03030,DNA replication;ko03430,Mismatch repair;ko03440,Homologous recombination
PROKKA_00685	K03763	DPO3A2, polC	DNA polymerase III subunit alpha, Gram-positive type	EC:2.7.7.7	5	ko00230,Purine metabolism;ko00240,Pyrimidine metabolism;ko03030,DNA replication;ko03430,Mismatch repair;ko03440,Homologous recombination
PROKKA_00686	K03763	DPO3A2, polC	DNA polymerase III subunit alpha, Gram-positive type	EC:2.7.7.7	5	ko00230,Purine metabolism;ko00240,Pyrimidine metabolism;ko03030,DNA replication;ko03430,Mismatch repair;ko03440,Homologous recombination
PROKKA_00688	K03763	DPO3A2, polC	DNA polymerase III subunit alpha, Gram-positive type	EC:2.7.7.7	5	ko00230,Purine metabolism;ko00240,Pyrimidine metabolism;ko03030,DNA replication;ko03430,Mismatch repair;ko03440,Homologous recombination
PROKKA_00689	K03763	DPO3A2, polC	DNA polymerase III subunit alpha, Gram-positive type	EC:2.7.7.7	5	ko00230,Purine metabolism;ko00240,Pyrimidine metabolism;ko03030,DNA replication;ko03430,Mismatch repair;ko03440,Homologous recombination
PROKKA_00690	K03763	DPO3A2, polC	DNA polymerase III subunit alpha, Gram-positive type	EC:2.7.7.7	5	ko00230,Purine metabolism;ko00240,Pyrimidine metabolism;ko03030,DNA replication;ko03430,Mismatch repair;ko03440,Homologous recombination
PROKKA_00691	K03763	DPO3A2, polC	DNA polymerase III subunit alpha, Gram-positive type	EC:2.7.7.7	5	ko00230,Purine metabolism;ko00240,Pyrimidine metabolism;ko03030,DNA replication;ko03430,Mismatch repair;ko03440,Homologous recombination
PROKKA_00692	K03763	DPO3A2, polC	DNA polymerase III subunit alpha, Gram-positive type	EC:2.7.7.7	5	ko00230,Purine metabolism;ko00240,Pyrimidine metabolism;ko03030,DNA replication;ko03430,Mismatch repair;ko03440,Homologous recombination
PROKKA_00696	K00099	dxr	1-deoxy-D-xylulose-5-phosphate reductoisomerase	EC:1.1.1.267	1	ko00900,Terpenoid backbone biosynthesis
PROKKA_00697	K00981	E2.7.7.41, CDS1, CDS2, cdsA	phosphatidate cytidylyltransferase	EC:2.7.7.41	2	ko00564,Glycerophospholipid metabolism;ko04070,Phosphatidylinositol signaling system
PROKKA_00698	K00981	E2.7.7.41, CDS1, CDS2, cdsA	phosphatidate cytidylyltransferase	EC:2.7.7.41	2	ko00564,Glycerophospholipid metabolism;ko04070,Phosphatidylinositol signaling system
PROKKA_00700	K09903	pyrH	uridylate kinase	EC:2.7.4.22	1	ko00240,Pyrimidine metabolism
PROKKA_00703	K03701	uvrA	excinuclease ABC subunit A	-	1	ko03420,Nucleotide excision repair
PROKKA_00704	K03701	uvrA	excinuclease ABC subunit A	-	1	ko03420,Nucleotide excision repair
PROKKA_00705	K03701	uvrA	excinuclease ABC subunit A	-	1	ko03420,Nucleotide excision repair
PROKKA_00714	K12574	rnj	ribonuclease J	EC:3.1.-.-	1	ko03018,RNA degradation
PROKKA_00715	K02956	RP-S15, MRPS15, rpsO	small subunit ribosomal protein S15	-	1	ko03010,Ribosome
PROKKA_00717	K08483	PTS-EI.PTSI, ptsI	phosphotransferase system, enzyme I, PtsI	EC:2.7.3.9	1	ko02060,Phosphotransferase system (PTS)
PROKKA_00718	K08483	PTS-EI.PTSI, ptsI	phosphotransferase system, enzyme I, PtsI	EC:2.7.3.9	1	ko02060,Phosphotransferase system (PTS)
PROKKA_00719	K08483	PTS-EI.PTSI, ptsI	phosphotransferase system, enzyme I, PtsI	EC:2.7.3.9	1	ko02060,Phosphotransferase system (PTS)
PROKKA_00727	K04567	KARS, lysS	lysyl-tRNA synthetase, class II	EC:6.1.1.6	1	ko00970,Aminoacyl-tRNA biosynthesis
PROKKA_00734	K00016	LDH, ldh	L-lactate dehydrogenase	EC:1.1.1.27	4	ko00010,Glycolysis / Gluconeogenesis;ko00620,Pyruvate metabolism;ko00640,Propanoate metabolism;ko00270,Cysteine and methionine metabolism
PROKKA_00735	K00016	LDH, ldh	L-lactate dehydrogenase	EC:1.1.1.27	4	ko00010,Glycolysis / Gluconeogenesis;ko00620,Pyruvate metabolism;ko00640,Propanoate metabolism;ko00270,Cysteine and methionine metabolism
PROKKA_00738	K00939	E2.7.4.3, adk	adenylate kinase	EC:2.7.4.3	1	ko00230,Purine metabolism
PROKKA_00739	K00939	E2.7.4.3, adk	adenylate kinase	EC:2.7.4.3	1	ko00230,Purine metabolism
PROKKA_00740	K03076	secY	preprotein translocase subunit SecY	-	2	ko03060,Protein export;ko03070,Bacterial secretion system
PROKKA_00741	K03076	secY	preprotein translocase subunit SecY	-	2	ko03060,Protein export;ko03070,Bacterial secretion system
PROKKA_00742	K02876	RP-L15, MRPL15, rplO	large subunit ribosomal protein L15	-	1	ko03010,Ribosome
PROKKA_00743	K02988	RP-S5, MRPS5, rpsE	small subunit ribosomal protein S5	-	1	ko03010,Ribosome
PROKKA_00744	K02881	RP-L18, MRPL18, rplR	large subunit ribosomal protein L18	-	1	ko03010,Ribosome
PROKKA_00745	K02881	RP-L18, MRPL18, rplR	large subunit ribosomal protein L18	-	1	ko03010,Ribosome
PROKKA_00746	K02933	RP-L6, MRPL6, rplF	large subunit ribosomal protein L6	-	1	ko03010,Ribosome
PROKKA_00747	K02933	RP-L6, MRPL6, rplF	large subunit ribosomal protein L6	-	1	ko03010,Ribosome
PROKKA_00748	K02994	RP-S8, rpsH	small subunit ribosomal protein S8	-	1	ko03010,Ribosome
PROKKA_00749	K02954	RP-S14, MRPS14, rpsN	small subunit ribosomal protein S14	-	1	ko03010,Ribosome
PROKKA_00750	K02931	RP-L5, MRPL5, rplE	large subunit ribosomal protein L5	-	1	ko03010,Ribosome
PROKKA_00751	K02931	RP-L5, MRPL5, rplE	large subunit ribosomal protein L5	-	1	ko03010,Ribosome
PROKKA_00752	K02895	RP-L24, MRPL24, rplX	large subunit ribosomal protein L24	-	1	ko03010,Ribosome
PROKKA_00753	K02874	RP-L14, MRPL14, rplN	large subunit ribosomal protein L14	-	1	ko03010,Ribosome
PROKKA_00754	K02961	RP-S17, MRPS17, rpsQ	small subunit ribosomal protein S17	-	1	ko03010,Ribosome
PROKKA_00755	K02904	RP-L29, rpmC	large subunit ribosomal protein L29	-	1	ko03010,Ribosome
PROKKA_00757	K02878	RP-L16, MRPL16, rplP	large subunit ribosomal protein L16	-	1	ko03010,Ribosome
PROKKA_00758	K02982	RP-S3, rpsC	small subunit ribosomal protein S3	-	1	ko03010,Ribosome
PROKKA_00759	K02890	RP-L22, MRPL22, rplV	large subunit ribosomal protein L22	-	1	ko03010,Ribosome
PROKKA_00760	K02965	RP-S19, rpsS	small subunit ribosomal protein S19	-	1	ko03010,Ribosome
PROKKA_00761	K02886	RP-L2, MRPL2, rplB	large subunit ribosomal protein L2	-	1	ko03010,Ribosome
PROKKA_00762	K02892	RP-L23, MRPL23, rplW	large subunit ribosomal protein L23	-	1	ko03010,Ribosome
PROKKA_00763	K02926	RP-L4, MRPL4, rplD	large subunit ribosomal protein L4	-	1	ko03010,Ribosome
PROKKA_00764	K02906	RP-L3, MRPL3, rplC	large subunit ribosomal protein L3	-	1	ko03010,Ribosome
PROKKA_00765	K02906	RP-L3, MRPL3, rplC	large subunit ribosomal protein L3	-	1	ko03010,Ribosome
PROKKA_00766	K02946	RP-S10, MRPS10, rpsJ	small subunit ribosomal protein S10	-	1	ko03010,Ribosome
PROKKA_00771	K01493	comEB	dCMP deaminase	EC:3.5.4.12	1	ko00240,Pyrimidine metabolism
PROKKA_00772	K01493	comEB	dCMP deaminase	EC:3.5.4.12	1	ko00240,Pyrimidine metabolism
PROKKA_00773	K01493	comEB	dCMP deaminase	EC:3.5.4.12	1	ko00240,Pyrimidine metabolism
PROKKA_00774	K00560	thyA, TYMS	thymidylate synthase	EC:2.1.1.45	2	ko00240,Pyrimidine metabolism;ko00670,One carbon pool by folate
PROKKA_00775	K00560	thyA, TYMS	thymidylate synthase	EC:2.1.1.45	2	ko00240,Pyrimidine metabolism;ko00670,One carbon pool by folate
PROKKA_00776	K00526	E1.17.4.1B, nrdB, nrdF	ribonucleoside-diphosphate reductase beta chain	EC:1.17.4.1	2	ko00230,Purine metabolism;ko00240,Pyrimidine metabolism
PROKKA_00777	K00526	E1.17.4.1B, nrdB, nrdF	ribonucleoside-diphosphate reductase beta chain	EC:1.17.4.1	2	ko00230,Purine metabolism;ko00240,Pyrimidine metabolism
PROKKA_00778	K00526	E1.17.4.1B, nrdB, nrdF	ribonucleoside-diphosphate reductase beta chain	EC:1.17.4.1	2	ko00230,Purine metabolism;ko00240,Pyrimidine metabolism
PROKKA_00780	K00525	E1.17.4.1A, nrdA, nrdE	ribonucleoside-diphosphate reductase alpha chain	EC:1.17.4.1	2	ko00230,Purine metabolism;ko00240,Pyrimidine metabolism
PROKKA_00781	K00525	E1.17.4.1A, nrdA, nrdE	ribonucleoside-diphosphate reductase alpha chain	EC:1.17.4.1	2	ko00230,Purine metabolism;ko00240,Pyrimidine metabolism
PROKKA_00784	K02036	pstB	phosphate transport system ATP-binding protein	EC:3.6.3.27	1	ko02010,ABC transporters
PROKKA_00785	K02036	pstB	phosphate transport system ATP-binding protein	EC:3.6.3.27	1	ko02010,ABC transporters
PROKKA_00786	K02037	pstC	phosphate transport system permease protein	-	1	ko02010,ABC transporters
PROKKA_00787	K02037	pstC	phosphate transport system permease protein	-	1	ko02010,ABC transporters
PROKKA_00788	K02037	pstC	phosphate transport system permease protein	-	1	ko02010,ABC transporters
PROKKA_00789	K02040	pstS	phosphate transport system substrate-binding protein	-	3	ko02010,ABC transporters;ko02020,Two-component system;ko05152,Tuberculosis
PROKKA_00790	K02040	pstS	phosphate transport system substrate-binding protein	-	3	ko02010,ABC transporters;ko02020,Two-component system;ko05152,Tuberculosis
PROKKA_00791	K03702	uvrB	excinuclease ABC subunit B	-	1	ko03420,Nucleotide excision repair
PROKKA_00792	K03702	uvrB	excinuclease ABC subunit B	-	1	ko03420,Nucleotide excision repair
PROKKA_00803	K10112	msmX, msmK, malK, sugC, ggtA, msiK	multiple sugar transport system ATP-binding protein	-	1	ko02010,ABC transporters
PROKKA_00804	K10112	msmX, msmK, malK, sugC, ggtA, msiK	multiple sugar transport system ATP-binding protein	-	1	ko02010,ABC transporters
PROKKA_00812	K03070	secA	preprotein translocase subunit SecA	-	2	ko03060,Protein export;ko03070,Bacterial secretion system
PROKKA_00813	K03070	secA	preprotein translocase subunit SecA	-	2	ko03060,Protein export;ko03070,Bacterial secretion system
PROKKA_00814	K00615	E2.2.1.1, tktA, tktB	transketolase	EC:2.2.1.1	5	ko01200,Carbon metabolism;ko01230,Biosynthesis of amino acids;ko00030,Pentose phosphate pathway;ko00710,Carbon fixation in photosynthetic organisms;ko01051,Biosynthesis of ansamycins
PROKKA_00815	K00615	E2.2.1.1, tktA, tktB	transketolase	EC:2.2.1.1	5	ko01200,Carbon metabolism;ko01230,Biosynthesis of amino acids;ko00030,Pentose phosphate pathway;ko00710,Carbon fixation in photosynthetic organisms;ko01051,Biosynthesis of ansamycins
PROKKA_00818	K05879	dhaL	dihydroxyacetone kinase, C-terminal domain	EC:2.7.1.-	1	ko00561,Glycerolipid metabolism
PROKKA_00819	K13527	mpa	proteasome-associated ATPase	-	1	ko03050,Proteasome
PROKKA_00820	K00760	hprT, hpt, HPRT1	hypoxanthine phosphoribosyltransferase	EC:2.4.2.8	2	ko00230,Purine metabolism;ko00983,Drug metabolism - other enzymes
PROKKA_00821	K01770	ispF	2-C-methyl-D-erythritol 2,4-cyclodiphosphate synthase	EC:4.6.1.12	1	ko00900,Terpenoid backbone biosynthesis
PROKKA_00824	K11631	bceA	bacitracin transport system ATP-binding protein	-	3	ko02010,ABC transporters;ko02020,Two-component system;ko05150,Staphylococcus aureus infection
PROKKA_00831	K12574	rnj	ribonuclease J	EC:3.1.-.-	1	ko03018,RNA degradation
PROKKA_00832	K01951	guaA, GMPS	GMP synthase (glutamine-hydrolysing)	EC:6.3.5.2	2	ko00230,Purine metabolism;ko00983,Drug metabolism - other enzymes
PROKKA_00833	K01951	guaA, GMPS	GMP synthase (glutamine-hydrolysing)	EC:6.3.5.2	2	ko00230,Purine metabolism;ko00983,Drug metabolism - other enzymes
PROKKA_00838	K00111	glpA, glpD	glycerol-3-phosphate dehydrogenase	EC:1.1.5.3	1	ko00564,Glycerophospholipid metabolism
PROKKA_00839	K00111	glpA, glpD	glycerol-3-phosphate dehydrogenase	EC:1.1.5.3	1	ko00564,Glycerophospholipid metabolism
PROKKA_00840	K00864	glpK, GK	glycerol kinase	EC:2.7.1.30	3	ko00561,Glycerolipid metabolism;ko03320,PPAR signaling pathway;ko04626,Plant-pathogen interaction
PROKKA_00842	K00864	glpK, GK	glycerol kinase	EC:2.7.1.30	3	ko00561,Glycerolipid metabolism;ko03320,PPAR signaling pathway;ko04626,Plant-pathogen interaction
PROKKA_00849	K01887	RARS, argS	arginyl-tRNA synthetase	EC:6.1.1.19	1	ko00970,Aminoacyl-tRNA biosynthesis
PROKKA_00850	K01887	RARS, argS	arginyl-tRNA synthetase	EC:6.1.1.19	1	ko00970,Aminoacyl-tRNA biosynthesis
PROKKA_00851	K01887	RARS, argS	arginyl-tRNA synthetase	EC:6.1.1.19	1	ko00970,Aminoacyl-tRNA biosynthesis
PROKKA_00852	K01887	RARS, argS	arginyl-tRNA synthetase	EC:6.1.1.19	1	ko00970,Aminoacyl-tRNA biosynthesis
PROKKA_00853	K00919	ispE	4-diphosphocytidyl-2-C-methyl-D-erythritol kinase	EC:2.7.1.148	1	ko00900,Terpenoid backbone biosynthesis
PROKKA_00854	K00919	ispE	4-diphosphocytidyl-2-C-methyl-D-erythritol kinase	EC:2.7.1.148	1	ko00900,Terpenoid backbone biosynthesis
PROKKA_00857	K03217	yidC, spoIIIJ, OXA1	YidC/Oxa1 family membrane protein insertase	-	2	ko03060,Protein export;ko03070,Bacterial secretion system
PROKKA_00858	K03217	yidC, spoIIIJ, OXA1	YidC/Oxa1 family membrane protein insertase	-	2	ko03060,Protein export;ko03070,Bacterial secretion system
PROKKA_00860	K02914	RP-L34, MRPL34, rpmH	large subunit ribosomal protein L34	-	1	ko03010,Ribosome
PROKKA_00867	K02313	dnaA	chromosomal replication initiator protein	-	2	ko02020,Two-component system;ko04112,Cell cycle - Caulobacter
PROKKA_00868	K02313	dnaA	chromosomal replication initiator protein	-	2	ko02020,Two-component system;ko04112,Cell cycle - Caulobacter
PROKKA_00897	K00384	E1.8.1.9, trxB	thioredoxin reductase (NADPH)	EC:1.8.1.9	2	ko00240,Pyrimidine metabolism;ko00450,Selenocompound metabolism
PROKKA_00898	K01478	E3.5.3.6, arcA	arginine deiminase	EC:3.5.3.6	1	ko00330,Arginine and proline metabolism
PROKKA_00899	K01478	E3.5.3.6, arcA	arginine deiminase	EC:3.5.3.6	1	ko00330,Arginine and proline metabolism
PROKKA_00900	K01478	E3.5.3.6, arcA	arginine deiminase	EC:3.5.3.6	1	ko00330,Arginine and proline metabolism
PROKKA_00918	K01870	IARS, ileS	isoleucyl-tRNA synthetase	EC:6.1.1.5	1	ko00970,Aminoacyl-tRNA biosynthesis
PROKKA_00919	K01870	IARS, ileS	isoleucyl-tRNA synthetase	EC:6.1.1.5	1	ko00970,Aminoacyl-tRNA biosynthesis
PROKKA_00920	K01870	IARS, ileS	isoleucyl-tRNA synthetase	EC:6.1.1.5	1	ko00970,Aminoacyl-tRNA biosynthesis
PROKKA_00921	K01870	IARS, ileS	isoleucyl-tRNA synthetase	EC:6.1.1.5	1	ko00970,Aminoacyl-tRNA biosynthesis
PROKKA_00930	K02970	RP-S21, MRPS21, rpsU	small subunit ribosomal protein S21	-	1	ko03010,Ribosome
PROKKA_00936	K00927	PGK, pgk	phosphoglycerate kinase	EC:2.7.2.3	4	ko01200,Carbon metabolism;ko01230,Biosynthesis of amino acids;ko00010,Glycolysis / Gluconeogenesis;ko00710,Carbon fixation in photosynthetic organisms
PROKKA_00937	K00927	PGK, pgk	phosphoglycerate kinase	EC:2.7.2.3	4	ko01200,Carbon metabolism;ko01230,Biosynthesis of amino acids;ko00010,Glycolysis / Gluconeogenesis;ko00710,Carbon fixation in photosynthetic organisms
PROKKA_00938	K00927	PGK, pgk	phosphoglycerate kinase	EC:2.7.2.3	4	ko01200,Carbon metabolism;ko01230,Biosynthesis of amino acids;ko00010,Glycolysis / Gluconeogenesis;ko00710,Carbon fixation in photosynthetic organisms
PROKKA_00939	K00134	GAPDH, gapA	glyceraldehyde 3-phosphate dehydrogenase	EC:1.2.1.12	6	ko01200,Carbon metabolism;ko01230,Biosynthesis of amino acids;ko00010,Glycolysis / Gluconeogenesis;ko00710,Carbon fixation in photosynthetic organisms;ko04066,HIF-1 signaling pathway;ko05010,Alzheimer's disease
PROKKA_00940	K00134	GAPDH, gapA	glyceraldehyde 3-phosphate dehydrogenase	EC:1.2.1.12	6	ko01200,Carbon metabolism;ko01230,Biosynthesis of amino acids;ko00010,Glycolysis / Gluconeogenesis;ko00710,Carbon fixation in photosynthetic organisms;ko04066,HIF-1 signaling pathway;ko05010,Alzheimer's disease
PROKKA_00949	K02114	ATPF1E, atpC	F-type H+-transporting ATPase subunit epsilon	-	2	ko00190,Oxidative phosphorylation;ko00195,Photosynthesis
PROKKA_00950	K02112	ATPF1B, atpD	F-type H+-transporting ATPase subunit beta	EC:3.6.3.14	2	ko00190,Oxidative phosphorylation;ko00195,Photosynthesis
PROKKA_00951	K02115	ATPF1G, atpG	F-type H+-transporting ATPase subunit gamma	-	2	ko00190,Oxidative phosphorylation;ko00195,Photosynthesis
PROKKA_00952	K02115	ATPF1G, atpG	F-type H+-transporting ATPase subunit gamma	-	2	ko00190,Oxidative phosphorylation;ko00195,Photosynthesis
PROKKA_00953	K02111	ATPF1A, atpA	F-type H+-transporting ATPase subunit alpha	EC:3.6.3.14	2	ko00190,Oxidative phosphorylation;ko00195,Photosynthesis
PROKKA_00954	K02111	ATPF1A, atpA	F-type H+-transporting ATPase subunit alpha	EC:3.6.3.14	2	ko00190,Oxidative phosphorylation;ko00195,Photosynthesis
PROKKA_00955	K02111	ATPF1A, atpA	F-type H+-transporting ATPase subunit alpha	EC:3.6.3.14	2	ko00190,Oxidative phosphorylation;ko00195,Photosynthesis
PROKKA_00956	K02113	ATPF1D, atpH	F-type H+-transporting ATPase subunit delta	-	2	ko00190,Oxidative phosphorylation;ko00195,Photosynthesis
PROKKA_00957	K02109	ATPF0B, atpF	F-type H+-transporting ATPase subunit b	-	2	ko00190,Oxidative phosphorylation;ko00195,Photosynthesis
PROKKA_00959	K02110	ATPF0C, atpE	F-type H+-transporting ATPase subunit c	-	2	ko00190,Oxidative phosphorylation;ko00195,Photosynthesis
PROKKA_00960	K02108	ATPF0A, atpB	F-type H+-transporting ATPase subunit a	-	2	ko00190,Oxidative phosphorylation;ko00195,Photosynthesis
PROKKA_00961	K02108	ATPF0A, atpB	F-type H+-transporting ATPase subunit a	-	2	ko00190,Oxidative phosphorylation;ko00195,Photosynthesis
PROKKA_00964	K00761	upp, UPRT	uracil phosphoribosyltransferase	EC:2.4.2.9	1	ko00240,Pyrimidine metabolism
PROKKA_00965	K03526	E1.17.7.1, gcpE, ispG	(E)-4-hydroxy-3-methylbut-2-enyl-diphosphate synthase	EC:1.17.7.1	1	ko00900,Terpenoid backbone biosynthesis
PROKKA_00966	K02996	RP-S9, MRPS9, rpsI	small subunit ribosomal protein S9	-	1	ko03010,Ribosome
PROKKA_00967	K02871	RP-L13, MRPL13, rplM	large subunit ribosomal protein L13	-	1	ko03010,Ribosome
PROKKA_00980	K00600	glyA, SHMT	glycine hydroxymethyltransferase	EC:2.1.2.1	7	ko01200,Carbon metabolism;ko01230,Biosynthesis of amino acids;ko00630,Glyoxylate and dicarboxylate metabolism;ko00680,Methane metabolism;ko00260,Glycine, serine and threonine metabolism;ko00460,Cyanoamino acid metabolism;ko00670,One carbon pool by folate
PROKKA_00981	K01866	YARS, tyrS	tyrosyl-tRNA synthetase	EC:6.1.1.1	1	ko00970,Aminoacyl-tRNA biosynthesis
PROKKA_00982	K01866	YARS, tyrS	tyrosyl-tRNA synthetase	EC:6.1.1.1	1	ko00970,Aminoacyl-tRNA biosynthesis
PROKKA_00983	K03106	SRP54, ffh	signal recognition particle subunit SRP54	-	2	ko03060,Protein export;ko03070,Bacterial secretion system
PROKKA_00984	K03106	SRP54, ffh	signal recognition particle subunit SRP54	-	2	ko03060,Protein export;ko03070,Bacterial secretion system
PROKKA_00986	K11051	ABC-2.CYL.P, cylB	multidrug/hemolysin transport system permease protein	-	1	ko02010,ABC transporters
PROKKA_00987	K11050	ABC-2.CYL.A, cylA	multidrug/hemolysin transport system ATP-binding protein	-	1	ko02010,ABC transporters
PROKKA_00988	K11050	ABC-2.CYL.A, cylA	multidrug/hemolysin transport system ATP-binding protein	-	1	ko02010,ABC transporters
PROKKA_00989	K11050	ABC-2.CYL.A, cylA	multidrug/hemolysin transport system ATP-binding protein	-	1	ko02010,ABC transporters
PROKKA_00992	K00057	gpsA	glycerol-3-phosphate dehydrogenase (NAD(P)+)	EC:1.1.1.94	1	ko00564,Glycerophospholipid metabolism
PROKKA_00993	K00057	gpsA	glycerol-3-phosphate dehydrogenase (NAD(P)+)	EC:1.1.1.94	1	ko00564,Glycerophospholipid metabolism
PROKKA_00999	K11717	sufS	cysteine desulfurase / selenocysteine lyase [EC:2.8.1.7 4.4.1.16]	-	2	ko00450,Selenocompound metabolism;ko00730,Thiamine metabolism
PROKKA_01003	K06861	lptB	lipopolysaccharide export system ATP-binding protein	EC:3.6.3.-	1	ko02010,ABC transporters
PROKKA_01006	K01507	ppa	inorganic pyrophosphatase	EC:3.6.1.1	1	ko00190,Oxidative phosphorylation
PROKKA_01007	K01507	ppa	inorganic pyrophosphatase	EC:3.6.1.1	1	ko00190,Oxidative phosphorylation
PROKKA_01040	K00969	nadD	nicotinate-nucleotide adenylyltransferase	EC:2.7.7.18	1	ko00760,Nicotinate and nicotinamide metabolism
PROKKA_01041	K00969	nadD	nicotinate-nucleotide adenylyltransferase	EC:2.7.7.18	1	ko00760,Nicotinate and nicotinamide metabolism
PROKKA_01042	K01243	mtnN, mtn, pfs	adenosylhomocysteine nucleosidase	EC:3.2.2.9	2	ko01230,Biosynthesis of amino acids;ko00270,Cysteine and methionine metabolism
PROKKA_01055	K03471	rnhC	ribonuclease HIII	EC:3.1.26.4	1	ko03030,DNA replication
PROKKA_01056	K03471	rnhC	ribonuclease HIII	EC:3.1.26.4	1	ko03030,DNA replication
PROKKA_01058	K00997	acpS	holo-[acyl-carrier protein] synthase	EC:2.7.8.7	1	ko00770,Pantothenate and CoA biosynthesis
PROKKA_01059	K00655	plsC	1-acyl-sn-glycerol-3-phosphate acyltransferase	EC:2.3.1.51	2	ko00561,Glycerolipid metabolism;ko00564,Glycerophospholipid metabolism
PROKKA_01060	K00287	folA	dihydrofolate reductase	EC:1.5.1.3	2	ko00790,Folate biosynthesis;ko00670,One carbon pool by folate
PROKKA_01077	K03584	recO	DNA repair protein RecO (recombination protein O)	-	1	ko03440,Homologous recombination
PROKKA_01078	K01880	GARS, glyS1	glycyl-tRNA synthetase	EC:6.1.1.14	1	ko00970,Aminoacyl-tRNA biosynthesis
PROKKA_01079	K01880	GARS, glyS1	glycyl-tRNA synthetase	EC:6.1.1.14	1	ko00970,Aminoacyl-tRNA biosynthesis
PROKKA_01080	K01880	GARS, glyS1	glycyl-tRNA synthetase	EC:6.1.1.14	1	ko00970,Aminoacyl-tRNA biosynthesis
PROKKA_01081	K02316	dnaG	DNA primase	EC:2.7.7.-	1	ko03030,DNA replication
PROKKA_01082	K02316	dnaG	DNA primase	EC:2.7.7.-	1	ko03030,DNA replication
PROKKA_01083	K02316	dnaG	DNA primase	EC:2.7.7.-	1	ko03030,DNA replication
PROKKA_01084	K03087	SIG2, rpoS	RNA polymerase nonessential primary-like sigma factor	-	1	ko05111,Vibrio cholerae pathogenic cycle
PROKKA_01090	K08591	plsY	glycerol-3-phosphate acyltransferase PlsY	EC:2.3.1.15	2	ko00561,Glycerolipid metabolism;ko00564,Glycerophospholipid metabolism
PROKKA_01102	K03657	uvrD, pcrA	DNA helicase II / ATP-dependent DNA helicase PcrA	EC:3.6.4.12	2	ko03420,Nucleotide excision repair;ko03430,Mismatch repair
PROKKA_01103	K03657	uvrD, pcrA	DNA helicase II / ATP-dependent DNA helicase PcrA	EC:3.6.4.12	2	ko03420,Nucleotide excision repair;ko03430,Mismatch repair
PROKKA_01104	K03657	uvrD, pcrA	DNA helicase II / ATP-dependent DNA helicase PcrA	EC:3.6.4.12	2	ko03420,Nucleotide excision repair;ko03430,Mismatch repair
PROKKA_01105	K01934	E6.3.3.2	5-formyltetrahydrofolate cyclo-ligase	EC:6.3.3.2	1	ko00670,One carbon pool by folate
PROKKA_01108	K18288	ict-Y	itaconate CoA-transferase	EC:2.8.3.-	1	ko00660,C5-Branched dibasic acid metabolism
PROKKA_01109	K18288	ict-Y	itaconate CoA-transferase	EC:2.8.3.-	1	ko00660,C5-Branched dibasic acid metabolism
PROKKA_01122	K01151	nfo	deoxyribonuclease IV	EC:3.1.21.2	1	ko03410,Base excision repair
PROKKA_01123	K02899	RP-L27, MRPL27, rpmA	large subunit ribosomal protein L27	-	1	ko03010,Ribosome
PROKKA_01125	K02888	RP-L21, MRPL21, rplU	large subunit ribosomal protein L21	-	1	ko03010,Ribosome
PROKKA_01126	K11085	msbA	ATP-binding cassette, subfamily B, bacterial MsbA	EC:3.6.3.-	1	ko02010,ABC transporters
PROKKA_01132	K02799	PTS-Mtl-EIIB, mtlA	PTS system, mannitol-specific IIB component	EC:2.7.1.69	2	ko00051,Fructose and mannose metabolism;ko02060,Phosphotransferase system (PTS)
PROKKA_01133	K02799	PTS-Mtl-EIIB, mtlA	PTS system, mannitol-specific IIB component	EC:2.7.1.69	2	ko00051,Fructose and mannose metabolism;ko02060,Phosphotransferase system (PTS)
PROKKA_01134	K02799	PTS-Mtl-EIIB, mtlA	PTS system, mannitol-specific IIB component	EC:2.7.1.69	2	ko00051,Fructose and mannose metabolism;ko02060,Phosphotransferase system (PTS)
PROKKA_01135	K01890	FARSB, pheT	phenylalanyl-tRNA synthetase beta chain	EC:6.1.1.20	1	ko00970,Aminoacyl-tRNA biosynthesis
PROKKA_01136	K01890	FARSB, pheT	phenylalanyl-tRNA synthetase beta chain	EC:6.1.1.20	1	ko00970,Aminoacyl-tRNA biosynthesis
PROKKA_01137	K01890	FARSB, pheT	phenylalanyl-tRNA synthetase beta chain	EC:6.1.1.20	1	ko00970,Aminoacyl-tRNA biosynthesis
PROKKA_01138	K01890	FARSB, pheT	phenylalanyl-tRNA synthetase beta chain	EC:6.1.1.20	1	ko00970,Aminoacyl-tRNA biosynthesis
PROKKA_01139	K01889	FARSA, pheS	phenylalanyl-tRNA synthetase alpha chain	EC:6.1.1.20	1	ko00970,Aminoacyl-tRNA biosynthesis
PROKKA_01140	K01889	FARSA, pheS	phenylalanyl-tRNA synthetase alpha chain	EC:6.1.1.20	1	ko00970,Aminoacyl-tRNA biosynthesis
PROKKA_01141	K02887	RP-L20, MRPL20, rplT	large subunit ribosomal protein L20	-	1	ko03010,Ribosome
PROKKA_01142	K02916	RP-L35, MRPL35, rpmI	large subunit ribosomal protein L35	-	1	ko03010,Ribosome
PROKKA_01145	K00560	thyA, TYMS	thymidylate synthase	EC:2.1.1.45	2	ko00240,Pyrimidine metabolism;ko00670,One carbon pool by folate
PROKKA_01146	K03703	uvrC	excinuclease ABC subunit C	-	1	ko03420,Nucleotide excision repair
PROKKA_01149	K01662	dxs	1-deoxy-D-xylulose-5-phosphate synthase	EC:2.2.1.7	2	ko00730,Thiamine metabolism;ko00900,Terpenoid backbone biosynthesis
PROKKA_01150	K01662	dxs	1-deoxy-D-xylulose-5-phosphate synthase	EC:2.2.1.7	2	ko00730,Thiamine metabolism;ko00900,Terpenoid backbone biosynthesis
PROKKA_01155	K01838	pgmB	beta-phosphoglucomutase	EC:5.4.2.6	1	ko00500,Starch and sucrose metabolism
PROKKA_01159	K03471	rnhC	ribonuclease HIII	EC:3.1.26.4	1	ko03030,DNA replication
PROKKA_01172	K01520	dut, DUT	dUTP pyrophosphatase	EC:3.6.1.23	1	ko00240,Pyrimidine metabolism
PROKKA_01175	K03101	lspA	signal peptidase II	EC:3.4.23.36	1	ko03060,Protein export
PROKKA_01176	K03101	lspA	signal peptidase II	EC:3.4.23.36	1	ko03060,Protein export
PROKKA_01183	K03043	rpoB	DNA-directed RNA polymerase subunit beta	EC:2.7.7.6	3	ko00230,Purine metabolism;ko00240,Pyrimidine metabolism;ko03020,RNA polymerase
PROKKA_01184	K03043	rpoB	DNA-directed RNA polymerase subunit beta	EC:2.7.7.6	3	ko00230,Purine metabolism;ko00240,Pyrimidine metabolism;ko03020,RNA polymerase
PROKKA_01185	K03043	rpoB	DNA-directed RNA polymerase subunit beta	EC:2.7.7.6	3	ko00230,Purine metabolism;ko00240,Pyrimidine metabolism;ko03020,RNA polymerase
PROKKA_01186	K03043	rpoB	DNA-directed RNA polymerase subunit beta	EC:2.7.7.6	3	ko00230,Purine metabolism;ko00240,Pyrimidine metabolism;ko03020,RNA polymerase
PROKKA_01187	K03046	rpoC	DNA-directed RNA polymerase subunit beta'	EC:2.7.7.6	3	ko00230,Purine metabolism;ko00240,Pyrimidine metabolism;ko03020,RNA polymerase
PROKKA_01188	K03046	rpoC	DNA-directed RNA polymerase subunit beta'	EC:2.7.7.6	3	ko00230,Purine metabolism;ko00240,Pyrimidine metabolism;ko03020,RNA polymerase
PROKKA_01189	K03046	rpoC	DNA-directed RNA polymerase subunit beta'	EC:2.7.7.6	3	ko00230,Purine metabolism;ko00240,Pyrimidine metabolism;ko03020,RNA polymerase
PROKKA_01190	K03046	rpoC	DNA-directed RNA polymerase subunit beta'	EC:2.7.7.6	3	ko00230,Purine metabolism;ko00240,Pyrimidine metabolism;ko03020,RNA polymerase
PROKKA_01191	K03046	rpoC	DNA-directed RNA polymerase subunit beta'	EC:2.7.7.6	3	ko00230,Purine metabolism;ko00240,Pyrimidine metabolism;ko03020,RNA polymerase
PROKKA_01206	K02044	phnD	phosphonate transport system substrate-binding protein	-	1	ko02010,ABC transporters
PROKKA_01207	K02044	phnD	phosphonate transport system substrate-binding protein	-	1	ko02010,ABC transporters
PROKKA_01208	K02041	phnC	phosphonate transport system ATP-binding protein	EC:3.6.3.28	1	ko02010,ABC transporters
PROKKA_01209	K02042	phnE	phosphonate transport system permease protein	-	1	ko02010,ABC transporters
PROKKA_01210	K02042	phnE	phosphonate transport system permease protein	-	1	ko02010,ABC transporters
PROKKA_01212	K01881	PARS, proS	prolyl-tRNA synthetase	EC:6.1.1.15	1	ko00970,Aminoacyl-tRNA biosynthesis
PROKKA_01218	K00956	cysN	sulfate adenylyltransferase subunit 1	EC:2.7.7.4	3	ko00920,Sulfur metabolism;ko00230,Purine metabolism;ko00450,Selenocompound metabolism
PROKKA_01223	K01890	FARSB, pheT	phenylalanyl-tRNA synthetase beta chain	EC:6.1.1.20	1	ko00970,Aminoacyl-tRNA biosynthesis
PROKKA_01235	K02337	DPO3A1, dnaE	DNA polymerase III subunit alpha	EC:2.7.7.7	5	ko00230,Purine metabolism;ko00240,Pyrimidine metabolism;ko03030,DNA replication;ko03430,Mismatch repair;ko03440,Homologous recombination
PROKKA_01236	K02337	DPO3A1, dnaE	DNA polymerase III subunit alpha	EC:2.7.7.7	5	ko00230,Purine metabolism;ko00240,Pyrimidine metabolism;ko03030,DNA replication;ko03430,Mismatch repair;ko03440,Homologous recombination
PROKKA_01237	K02337	DPO3A1, dnaE	DNA polymerase III subunit alpha	EC:2.7.7.7	5	ko00230,Purine metabolism;ko00240,Pyrimidine metabolism;ko03030,DNA replication;ko03430,Mismatch repair;ko03440,Homologous recombination
PROKKA_01238	K02337	DPO3A1, dnaE	DNA polymerase III subunit alpha	EC:2.7.7.7	5	ko00230,Purine metabolism;ko00240,Pyrimidine metabolism;ko03030,DNA replication;ko03430,Mismatch repair;ko03440,Homologous recombination
PROKKA_01239	K02337	DPO3A1, dnaE	DNA polymerase III subunit alpha	EC:2.7.7.7	5	ko00230,Purine metabolism;ko00240,Pyrimidine metabolism;ko03030,DNA replication;ko03430,Mismatch repair;ko03440,Homologous recombination
PROKKA_01240	K02335	DPO1, polA	DNA polymerase I	EC:2.7.7.7	6	ko00230,Purine metabolism;ko00240,Pyrimidine metabolism;ko03030,DNA replication;ko03410,Base excision repair;ko03420,Nucleotide excision repair;ko03440,Homologous recombination
PROKKA_01241	K10563	mutM, fpg	formamidopyrimidine-DNA glycosylase [EC:3.2.2.23 4.2.99.18]	-	1	ko03410,Base excision repair
PROKKA_01242	K00859	coaE	dephospho-CoA kinase	EC:2.7.1.24	1	ko00770,Pantothenate and CoA biosynthesis
PROKKA_01249	K01535	E3.6.3.6	H+-transporting ATPase	EC:3.6.3.6	1	ko00190,Oxidative phosphorylation
PROKKA_01251	K01535	E3.6.3.6	H+-transporting ATPase	EC:3.6.3.6	1	ko00190,Oxidative phosphorylation
PROKKA_01252	K01535	E3.6.3.6	H+-transporting ATPase	EC:3.6.3.6	1	ko00190,Oxidative phosphorylation
PROKKA_01255	K01893	NARS, asnS	asparaginyl-tRNA synthetase	EC:6.1.1.22	1	ko00970,Aminoacyl-tRNA biosynthesis
PROKKA_01256	K01893	NARS, asnS	asparaginyl-tRNA synthetase	EC:6.1.1.22	1	ko00970,Aminoacyl-tRNA biosynthesis
PROKKA_01257	K01893	NARS, asnS	asparaginyl-tRNA synthetase	EC:6.1.1.22	1	ko00970,Aminoacyl-tRNA biosynthesis
PROKKA_01258	K00995	E2.7.8.5, pgsA, PGS1	CDP-diacylglycerol--glycerol-3-phosphate 3-phosphatidyltransferase	EC:2.7.8.5	1	ko00564,Glycerophospholipid metabolism
PROKKA_01269	K10112	msmX, msmK, malK, sugC, ggtA, msiK	multiple sugar transport system ATP-binding protein	-	1	ko02010,ABC transporters
PROKKA_01270	K10112	msmX, msmK, malK, sugC, ggtA, msiK	multiple sugar transport system ATP-binding protein	-	1	ko02010,ABC transporters
PROKKA_01309	K00759	APRT, apt	adenine phosphoribosyltransferase	EC:2.4.2.7	1	ko00230,Purine metabolism
PROKKA_01310	K12257	secDF	SecD/SecF fusion protein	-	2	ko03060,Protein export;ko03070,Bacterial secretion system
PROKKA_01311	K12257	secDF	SecD/SecF fusion protein	-	2	ko03060,Protein export;ko03070,Bacterial secretion system
PROKKA_01312	K12257	secDF	SecD/SecF fusion protein	-	2	ko03060,Protein export;ko03070,Bacterial secretion system
PROKKA_01313	K12257	secDF	SecD/SecF fusion protein	-	2	ko03060,Protein export;ko03070,Bacterial secretion system
PROKKA_01314	K01937	E6.3.4.2, pyrG	CTP synthase	EC:6.3.4.2	1	ko00240,Pyrimidine metabolism
PROKKA_01315	K01937	E6.3.4.2, pyrG	CTP synthase	EC:6.3.4.2	1	ko00240,Pyrimidine metabolism
PROKKA_01316	K00951	relA	GTP pyrophosphokinase	EC:2.7.6.5	1	ko00230,Purine metabolism
PROKKA_01317	K00951	relA	GTP pyrophosphokinase	EC:2.7.6.5	1	ko00230,Purine metabolism
PROKKA_01318	K00951	relA	GTP pyrophosphokinase	EC:2.7.6.5	1	ko00230,Purine metabolism
PROKKA_01319	K00951	relA	GTP pyrophosphokinase	EC:2.7.6.5	1	ko00230,Purine metabolism
PROKKA_01320	K01876	DARS, aspS	aspartyl-tRNA synthetase	EC:6.1.1.12	1	ko00970,Aminoacyl-tRNA biosynthesis
PROKKA_01321	K01876	DARS, aspS	aspartyl-tRNA synthetase	EC:6.1.1.12	1	ko00970,Aminoacyl-tRNA biosynthesis
PROKKA_01322	K01876	DARS, aspS	aspartyl-tRNA synthetase	EC:6.1.1.12	1	ko00970,Aminoacyl-tRNA biosynthesis
PROKKA_01323	K01892	HARS, hisS	histidyl-tRNA synthetase	EC:6.1.1.21	1	ko00970,Aminoacyl-tRNA biosynthesis
PROKKA_01324	K01892	HARS, hisS	histidyl-tRNA synthetase	EC:6.1.1.21	1	ko00970,Aminoacyl-tRNA biosynthesis
PROKKA_01325	K01892	HARS, hisS	histidyl-tRNA synthetase	EC:6.1.1.21	1	ko00970,Aminoacyl-tRNA biosynthesis
PROKKA_01354	K01868	TARS, thrS	threonyl-tRNA synthetase	EC:6.1.1.3	1	ko00970,Aminoacyl-tRNA biosynthesis
PROKKA_01355	K01868	TARS, thrS	threonyl-tRNA synthetase	EC:6.1.1.3	1	ko00970,Aminoacyl-tRNA biosynthesis
PROKKA_01356	K01868	TARS, thrS	threonyl-tRNA synthetase	EC:6.1.1.3	1	ko00970,Aminoacyl-tRNA biosynthesis
PROKKA_01360	K03110	ftsY	fused signal recognition particle receptor	-	2	ko03060,Protein export;ko03070,Bacterial secretion system
PROKKA_01361	K03110	ftsY	fused signal recognition particle receptor	-	2	ko03060,Protein export;ko03070,Bacterial secretion system
PROKKA_01367	K02495	hemN, hemZ	oxygen-independent coproporphyrinogen III oxidase	EC:1.3.99.22	1	ko00860,Porphyrin and chlorophyll metabolism
PROKKA_01397	K00945	cmk	cytidylate kinase	EC:2.7.4.14	1	ko00240,Pyrimidine metabolism
PROKKA_01398	K00945	cmk	cytidylate kinase	EC:2.7.4.14	1	ko00240,Pyrimidine metabolism
PROKKA_01402	K01874	MARS, metG	methionyl-tRNA synthetase	EC:6.1.1.10	2	ko00450,Selenocompound metabolism;ko00970,Aminoacyl-tRNA biosynthesis
PROKKA_01403	K01874	MARS, metG	methionyl-tRNA synthetase	EC:6.1.1.10	2	ko00450,Selenocompound metabolism;ko00970,Aminoacyl-tRNA biosynthesis
PROKKA_01404	K01874	MARS, metG	methionyl-tRNA synthetase	EC:6.1.1.10	2	ko00450,Selenocompound metabolism;ko00970,Aminoacyl-tRNA biosynthesis
PROKKA_01415	K01874	MARS, metG	methionyl-tRNA synthetase	EC:6.1.1.10	2	ko00450,Selenocompound metabolism;ko00970,Aminoacyl-tRNA biosynthesis
PROKKA_01416	K01874	MARS, metG	methionyl-tRNA synthetase	EC:6.1.1.10	2	ko00450,Selenocompound metabolism;ko00970,Aminoacyl-tRNA biosynthesis
PROKKA_01425	K02911	RP-L32, MRPL32, rpmF	large subunit ribosomal protein L32	-	1	ko03010,Ribosome
PROKKA_01426	K02935	RP-L7, MRPL12, rplL	large subunit ribosomal protein L7/L12	-	1	ko03010,Ribosome
PROKKA_01427	K02864	RP-L10, MRPL10, rplJ	large subunit ribosomal protein L10	-	1	ko03010,Ribosome
PROKKA_01434	K01808	rpiB	ribose 5-phosphate isomerase B	EC:5.3.1.6	5	ko01200,Carbon metabolism;ko01230,Biosynthesis of amino acids;ko00030,Pentose phosphate pathway;ko00051,Fructose and mannose metabolism;ko00710,Carbon fixation in photosynthetic organisms
PROKKA_01440	K02909	RP-L31, rpmE	large subunit ribosomal protein L31	-	1	ko03010,Ribosome
PROKKA_01441	K00131	gapN	glyceraldehyde-3-phosphate dehydrogenase (NADP+)	EC:1.2.1.9	3	ko01200,Carbon metabolism;ko00010,Glycolysis / Gluconeogenesis;ko00030,Pentose phosphate pathway
PROKKA_01442	K00131	gapN	glyceraldehyde-3-phosphate dehydrogenase (NADP+)	EC:1.2.1.9	3	ko01200,Carbon metabolism;ko00010,Glycolysis / Gluconeogenesis;ko00030,Pentose phosphate pathway
PROKKA_01443	K00131	gapN	glyceraldehyde-3-phosphate dehydrogenase (NADP+)	EC:1.2.1.9	3	ko01200,Carbon metabolism;ko00010,Glycolysis / Gluconeogenesis;ko00030,Pentose phosphate pathway
PROKKA_01444	K00131	gapN	glyceraldehyde-3-phosphate dehydrogenase (NADP+)	EC:1.2.1.9	3	ko01200,Carbon metabolism;ko00010,Glycolysis / Gluconeogenesis;ko00030,Pentose phosphate pathway
PROKKA_01445	K00131	gapN	glyceraldehyde-3-phosphate dehydrogenase (NADP+)	EC:1.2.1.9	3	ko01200,Carbon metabolism;ko00010,Glycolysis / Gluconeogenesis;ko00030,Pentose phosphate pathway
PROKKA_01446	K02777	PTS-Glc-EIIA, crr	PTS system, glucose-specific IIA component	EC:2.7.1.69	4	ko00010,Glycolysis / Gluconeogenesis;ko00500,Starch and sucrose metabolism;ko00520,Amino sugar and nucleotide sugar metabolism;ko02060,Phosphotransferase system (PTS)
PROKKA_01447	K02777	PTS-Glc-EIIA, crr	PTS system, glucose-specific IIA component	EC:2.7.1.69	4	ko00010,Glycolysis / Gluconeogenesis;ko00500,Starch and sucrose metabolism;ko00520,Amino sugar and nucleotide sugar metabolism;ko02060,Phosphotransferase system (PTS)
PROKKA_01448	K02777	PTS-Glc-EIIA, crr	PTS system, glucose-specific IIA component	EC:2.7.1.69	4	ko00010,Glycolysis / Gluconeogenesis;ko00500,Starch and sucrose metabolism;ko00520,Amino sugar and nucleotide sugar metabolism;ko02060,Phosphotransferase system (PTS)
PROKKA_01449	K02777	PTS-Glc-EIIA, crr	PTS system, glucose-specific IIA component	EC:2.7.1.69	4	ko00010,Glycolysis / Gluconeogenesis;ko00500,Starch and sucrose metabolism;ko00520,Amino sugar and nucleotide sugar metabolism;ko02060,Phosphotransferase system (PTS)
PROKKA_01462	K00604	MTFMT, fmt	methionyl-tRNA formyltransferase	EC:2.1.2.9	2	ko00670,One carbon pool by folate;ko00970,Aminoacyl-tRNA biosynthesis
PROKKA_01463	K00604	MTFMT, fmt	methionyl-tRNA formyltransferase	EC:2.1.2.9	2	ko00670,One carbon pool by folate;ko00970,Aminoacyl-tRNA biosynthesis
PROKKA_01467	K02968	RP-S20, rpsT	small subunit ribosomal protein S20	-	1	ko03010,Ribosome
PROKKA_01470	K08303	K08303	putative protease	EC:3.4.-.-	1	ko05120,Epithelial cell signaling in Helicobacter pylori infection
PROKKA_01475	K01872	AARS, alaS	alanyl-tRNA synthetase	EC:6.1.1.7	1	ko00970,Aminoacyl-tRNA biosynthesis
PROKKA_01476	K01872	AARS, alaS	alanyl-tRNA synthetase	EC:6.1.1.7	1	ko00970,Aminoacyl-tRNA biosynthesis
PROKKA_01477	K01872	AARS, alaS	alanyl-tRNA synthetase	EC:6.1.1.7	1	ko00970,Aminoacyl-tRNA biosynthesis
PROKKA_01478	K01872	AARS, alaS	alanyl-tRNA synthetase	EC:6.1.1.7	1	ko00970,Aminoacyl-tRNA biosynthesis
PROKKA_01479	K01872	AARS, alaS	alanyl-tRNA synthetase	EC:6.1.1.7	1	ko00970,Aminoacyl-tRNA biosynthesis
PROKKA_01480	K18288	ict-Y	itaconate CoA-transferase	EC:2.8.3.-	1	ko00660,C5-Branched dibasic acid metabolism
PROKKA_01481	K00566	mnmA, trmU, TRMU	tRNA-specific 2-thiouridylase	EC:2.8.1.-	1	ko04122,Sulfur relay system
PROKKA_01482	K11753	ribF	riboflavin kinase / FMN adenylyltransferase [EC:2.7.1.26 2.7.7.2]	-	1	ko00740,Riboflavin metabolism
PROKKA_01483	K11753	ribF	riboflavin kinase / FMN adenylyltransferase [EC:2.7.1.26 2.7.7.2]	-	1	ko00740,Riboflavin metabolism
PROKKA_01495	K10542	mglA	methyl-galactoside transport system ATP-binding protein	EC:3.6.3.17	1	ko02010,ABC transporters
PROKKA_01496	K10441	rbsA	ribose transport system ATP-binding protein	EC:3.6.3.17	1	ko02010,ABC transporters
PROKKA_01504	K03784	deoD	purine-nucleoside phosphorylase	EC:2.4.2.1	3	ko00230,Purine metabolism;ko00240,Pyrimidine metabolism;ko00760,Nicotinate and nicotinamide metabolism
PROKKA_01505	K03784	deoD	purine-nucleoside phosphorylase	EC:2.4.2.1	3	ko00230,Purine metabolism;ko00240,Pyrimidine metabolism;ko00760,Nicotinate and nicotinamide metabolism
PROKKA_01506	K01619	deoC, DERA	deoxyribose-phosphate aldolase	EC:4.1.2.4	1	ko00030,Pentose phosphate pathway
PROKKA_01507	K00758	deoA, TYMP	thymidine phosphorylase	EC:2.4.2.4	3	ko00240,Pyrimidine metabolism;ko00983,Drug metabolism - other enzymes;ko05219,Bladder cancer
PROKKA_01508	K00758	deoA, TYMP	thymidine phosphorylase	EC:2.4.2.4	3	ko00240,Pyrimidine metabolism;ko00983,Drug metabolism - other enzymes;ko05219,Bladder cancer
PROKKA_01509	K00758	deoA, TYMP	thymidine phosphorylase	EC:2.4.2.4	3	ko00240,Pyrimidine metabolism;ko00983,Drug metabolism - other enzymes;ko05219,Bladder cancer
PROKKA_01510	K01489	cdd, CDA	cytidine deaminase	EC:3.5.4.5	2	ko00240,Pyrimidine metabolism;ko00983,Drug metabolism - other enzymes
PROKKA_01511	K01840	manB	phosphomannomutase	EC:5.4.2.8	2	ko00051,Fructose and mannose metabolism;ko00520,Amino sugar and nucleotide sugar metabolism
PROKKA_01512	K01840	manB	phosphomannomutase	EC:5.4.2.8	2	ko00051,Fructose and mannose metabolism;ko00520,Amino sugar and nucleotide sugar metabolism
PROKKA_01513	K01840	manB	phosphomannomutase	EC:5.4.2.8	2	ko00051,Fructose and mannose metabolism;ko00520,Amino sugar and nucleotide sugar metabolism
PROKKA_01514	K01803	TPI, tpiA	triosephosphate isomerase (TIM)	EC:5.3.1.1	6	ko01200,Carbon metabolism;ko01230,Biosynthesis of amino acids;ko00010,Glycolysis / Gluconeogenesis;ko00051,Fructose and mannose metabolism;ko00562,Inositol phosphate metabolism;ko00710,Carbon fixation in photosynthetic organisms
PROKKA_01515	K15633	gpmI	2,3-bisphosphoglycerate-independent phosphoglycerate mutase	EC:5.4.2.12	5	ko01200,Carbon metabolism;ko01230,Biosynthesis of amino acids;ko00010,Glycolysis / Gluconeogenesis;ko00680,Methane metabolism;ko00260,Glycine, serine and threonine metabolism
PROKKA_01516	K16786	ecfA1	energy-coupling factor transport system ATP-binding protein	EC:3.6.3.-	1	ko02010,ABC transporters
PROKKA_01517	K16787	ecfA2	energy-coupling factor transport system ATP-binding protein	EC:3.6.3.-	1	ko02010,ABC transporters
PROKKA_01518	K16785	ecfT	energy-coupling factor transport system permease protein	-	1	ko02010,ABC transporters
PROKKA_01519	K16785	ecfT	energy-coupling factor transport system permease protein	-	1	ko02010,ABC transporters
PROKKA_01520	K16785	ecfT	energy-coupling factor transport system permease protein	-	1	ko02010,ABC transporters
PROKKA_01523	K00948	PRPS, prsA	ribose-phosphate pyrophosphokinase	EC:2.7.6.1	4	ko01200,Carbon metabolism;ko01230,Biosynthesis of amino acids;ko00030,Pentose phosphate pathway;ko00230,Purine metabolism
PROKKA_01528	K14597	cruC	chlorobactene glucosyltransferase	-	1	ko00906,Carotenoid biosynthesis
PROKKA_01530	K00615	E2.2.1.1, tktA, tktB	transketolase	EC:2.2.1.1	5	ko01200,Carbon metabolism;ko01230,Biosynthesis of amino acids;ko00030,Pentose phosphate pathway;ko00710,Carbon fixation in photosynthetic organisms;ko01051,Biosynthesis of ansamycins
PROKKA_01531	K00615	E2.2.1.1, tktA, tktB	transketolase	EC:2.2.1.1	5	ko01200,Carbon metabolism;ko01230,Biosynthesis of amino acids;ko00030,Pentose phosphate pathway;ko00710,Carbon fixation in photosynthetic organisms;ko01051,Biosynthesis of ansamycins
PROKKA_01532	K00615	E2.2.1.1, tktA, tktB	transketolase	EC:2.2.1.1	5	ko01200,Carbon metabolism;ko01230,Biosynthesis of amino acids;ko00030,Pentose phosphate pathway;ko00710,Carbon fixation in photosynthetic organisms;ko01051,Biosynthesis of ansamycins
PROKKA_01535	K01873	VARS, valS	valyl-tRNA synthetase	EC:6.1.1.9	1	ko00970,Aminoacyl-tRNA biosynthesis
PROKKA_01536	K01873	VARS, valS	valyl-tRNA synthetase	EC:6.1.1.9	1	ko00970,Aminoacyl-tRNA biosynthesis
PROKKA_01537	K01873	VARS, valS	valyl-tRNA synthetase	EC:6.1.1.9	1	ko00970,Aminoacyl-tRNA biosynthesis
PROKKA_01538	K01873	VARS, valS	valyl-tRNA synthetase	EC:6.1.1.9	1	ko00970,Aminoacyl-tRNA biosynthesis
PROKKA_01539	K01873	VARS, valS	valyl-tRNA synthetase	EC:6.1.1.9	1	ko00970,Aminoacyl-tRNA biosynthesis
PROKKA_01540	K01873	VARS, valS	valyl-tRNA synthetase	EC:6.1.1.9	1	ko00970,Aminoacyl-tRNA biosynthesis
PROKKA_01541	K01873	VARS, valS	valyl-tRNA synthetase	EC:6.1.1.9	1	ko00970,Aminoacyl-tRNA biosynthesis
PROKKA_01543	K02340	DPO3D1, holA	DNA polymerase III subunit delta	EC:2.7.7.7	5	ko00230,Purine metabolism;ko00240,Pyrimidine metabolism;ko03030,DNA replication;ko03430,Mismatch repair;ko03440,Homologous recombination
PROKKA_01544	K02340	DPO3D1, holA	DNA polymerase III subunit delta	EC:2.7.7.7	5	ko00230,Purine metabolism;ko00240,Pyrimidine metabolism;ko03030,DNA replication;ko03430,Mismatch repair;ko03440,Homologous recombination
