# Supplementary material for: Drug sensitivity and genome-wide analysis of two strains of Mycoplasma gallisepticum with different biofilm intensity
Source: Front Microbiol. 2023 Aug 9;14:1196747. doi: 10.3389/fmicb.2023.1196747 (PMC10445764; doi:10.3389/fmicb.2023.1196747)
Supplement: Supplementary file 2 [file Table_2.XLS]

Gene_ID	COG_ID	COG_name	Code	Name
PROKKA_00004	COG0057	Glyceraldehyde-3-phosphate dehydrogenase/erythrose-4-phosphate dehydrogenase	G	Carbohydrate transport and metabolism ;
PROKKA_00025	COG0481	Membrane GTPase LepA	M	Cell wall/membrane/envelope biogenesis ;
PROKKA_00036	COG0561	Predicted hydrolases of the HAD superfamily	R	General function prediction only ;
PROKKA_00037	COG0561	Predicted hydrolases of the HAD superfamily	R	General function prediction only ;
PROKKA_00039	COG0561	Predicted hydrolases of the HAD superfamily	R	General function prediction only ;
PROKKA_00041	COG0180	Tryptophanyl-tRNA synthetase	J	Translation, ribosomal structure and biogenesis ;
PROKKA_00042	COG1393	Arsenate reductase and related proteins, glutaredoxin family	P	Inorganic ion transport and metabolism ;
PROKKA_00043	COG0061	Predicted sugar kinase	G	Carbohydrate transport and metabolism ;
PROKKA_00053	COG0443	Molecular chaperone	O	Posttranslational modification, protein turnover, chaperones ;
PROKKA_00054	COG0443	Molecular chaperone	O	Posttranslational modification, protein turnover, chaperones ;
PROKKA_00065	COG0522	Ribosomal protein S4 and related proteins	J	Translation, ribosomal structure and biogenesis ;
PROKKA_00066	COG0048	Ribosomal protein S12	J	Translation, ribosomal structure and biogenesis ;
PROKKA_00067	COG0049	Ribosomal protein S7	J	Translation, ribosomal structure and biogenesis ;
PROKKA_00068	COG0049	Ribosomal protein S7	J	Translation, ribosomal structure and biogenesis ;
PROKKA_00069	COG0480	Translation elongation factors (GTPases)	J	Translation, ribosomal structure and biogenesis ;
PROKKA_00070	COG0480	Translation elongation factors (GTPases)	J	Translation, ribosomal structure and biogenesis ;
PROKKA_00076	COG0313	Predicted methyltransferases	R	General function prediction only ;
PROKKA_00077	COG2256	ATPase related to the helicase subunit of the Holliday junction resolvase	L	Replication, recombination and repair ;
PROKKA_00078	COG2256	ATPase related to the helicase subunit of the Holliday junction resolvase	L	Replication, recombination and repair ;
PROKKA_00080	COG1182	Acyl carrier protein phosphodiesterase	I	Lipid transport and metabolism ;
PROKKA_00081	COG1182	Acyl carrier protein phosphodiesterase	I	Lipid transport and metabolism ;
PROKKA_00084	COG0052	Ribosomal protein S2	J	Translation, ribosomal structure and biogenesis ;
PROKKA_00085	COG0052	Ribosomal protein S2	J	Translation, ribosomal structure and biogenesis ;
PROKKA_00092	COG4166	ABC-type oligopeptide transport system, periplasmic component	E	Amino acid transport and metabolism ;
PROKKA_00095	COG0601	ABC-type dipeptide/oligopeptide/nickel transport systems, permease components	P	Inorganic ion transport and metabolism ;
PROKKA_00096	COG0601	ABC-type dipeptide/oligopeptide/nickel transport systems, permease components	P	Inorganic ion transport and metabolism ;
PROKKA_00101	COG1173	ABC-type dipeptide/oligopeptide/nickel transport systems, permease components	P	Inorganic ion transport and metabolism ;
PROKKA_00102	COG0444	ABC-type dipeptide/oligopeptide/nickel transport system, ATPase component	P	Inorganic ion transport and metabolism ;
PROKKA_00103	COG0444	ABC-type dipeptide/oligopeptide/nickel transport system, ATPase component	P	Inorganic ion transport and metabolism ;
PROKKA_00104	COG0444	ABC-type dipeptide/oligopeptide/nickel transport system, ATPase component	P	Inorganic ion transport and metabolism ;
PROKKA_00105	COG1124	ABC-type dipeptide/oligopeptide/nickel transport system, ATPase component	P	Inorganic ion transport and metabolism ;
PROKKA_00106	COG4608	ABC-type oligopeptide transport system, ATPase component	E	Amino acid transport and metabolism ;
PROKKA_00111	COG0601	ABC-type dipeptide/oligopeptide/nickel transport systems, permease components	P	Inorganic ion transport and metabolism ;
PROKKA_00117	COG0444	ABC-type dipeptide/oligopeptide/nickel transport system, ATPase component	P	Inorganic ion transport and metabolism ;
PROKKA_00119	COG0444	ABC-type dipeptide/oligopeptide/nickel transport system, ATPase component	P	Inorganic ion transport and metabolism ;
PROKKA_00120	COG0444	ABC-type dipeptide/oligopeptide/nickel transport system, ATPase component	P	Inorganic ion transport and metabolism ;
PROKKA_00122	COG4608	ABC-type oligopeptide transport system, ATPase component	E	Amino acid transport and metabolism ;
PROKKA_00126	COG0231	Translation elongation factor P (EF-P)/translation initiation factor 5A (eIF-5A)	J	Translation, ribosomal structure and biogenesis ;
PROKKA_00131	COG0537	Diadenosine tetraphosphate (Ap4A) hydrolase and other HIT family hydrolases	R	General function prediction only ;
PROKKA_00135	COG0148	Enolase	G	Carbohydrate transport and metabolism ;
PROKKA_00136	COG0148	Enolase	G	Carbohydrate transport and metabolism ;
PROKKA_00137	COG0148	Enolase	G	Carbohydrate transport and metabolism ;
PROKKA_00138	COG0513	Superfamily II DNA and RNA helicases	J	Translation, ribosomal structure and biogenesis ;
PROKKA_00139	COG0513	Superfamily II DNA and RNA helicases	J	Translation, ribosomal structure and biogenesis ;
PROKKA_00149	COG0301	Thiamine biosynthesis ATP pyrophosphatase	H	Coenzyme transport and metabolism ;
PROKKA_00150	COG0618	Exopolyphosphatase-related proteins	R	General function prediction only ;
PROKKA_00153	COG0566	rRNA methylases	J	Translation, ribosomal structure and biogenesis ;
PROKKA_00154	COG0564	Pseudouridylate synthases, 23S RNA-specific	J	Translation, ribosomal structure and biogenesis ;
PROKKA_00156	COG1461	Predicted kinase related to dihydroxyacetone kinase	R	General function prediction only ;
PROKKA_00157	COG0416	Fatty acid/phospholipid biosynthesis enzyme	I	Lipid transport and metabolism ;
PROKKA_00158	COG0416	Fatty acid/phospholipid biosynthesis enzyme	I	Lipid transport and metabolism ;
PROKKA_00160	COG0571	dsRNA-specific ribonuclease	K	Transcription ;
PROKKA_00161	COG0542	ATPases with chaperone activity, ATP-binding subunit	O	Posttranslational modification, protein turnover, chaperones ;
PROKKA_00162	COG0542	ATPases with chaperone activity, ATP-binding subunit	O	Posttranslational modification, protein turnover, chaperones ;
PROKKA_00163	COG0542	ATPases with chaperone activity, ATP-binding subunit	O	Posttranslational modification, protein turnover, chaperones ;
PROKKA_00164	COG1428	Deoxynucleoside kinases	F	Nucleotide transport and metabolism ;
PROKKA_00165	COG1428	Deoxynucleoside kinases	F	Nucleotide transport and metabolism ;
PROKKA_00166	COG1253	Hemolysins and related proteins containing CBS domains	R	General function prediction only ;
PROKKA_00168	COG1253	Hemolysins and related proteins containing CBS domains	R	General function prediction only ;
PROKKA_00173	COG0168	Trk-type K+ transport systems, membrane components	P	Inorganic ion transport and metabolism ;
PROKKA_00174	COG0282	Acetate kinase	C	Energy production and conversion ;
PROKKA_00175	COG0282	Acetate kinase	C	Energy production and conversion ;
PROKKA_00176	COG0282	Acetate kinase	C	Energy production and conversion ;
PROKKA_00177	COG0446	Uncharacterized NAD(FAD)-dependent dehydrogenases	R	General function prediction only ;
PROKKA_00178	COG0446	Uncharacterized NAD(FAD)-dependent dehydrogenases	R	General function prediction only ;
PROKKA_00179	COG1249	Pyruvate/2-oxoglutarate dehydrogenase complex, dihydrolipoamide dehydrogenase (E3) component, and related enzymes	C	Energy production and conversion ;
PROKKA_00180	COG1071	Pyruvate/2-oxoglutarate dehydrogenase complex, dehydrogenase (E1) component, eukaryotic type, alpha subunit	C	Energy production and conversion ;
PROKKA_00181	COG1071	Pyruvate/2-oxoglutarate dehydrogenase complex, dehydrogenase (E1) component, eukaryotic type, alpha subunit	C	Energy production and conversion ;
PROKKA_00183	COG0022	Pyruvate/2-oxoglutarate dehydrogenase complex, dehydrogenase (E1) component, eukaryotic type, beta subunit	C	Energy production and conversion ;
PROKKA_00184	COG0022	Pyruvate/2-oxoglutarate dehydrogenase complex, dehydrogenase (E1) component, eukaryotic type, beta subunit	C	Energy production and conversion ;
PROKKA_00186	COG0508	Pyruvate/2-oxoglutarate dehydrogenase complex, dihydrolipoamide acyltransferase (E2) component, and related enzymes	C	Energy production and conversion ;
PROKKA_00187	COG1249	Pyruvate/2-oxoglutarate dehydrogenase complex, dihydrolipoamide dehydrogenase (E3) component, and related enzymes	C	Energy production and conversion ;
PROKKA_00188	COG1249	Pyruvate/2-oxoglutarate dehydrogenase complex, dihydrolipoamide dehydrogenase (E3) component, and related enzymes	C	Energy production and conversion ;
PROKKA_00189	COG0095	Lipoate-protein ligase A	H	Coenzyme transport and metabolism ;
PROKKA_00191	COG0205	6-phosphofructokinase	G	Carbohydrate transport and metabolism ;
PROKKA_00192	COG0469	Pyruvate kinase	G	Carbohydrate transport and metabolism ;
PROKKA_00193	COG0234	Co-chaperonin GroES (HSP10)	O	Posttranslational modification, protein turnover, chaperones ;
PROKKA_00194	COG0459	Chaperonin GroEL (HSP60 family)	O	Posttranslational modification, protein turnover, chaperones ;
PROKKA_00195	COG0229	Conserved domain frequently associated with peptide methionine sulfoxide reductase	O	Posttranslational modification, protein turnover, chaperones ;
PROKKA_00196	COG0229	Conserved domain frequently associated with peptide methionine sulfoxide reductase	O	Posttranslational modification, protein turnover, chaperones ;
PROKKA_00198	COG3328	Transposase and inactivated derivatives	L	Replication, recombination and repair ;
PROKKA_00199	COG3328	Transposase and inactivated derivatives	L	Replication, recombination and repair ;
PROKKA_00201	COG3328	Transposase and inactivated derivatives	L	Replication, recombination and repair ;
PROKKA_00202	COG3328	Transposase and inactivated derivatives	L	Replication, recombination and repair ;
PROKKA_00204	COG0468	RecA/RadA recombinase	L	Replication, recombination and repair ;
PROKKA_00209	COG3842	ABC-type spermidine/putrescine transport systems, ATPase components	E	Amino acid transport and metabolism ;
PROKKA_00210	COG3842	ABC-type spermidine/putrescine transport systems, ATPase components	E	Amino acid transport and metabolism ;
PROKKA_00212	COG1176	ABC-type spermidine/putrescine transport system, permease component I	E	Amino acid transport and metabolism ;
PROKKA_00213	COG1176	ABC-type spermidine/putrescine transport system, permease component I	E	Amino acid transport and metabolism ;
PROKKA_00215	COG1177	ABC-type spermidine/putrescine transport system, permease component II	E	Amino acid transport and metabolism ;
PROKKA_00218	COG0533	Metal-dependent proteases with possible chaperone activity	O	Posttranslational modification, protein turnover, chaperones ;
PROKKA_00219	COG0192	S-adenosylmethionine synthetase	H	Coenzyme transport and metabolism ;
PROKKA_00220	COG0192	S-adenosylmethionine synthetase	H	Coenzyme transport and metabolism ;
PROKKA_00224	COG0492	Thioredoxin reductase	O	Posttranslational modification, protein turnover, chaperones ;
PROKKA_00225	COG1481	Uncharacterized protein conserved in bacteria	S	Function unknown;
PROKKA_00228	COG0557	Exoribonuclease R	K	Transcription ;
PROKKA_00229	COG0557	Exoribonuclease R	K	Transcription ;
PROKKA_00230	COG0557	Exoribonuclease R	K	Transcription ;
PROKKA_00231	COG1624	Uncharacterized conserved protein	S	Function unknown;
PROKKA_00240	COG0260	Leucyl aminopeptidase	E	Amino acid transport and metabolism ;
PROKKA_00241	COG0260	Leucyl aminopeptidase	E	Amino acid transport and metabolism ;
PROKKA_00244	COG0536	Predicted GTPase	R	General function prediction only ;
PROKKA_00247	COG0572	Uridine kinase	F	Nucleotide transport and metabolism ;
PROKKA_00248	COG2235	Arginine deiminase	E	Amino acid transport and metabolism ;
PROKKA_00250	COG0267	Ribosomal protein L33	J	Translation, ribosomal structure and biogenesis ;
PROKKA_00252	COG0006	Xaa-Pro aminopeptidase	E	Amino acid transport and metabolism ;
PROKKA_00253	COG0006	Xaa-Pro aminopeptidase	E	Amino acid transport and metabolism ;
PROKKA_00256	COG0691	tmRNA-binding protein	O	Posttranslational modification, protein turnover, chaperones ;
PROKKA_00257	COG3579	Aminopeptidase C	E	Amino acid transport and metabolism ;
PROKKA_00260	COG3579	Aminopeptidase C	E	Amino acid transport and metabolism ;
PROKKA_00261	COG3579	Aminopeptidase C	E	Amino acid transport and metabolism ;
PROKKA_00266	COG0656	Aldo/keto reductases, related to diketogulonate reductase	R	General function prediction only ;
PROKKA_00267	COG0656	Aldo/keto reductases, related to diketogulonate reductase	R	General function prediction only ;
PROKKA_00268	COG0656	Aldo/keto reductases, related to diketogulonate reductase	R	General function prediction only ;
PROKKA_00269	COG1881	Phospholipid-binding protein	R	General function prediction only ;
PROKKA_00273	COG0495	Leucyl-tRNA synthetase	J	Translation, ribosomal structure and biogenesis ;
PROKKA_00274	COG0495	Leucyl-tRNA synthetase	J	Translation, ribosomal structure and biogenesis ;
PROKKA_00275	COG0495	Leucyl-tRNA synthetase	J	Translation, ribosomal structure and biogenesis ;
PROKKA_00276	COG0495	Leucyl-tRNA synthetase	J	Translation, ribosomal structure and biogenesis ;
PROKKA_00277	COG0569	K+ transport systems, NAD-binding component	P	Inorganic ion transport and metabolism ;
PROKKA_00299	COG1131	ABC-type multidrug transport system, ATPase component	V	Defense mechanisms ;
PROKKA_00300	COG1131	ABC-type multidrug transport system, ATPase component	V	Defense mechanisms ;
PROKKA_00305	COG3328	Transposase and inactivated derivatives	L	Replication, recombination and repair ;
PROKKA_00306	COG3328	Transposase and inactivated derivatives	L	Replication, recombination and repair ;
PROKKA_00331	COG0858	Ribosome-binding factor A	J	Translation, ribosomal structure and biogenesis ;
PROKKA_00332	COG0532	Translation initiation factor 2 (IF-2; GTPase)	J	Translation, ribosomal structure and biogenesis ;
PROKKA_00333	COG0532	Translation initiation factor 2 (IF-2; GTPase)	J	Translation, ribosomal structure and biogenesis ;
PROKKA_00336	COG0195	Transcription elongation factor	K	Transcription ;
PROKKA_00370	COG1744	Uncharacterized ABC-type transport system, periplasmic component/surface lipoprotein	R	General function prediction only ;
PROKKA_00371	COG1744	Uncharacterized ABC-type transport system, periplasmic component/surface lipoprotein	R	General function prediction only ;
PROKKA_00373	COG0353	Recombinational DNA repair protein (RecF pathway)	L	Replication, recombination and repair ;
PROKKA_00374	COG0353	Recombinational DNA repair protein (RecF pathway)	L	Replication, recombination and repair ;
PROKKA_00375	COG0718	Uncharacterized protein conserved in bacteria	S	Function unknown;
PROKKA_00377	COG2812	DNA polymerase III, gamma/tau subunits	L	Replication, recombination and repair ;
PROKKA_00380	COG2255	Holliday junction resolvasome, helicase subunit	L	Replication, recombination and repair ;
PROKKA_00384	COG0064	Asp-tRNAAsn/Glu-tRNAGln amidotransferase B subunit (PET112 homolog)	J	Translation, ribosomal structure and biogenesis ;
PROKKA_00385	COG0064	Asp-tRNAAsn/Glu-tRNAGln amidotransferase B subunit (PET112 homolog)	J	Translation, ribosomal structure and biogenesis ;
PROKKA_00386	COG0154	Asp-tRNAAsn/Glu-tRNAGln amidotransferase A subunit and related amidases	J	Translation, ribosomal structure and biogenesis ;
PROKKA_00388	COG0721	Asp-tRNAAsn/Glu-tRNAGln amidotransferase C subunit	J	Translation, ribosomal structure and biogenesis ;
PROKKA_00391	COG0692	Uracil DNA glycosylase	L	Replication, recombination and repair ;
PROKKA_00396	COG0305	Replicative DNA helicase	L	Replication, recombination and repair ;
PROKKA_00397	COG0359	Ribosomal protein L9	J	Translation, ribosomal structure and biogenesis ;
PROKKA_00398	COG0238	Ribosomal protein S18	J	Translation, ribosomal structure and biogenesis ;
PROKKA_00402	COG0360	Ribosomal protein S6	J	Translation, ribosomal structure and biogenesis ;
PROKKA_00403	COG2502	Asparagine synthetase A	E	Amino acid transport and metabolism ;
PROKKA_00404	COG2502	Asparagine synthetase A	E	Amino acid transport and metabolism ;
PROKKA_00405	COG2502	Asparagine synthetase A	E	Amino acid transport and metabolism ;
PROKKA_00406	COG1488	Nicotinic acid phosphoribosyltransferase	H	Coenzyme transport and metabolism ;
PROKKA_00407	COG1488	Nicotinic acid phosphoribosyltransferase	H	Coenzyme transport and metabolism ;
PROKKA_00411	COG0596	Predicted hydrolases or acyltransferases (alpha/beta hydrolase superfamily)	R	General function prediction only ;
PROKKA_00413	COG0561	Predicted hydrolases of the HAD superfamily	R	General function prediction only ;
PROKKA_00415	COG0280	Phosphotransacetylase	C	Energy production and conversion ;
PROKKA_00416	COG1161	Predicted GTPases	R	General function prediction only ;
PROKKA_00417	COG1284	Uncharacterized conserved protein	S	Function unknown;
PROKKA_00418	COG1284	Uncharacterized conserved protein	S	Function unknown;
PROKKA_00419	COG0335	Ribosomal protein L19	J	Translation, ribosomal structure and biogenesis ;
PROKKA_00420	COG0336	tRNA-(guanine-N1)-methyltransferase	J	Translation, ribosomal structure and biogenesis ;
PROKKA_00421	COG0228	Ribosomal protein S16	J	Translation, ribosomal structure and biogenesis ;
PROKKA_00422	COG0203	Ribosomal protein L17	J	Translation, ribosomal structure and biogenesis ;
PROKKA_00423	COG0202	DNA-directed RNA polymerase, alpha subunit/40 kD subunit	K	Transcription ;
PROKKA_00424	COG0202	DNA-directed RNA polymerase, alpha subunit/40 kD subunit	K	Transcription ;
PROKKA_00425	COG0100	Ribosomal protein S11	J	Translation, ribosomal structure and biogenesis ;
PROKKA_00427	COG0099	Ribosomal protein S13	J	Translation, ribosomal structure and biogenesis ;
PROKKA_00428	COG0361	Translation initiation factor 1 (IF-1)	J	Translation, ribosomal structure and biogenesis ;
PROKKA_00431	COG0550	Topoisomerase IA	L	Replication, recombination and repair ;
PROKKA_00432	COG0550	Topoisomerase IA	L	Replication, recombination and repair ;
PROKKA_00434	COG0550	Topoisomerase IA	L	Replication, recombination and repair ;
PROKKA_00435	COG0550	Topoisomerase IA	L	Replication, recombination and repair ;
PROKKA_00436	COG0036	Pentose-5-phosphate-3-epimerase	G	Carbohydrate transport and metabolism ;
PROKKA_00437	COG0166	Glucose-6-phosphate isomerase	G	Carbohydrate transport and metabolism ;
PROKKA_00439	COG1162	Predicted GTPases	R	General function prediction only ;
PROKKA_00440	COG0515	Serine/threonine protein kinase	L	Replication, recombination and repair ;
PROKKA_00441	COG0515	Serine/threonine protein kinase	L	Replication, recombination and repair ;
PROKKA_00442	COG0631	Serine/threonine protein phosphatase	T	Signal transduction mechanisms ;
PROKKA_00443	COG0631	Serine/threonine protein phosphatase	T	Signal transduction mechanisms ;
PROKKA_00444	COG0194	Guanylate kinase	F	Nucleotide transport and metabolism ;
PROKKA_00445	COG0242	N-formylmethionyl-tRNA deformylase	J	Translation, ribosomal structure and biogenesis ;
PROKKA_00450	COG0445	NAD/FAD-utilizing enzyme apparently involved in cell division	D	Cell cycle control, cell division, chromosome partitioning ;
PROKKA_00451	COG0445	NAD/FAD-utilizing enzyme apparently involved in cell division	D	Cell cycle control, cell division, chromosome partitioning ;
PROKKA_00452	COG0445	NAD/FAD-utilizing enzyme apparently involved in cell division	D	Cell cycle control, cell division, chromosome partitioning ;
PROKKA_00453	COG0357	Predicted S-adenosylmethionine-dependent methyltransferase involved in bacterial cell division	M	Cell wall/membrane/envelope biogenesis ;
PROKKA_00457	COG0250	Transcription antiterminator	K	Transcription ;
PROKKA_00471	COG0056	F0F1-type ATP synthase, alpha subunit	C	Energy production and conversion ;
PROKKA_00473	COG0055	F0F1-type ATP synthase, beta subunit	C	Energy production and conversion ;
PROKKA_00485	COG0191	Fructose/tagatose bisphosphate aldolase	G	Carbohydrate transport and metabolism ;
PROKKA_00486	COG0191	Fructose/tagatose bisphosphate aldolase	G	Carbohydrate transport and metabolism ;
PROKKA_00487	COG0191	Fructose/tagatose bisphosphate aldolase	G	Carbohydrate transport and metabolism ;
PROKKA_00488	COG0012	Predicted GTPase, probable translation factor	J	Translation, ribosomal structure and biogenesis ;
PROKKA_00489	COG1435	Thymidine kinase	F	Nucleotide transport and metabolism ;
PROKKA_00490	COG0080	Ribosomal protein L11	J	Translation, ribosomal structure and biogenesis ;
PROKKA_00491	COG0081	Ribosomal protein L1	J	Translation, ribosomal structure and biogenesis ;
PROKKA_00492	COG0081	Ribosomal protein L1	J	Translation, ribosomal structure and biogenesis ;
PROKKA_00493	COG0193	Peptidyl-tRNA hydrolase	J	Translation, ribosomal structure and biogenesis ;
PROKKA_00494	COG0037	Predicted ATPase of the PP-loop superfamily implicated in cell cycle control	D	Cell cycle control, cell division, chromosome partitioning ;
PROKKA_00495	COG1445	Phosphotransferase system fructose-specific component IIB	G	Carbohydrate transport and metabolism ;
PROKKA_00496	COG1299	Phosphotransferase system, fructose-specific IIC component	G	Carbohydrate transport and metabolism ;
PROKKA_00511	COG1518	Uncharacterized protein predicted to be involved in DNA repair	L	Replication, recombination and repair ;
PROKKA_00512	COG1518	Uncharacterized protein predicted to be involved in DNA repair	L	Replication, recombination and repair ;
PROKKA_00513	COG3512	Uncharacterized protein conserved in bacteria	S	Function unknown;
PROKKA_00516	COG0566	rRNA methylases	J	Translation, ribosomal structure and biogenesis ;
PROKKA_00517	COG0215	Cysteinyl-tRNA synthetase	J	Translation, ribosomal structure and biogenesis ;
PROKKA_00518	COG0215	Cysteinyl-tRNA synthetase	J	Translation, ribosomal structure and biogenesis ;
PROKKA_00524	COG0464	ATPases of the AAA+ class	O	Posttranslational modification, protein turnover, chaperones ;
PROKKA_00525	COG0286	Type I restriction-modification system methyltransferase subunit	V	Defense mechanisms ;
PROKKA_00526	COG0286	Type I restriction-modification system methyltransferase subunit	V	Defense mechanisms ;
PROKKA_00527	COG0286	Type I restriction-modification system methyltransferase subunit	V	Defense mechanisms ;
PROKKA_00533	COG0610	Type I site-specific restriction-modification system, R (restriction) subunit and related helicases	V	Defense mechanisms ;
PROKKA_00534	COG0610	Type I site-specific restriction-modification system, R (restriction) subunit and related helicases	V	Defense mechanisms ;
PROKKA_00535	COG0610	Type I site-specific restriction-modification system, R (restriction) subunit and related helicases	V	Defense mechanisms ;
PROKKA_00539	COG3328	Transposase and inactivated derivatives	L	Replication, recombination and repair ;
PROKKA_00540	COG3328	Transposase and inactivated derivatives	L	Replication, recombination and repair ;
PROKKA_00563	COG1012	NAD-dependent aldehyde dehydrogenases	C	Energy production and conversion ;
PROKKA_00564	COG1012	NAD-dependent aldehyde dehydrogenases	C	Energy production and conversion ;
PROKKA_00570	COG0055	F0F1-type ATP synthase, beta subunit	C	Energy production and conversion ;
PROKKA_00581	COG0272	NAD-dependent DNA ligase (contains BRCT domain type II)	L	Replication, recombination and repair ;
PROKKA_00582	COG0272	NAD-dependent DNA ligase (contains BRCT domain type II)	L	Replication, recombination and repair ;
PROKKA_00583	COG0272	NAD-dependent DNA ligase (contains BRCT domain type II)	L	Replication, recombination and repair ;
PROKKA_00585	COG0225	Peptide methionine sulfoxide reductase	O	Posttranslational modification, protein turnover, chaperones ;
PROKKA_00589	COG0553	Superfamily II DNA/RNA helicases, SNF2 family	L	Replication, recombination and repair ;
PROKKA_00590	COG0553	Superfamily II DNA/RNA helicases, SNF2 family	L	Replication, recombination and repair ;
PROKKA_00591	COG0553	Superfamily II DNA/RNA helicases, SNF2 family	L	Replication, recombination and repair ;
PROKKA_00606	COG0055	F0F1-type ATP synthase, beta subunit	C	Energy production and conversion ;
PROKKA_00607	COG0055	F0F1-type ATP synthase, beta subunit	C	Energy production and conversion ;
PROKKA_00621	COG1012	NAD-dependent aldehyde dehydrogenases	C	Energy production and conversion ;
PROKKA_00624	COG1078	HD superfamily phosphohydrolases	R	General function prediction only ;
PROKKA_00625	COG0008	Glutamyl- and glutaminyl-tRNA synthetases	J	Translation, ribosomal structure and biogenesis ;
PROKKA_00627	COG0008	Glutamyl- and glutaminyl-tRNA synthetases	J	Translation, ribosomal structure and biogenesis ;
PROKKA_00628	COG0008	Glutamyl- and glutaminyl-tRNA synthetases	J	Translation, ribosomal structure and biogenesis ;
PROKKA_00629	COG0190	5,10-methylene-tetrahydrofolate dehydrogenase/Methenyl tetrahydrofolate cyclohydrolase	H	Coenzyme transport and metabolism ;
PROKKA_00631	COG0682	Prolipoprotein diacylglyceryltransferase	M	Cell wall/membrane/envelope biogenesis ;
PROKKA_00633	COG0682	Prolipoprotein diacylglyceryltransferase	M	Cell wall/membrane/envelope biogenesis ;
PROKKA_00634	COG1493	Serine kinase of the HPr protein, regulates carbohydrate metabolism	T	Signal transduction mechanisms ;
PROKKA_00638	COG0084	Mg-dependent DNase	L	Replication, recombination and repair ;
PROKKA_00639	COG0486	Predicted GTPase	R	General function prediction only ;
PROKKA_00641	COG0125	Thymidylate kinase	F	Nucleotide transport and metabolism ;
PROKKA_00642	COG0172	Seryl-tRNA synthetase	J	Translation, ribosomal structure and biogenesis ;
PROKKA_00643	COG0188	Type IIA topoisomerase (DNA gyrase/topo II, topoisomerase IV), A subunit	L	Replication, recombination and repair ;
PROKKA_00644	COG0187	Type IIA topoisomerase (DNA gyrase/topo II, topoisomerase IV), B subunit	L	Replication, recombination and repair ;
PROKKA_00645	COG0187	Type IIA topoisomerase (DNA gyrase/topo II, topoisomerase IV), B subunit	L	Replication, recombination and repair ;
PROKKA_00646	COG0187	Type IIA topoisomerase (DNA gyrase/topo II, topoisomerase IV), B subunit	L	Replication, recombination and repair ;
PROKKA_00647	COG0187	Type IIA topoisomerase (DNA gyrase/topo II, topoisomerase IV), B subunit	L	Replication, recombination and repair ;
PROKKA_00648	COG0187	Type IIA topoisomerase (DNA gyrase/topo II, topoisomerase IV), B subunit	L	Replication, recombination and repair ;
PROKKA_00650	COG0484	DnaJ-class molecular chaperone with C-terminal Zn finger domain	O	Posttranslational modification, protein turnover, chaperones ;
PROKKA_00651	COG0592	DNA polymerase sliding clamp subunit (PCNA homolog)	L	Replication, recombination and repair ;
PROKKA_00653	COG1192	ATPases involved in chromosome partitioning	D	Cell cycle control, cell division, chromosome partitioning ;
PROKKA_00661	COG3328	Transposase and inactivated derivatives	L	Replication, recombination and repair ;
PROKKA_00671	COG3328	Transposase and inactivated derivatives	L	Replication, recombination and repair ;
PROKKA_00672	COG3328	Transposase and inactivated derivatives	L	Replication, recombination and repair ;
PROKKA_00679	COG1112	Superfamily I DNA and RNA helicases and helicase subunits	L	Replication, recombination and repair ;
PROKKA_00680	COG1112	Superfamily I DNA and RNA helicases and helicase subunits	L	Replication, recombination and repair ;
PROKKA_00685	COG2176	DNA polymerase III, alpha subunit (gram-positive type)	L	Replication, recombination and repair ;
PROKKA_00686	COG2176	DNA polymerase III, alpha subunit (gram-positive type)	L	Replication, recombination and repair ;
PROKKA_00688	COG2176	DNA polymerase III, alpha subunit (gram-positive type)	L	Replication, recombination and repair ;
PROKKA_00689	COG2176	DNA polymerase III, alpha subunit (gram-positive type)	L	Replication, recombination and repair ;
PROKKA_00690	COG2176	DNA polymerase III, alpha subunit (gram-positive type)	L	Replication, recombination and repair ;
PROKKA_00691	COG2176	DNA polymerase III, alpha subunit (gram-positive type)	L	Replication, recombination and repair ;
PROKKA_00695	COG0750	Predicted membrane-associated Zn-dependent proteases 1	M	Cell wall/membrane/envelope biogenesis ;
PROKKA_00696	COG0743	1-deoxy-D-xylulose 5-phosphate reductoisomerase	I	Lipid transport and metabolism ;
PROKKA_00697	COG0575	CDP-diglyceride synthetase	I	Lipid transport and metabolism ;
PROKKA_00699	COG0233	Ribosome recycling factor	J	Translation, ribosomal structure and biogenesis ;
PROKKA_00700	COG0528	Uridylate kinase	F	Nucleotide transport and metabolism ;
PROKKA_00701	COG0264	Translation elongation factor Ts	J	Translation, ribosomal structure and biogenesis ;
PROKKA_00702	COG0264	Translation elongation factor Ts	J	Translation, ribosomal structure and biogenesis ;
PROKKA_00703	COG0178	Excinuclease ATPase subunit	L	Replication, recombination and repair ;
PROKKA_00704	COG0178	Excinuclease ATPase subunit	L	Replication, recombination and repair ;
PROKKA_00705	COG0178	Excinuclease ATPase subunit	L	Replication, recombination and repair ;
PROKKA_00711	COG1674	DNA segregation ATPase FtsK/SpoIIIE and related proteins	D	Cell cycle control, cell division, chromosome partitioning ;
PROKKA_00714	COG0595	Predicted hydrolase of the metallo-beta-lactamase superfamily	R	General function prediction only ;
PROKKA_00715	COG0184	Ribosomal protein S15P/S13E	J	Translation, ribosomal structure and biogenesis ;
PROKKA_00717	COG1080	Phosphoenolpyruvate-protein kinase (PTS system EI component in bacteria)	G	Carbohydrate transport and metabolism ;
PROKKA_00718	COG1080	Phosphoenolpyruvate-protein kinase (PTS system EI component in bacteria)	G	Carbohydrate transport and metabolism ;
PROKKA_00719	COG1080	Phosphoenolpyruvate-protein kinase (PTS system EI component in bacteria)	G	Carbohydrate transport and metabolism ;
PROKKA_00725	COG0748	Putative heme iron utilization protein	P	Inorganic ion transport and metabolism ;
PROKKA_00726	COG0484	DnaJ-class molecular chaperone with C-terminal Zn finger domain	O	Posttranslational modification, protein turnover, chaperones ;
PROKKA_00727	COG1190	Lysyl-tRNA synthetase (class II)	J	Translation, ribosomal structure and biogenesis ;
PROKKA_00734	COG0039	Malate/lactate dehydrogenases	C	Energy production and conversion ;
PROKKA_00735	COG0039	Malate/lactate dehydrogenases	C	Energy production and conversion ;
PROKKA_00736	COG0024	Methionine aminopeptidase	J	Translation, ribosomal structure and biogenesis ;
PROKKA_00737	COG0024	Methionine aminopeptidase	J	Translation, ribosomal structure and biogenesis ;
PROKKA_00738	COG0563	Adenylate kinase and related kinases	F	Nucleotide transport and metabolism ;
PROKKA_00739	COG0563	Adenylate kinase and related kinases	F	Nucleotide transport and metabolism ;
PROKKA_00740	COG0201	Preprotein translocase subunit SecY	U	Intracellular trafficking, secretion, and vesicular transport ;
PROKKA_00741	COG0201	Preprotein translocase subunit SecY	U	Intracellular trafficking, secretion, and vesicular transport ;
PROKKA_00742	COG0200	Ribosomal protein L15	J	Translation, ribosomal structure and biogenesis ;
PROKKA_00743	COG0098	Ribosomal protein S5	J	Translation, ribosomal structure and biogenesis ;
PROKKA_00746	COG0097	Ribosomal protein L6P/L9E	J	Translation, ribosomal structure and biogenesis ;
PROKKA_00747	COG0097	Ribosomal protein L6P/L9E	J	Translation, ribosomal structure and biogenesis ;
PROKKA_00748	COG0096	Ribosomal protein S8	J	Translation, ribosomal structure and biogenesis ;
PROKKA_00749	COG0199	Ribosomal protein S14	J	Translation, ribosomal structure and biogenesis ;
PROKKA_00751	COG0094	Ribosomal protein L5	J	Translation, ribosomal structure and biogenesis ;
PROKKA_00752	COG0198	Ribosomal protein L24	J	Translation, ribosomal structure and biogenesis ;
PROKKA_00753	COG0093	Ribosomal protein L14	J	Translation, ribosomal structure and biogenesis ;
PROKKA_00754	COG0186	Ribosomal protein S17	J	Translation, ribosomal structure and biogenesis ;
PROKKA_00755	COG0255	Ribosomal protein L29	J	Translation, ribosomal structure and biogenesis ;
PROKKA_00757	COG0197	Ribosomal protein L16/L10E	J	Translation, ribosomal structure and biogenesis ;
PROKKA_00758	COG0092	Ribosomal protein S3	J	Translation, ribosomal structure and biogenesis ;
PROKKA_00759	COG0091	Ribosomal protein L22	J	Translation, ribosomal structure and biogenesis ;
PROKKA_00760	COG0185	Ribosomal protein S19	J	Translation, ribosomal structure and biogenesis ;
PROKKA_00761	COG0090	Ribosomal protein L2	J	Translation, ribosomal structure and biogenesis ;
PROKKA_00762	COG0089	Ribosomal protein L23	J	Translation, ribosomal structure and biogenesis ;
PROKKA_00763	COG0088	Ribosomal protein L4	J	Translation, ribosomal structure and biogenesis ;
PROKKA_00764	COG0087	Ribosomal protein L3	J	Translation, ribosomal structure and biogenesis ;
PROKKA_00765	COG0087	Ribosomal protein L3	J	Translation, ribosomal structure and biogenesis ;
PROKKA_00766	COG0051	Ribosomal protein S10	J	Translation, ribosomal structure and biogenesis ;
PROKKA_00772	COG2131	Deoxycytidylate deaminase	F	Nucleotide transport and metabolism ;
PROKKA_00774	COG0207	Thymidylate synthase	F	Nucleotide transport and metabolism ;
PROKKA_00775	COG0207	Thymidylate synthase	F	Nucleotide transport and metabolism ;
PROKKA_00777	COG0208	Ribonucleotide reductase, beta subunit	F	Nucleotide transport and metabolism ;
PROKKA_00778	COG0208	Ribonucleotide reductase, beta subunit	F	Nucleotide transport and metabolism ;
PROKKA_00779	COG1780	Protein involved in ribonucleotide reduction	F	Nucleotide transport and metabolism ;
PROKKA_00780	COG0209	Ribonucleotide reductase, alpha subunit	F	Nucleotide transport and metabolism ;
PROKKA_00781	COG0209	Ribonucleotide reductase, alpha subunit	F	Nucleotide transport and metabolism ;
PROKKA_00782	COG0704	Phosphate uptake regulator	P	Inorganic ion transport and metabolism ;
PROKKA_00784	COG1117	ABC-type phosphate transport system, ATPase component	P	Inorganic ion transport and metabolism ;
PROKKA_00785	COG1117	ABC-type phosphate transport system, ATPase component	P	Inorganic ion transport and metabolism ;
PROKKA_00786	COG0581	ABC-type phosphate transport system, permease component	P	Inorganic ion transport and metabolism ;
PROKKA_00787	COG0573	ABC-type phosphate transport system, permease component	P	Inorganic ion transport and metabolism ;
PROKKA_00789	COG0226	ABC-type phosphate transport system, periplasmic component	P	Inorganic ion transport and metabolism ;
PROKKA_00790	COG0226	ABC-type phosphate transport system, periplasmic component	P	Inorganic ion transport and metabolism ;
PROKKA_00791	COG0556	Helicase subunit of the DNA excision repair complex	L	Replication, recombination and repair ;
PROKKA_00792	COG0556	Helicase subunit of the DNA excision repair complex	L	Replication, recombination and repair ;
PROKKA_00794	COG0618	Exopolyphosphatase-related proteins	R	General function prediction only ;
PROKKA_00795	COG0618	Exopolyphosphatase-related proteins	R	General function prediction only ;
PROKKA_00797	COG0395	ABC-type sugar transport system, permease component	G	Carbohydrate transport and metabolism ;
PROKKA_00799	COG0395	ABC-type sugar transport system, permease component	G	Carbohydrate transport and metabolism ;
PROKKA_00800	COG1175	ABC-type sugar transport systems, permease components	G	Carbohydrate transport and metabolism ;
PROKKA_00802	COG1175	ABC-type sugar transport systems, permease components	G	Carbohydrate transport and metabolism ;
PROKKA_00803	COG3839	ABC-type sugar transport systems, ATPase components	G	Carbohydrate transport and metabolism ;
PROKKA_00804	COG3839	ABC-type sugar transport systems, ATPase components	G	Carbohydrate transport and metabolism ;
PROKKA_00812	COG0653	Preprotein translocase subunit SecA (ATPase, RNA helicase)	U	Intracellular trafficking, secretion, and vesicular transport ;
PROKKA_00813	COG0653	Preprotein translocase subunit SecA (ATPase, RNA helicase)	U	Intracellular trafficking, secretion, and vesicular transport ;
PROKKA_00814	COG0021	Transketolase	G	Carbohydrate transport and metabolism ;
PROKKA_00815	COG0021	Transketolase	G	Carbohydrate transport and metabolism ;
PROKKA_00816	COG1925	Phosphotransferase system, HPr-related proteins	G	Carbohydrate transport and metabolism ;
PROKKA_00819	COG0465	ATP-dependent Zn proteases	O	Posttranslational modification, protein turnover, chaperones ;
PROKKA_00820	COG0634	Hypoxanthine-guanine phosphoribosyltransferase	F	Nucleotide transport and metabolism ;
PROKKA_00821	COG0245	2C-methyl-D-erythritol 2,4-cyclodiphosphate synthase	I	Lipid transport and metabolism ;
PROKKA_00824	COG1136	ABC-type antimicrobial peptide transport system, ATPase component	V	Defense mechanisms ;
PROKKA_00831	COG0595	Predicted hydrolase of the metallo-beta-lactamase superfamily	R	General function prediction only ;
PROKKA_00833	COG0519	GMP synthase, PP-ATPase domain/subunit	F	Nucleotide transport and metabolism ;
PROKKA_00838	COG0579	Predicted dehydrogenase	R	General function prediction only ;
PROKKA_00839	COG0579	Predicted dehydrogenase	R	General function prediction only ;
PROKKA_00840	COG0554	Glycerol kinase	C	Energy production and conversion ;
PROKKA_00841	COG0554	Glycerol kinase	C	Energy production and conversion ;
PROKKA_00842	COG0554	Glycerol kinase	C	Energy production and conversion ;
PROKKA_00843	COG0580	Glycerol uptake facilitator and related permeases (Major Intrinsic Protein Family)	G	Carbohydrate transport and metabolism ;
PROKKA_00844	COG0580	Glycerol uptake facilitator and related permeases (Major Intrinsic Protein Family)	G	Carbohydrate transport and metabolism ;
PROKKA_00849	COG0018	Arginyl-tRNA synthetase	J	Translation, ribosomal structure and biogenesis ;
PROKKA_00852	COG0018	Arginyl-tRNA synthetase	J	Translation, ribosomal structure and biogenesis ;
PROKKA_00855	COG0030	Dimethyladenosine transferase (rRNA methylation)	J	Translation, ribosomal structure and biogenesis ;
PROKKA_00856	COG0030	Dimethyladenosine transferase (rRNA methylation)	J	Translation, ribosomal structure and biogenesis ;
PROKKA_00857	COG0706	Preprotein translocase subunit YidC	U	Intracellular trafficking, secretion, and vesicular transport ;
PROKKA_00859	COG0594	RNase P protein component	J	Translation, ribosomal structure and biogenesis ;
PROKKA_00860	COG0230	Ribosomal protein L34	J	Translation, ribosomal structure and biogenesis ;
PROKKA_00861	COG1132	ABC-type multidrug transport system, ATPase and permease components	V	Defense mechanisms ;
PROKKA_00862	COG1132	ABC-type multidrug transport system, ATPase and permease components	V	Defense mechanisms ;
PROKKA_00863	COG1132	ABC-type multidrug transport system, ATPase and permease components	V	Defense mechanisms ;
PROKKA_00866	COG1132	ABC-type multidrug transport system, ATPase and permease components	V	Defense mechanisms ;
PROKKA_00867	COG0593	ATPase involved in DNA replication initiation	L	Replication, recombination and repair ;
PROKKA_00869	COG3328	Transposase and inactivated derivatives	L	Replication, recombination and repair ;
PROKKA_00870	COG3328	Transposase and inactivated derivatives	L	Replication, recombination and repair ;
PROKKA_00885	COG0576	Molecular chaperone GrpE (heat shock protein)	O	Posttranslational modification, protein turnover, chaperones ;
PROKKA_00886	COG0484	DnaJ-class molecular chaperone with C-terminal Zn finger domain	O	Posttranslational modification, protein turnover, chaperones ;
PROKKA_00889	COG0484	DnaJ-class molecular chaperone with C-terminal Zn finger domain	O	Posttranslational modification, protein turnover, chaperones ;
PROKKA_00890	COG0596	Predicted hydrolases or acyltransferases (alpha/beta hydrolase superfamily)	R	General function prediction only ;
PROKKA_00897	COG0492	Thioredoxin reductase	O	Posttranslational modification, protein turnover, chaperones ;
PROKKA_00898	COG2235	Arginine deiminase	E	Amino acid transport and metabolism ;
PROKKA_00899	COG2235	Arginine deiminase	E	Amino acid transport and metabolism ;
PROKKA_00900	COG2235	Arginine deiminase	E	Amino acid transport and metabolism ;
PROKKA_00913	COG1196	Chromosome segregation ATPases	D	Cell cycle control, cell division, chromosome partitioning ;
PROKKA_00914	COG1196	Chromosome segregation ATPases	D	Cell cycle control, cell division, chromosome partitioning ;
PROKKA_00916	COG0716	Flavodoxins	C	Energy production and conversion ;
PROKKA_00918	COG0060	Isoleucyl-tRNA synthetase	J	Translation, ribosomal structure and biogenesis ;
PROKKA_00919	COG0060	Isoleucyl-tRNA synthetase	J	Translation, ribosomal structure and biogenesis ;
PROKKA_00920	COG0060	Isoleucyl-tRNA synthetase	J	Translation, ribosomal structure and biogenesis ;
PROKKA_00921	COG0060	Isoleucyl-tRNA synthetase	J	Translation, ribosomal structure and biogenesis ;
PROKKA_00922	COG0219	Predicted rRNA methylase (SpoU class)	J	Translation, ribosomal structure and biogenesis ;
PROKKA_00923	COG0220	Predicted S-adenosylmethionine-dependent methyltransferase	R	General function prediction only ;
PROKKA_00936	COG0126	3-phosphoglycerate kinase	G	Carbohydrate transport and metabolism ;
PROKKA_00937	COG0126	3-phosphoglycerate kinase	G	Carbohydrate transport and metabolism ;
PROKKA_00938	COG0126	3-phosphoglycerate kinase	G	Carbohydrate transport and metabolism ;
PROKKA_00939	COG0057	Glyceraldehyde-3-phosphate dehydrogenase/erythrose-4-phosphate dehydrogenase	G	Carbohydrate transport and metabolism ;
PROKKA_00940	COG0057	Glyceraldehyde-3-phosphate dehydrogenase/erythrose-4-phosphate dehydrogenase	G	Carbohydrate transport and metabolism ;
PROKKA_00941	COG1307	Uncharacterized protein conserved in bacteria	S	Function unknown;
PROKKA_00942	COG1307	Uncharacterized protein conserved in bacteria	S	Function unknown;
PROKKA_00949	COG0355	F0F1-type ATP synthase, epsilon subunit (mitochondrial delta subunit)	C	Energy production and conversion ;
PROKKA_00950	COG0055	F0F1-type ATP synthase, beta subunit	C	Energy production and conversion ;
PROKKA_00951	COG0224	F0F1-type ATP synthase, gamma subunit	C	Energy production and conversion ;
PROKKA_00952	COG0224	F0F1-type ATP synthase, gamma subunit	C	Energy production and conversion ;
PROKKA_00954	COG0056	F0F1-type ATP synthase, alpha subunit	C	Energy production and conversion ;
PROKKA_00955	COG0056	F0F1-type ATP synthase, alpha subunit	C	Energy production and conversion ;
PROKKA_00956	COG0712	F0F1-type ATP synthase, delta subunit (mitochondrial oligomycin sensitivity protein)	C	Energy production and conversion ;
PROKKA_00959	COG0636	F0F1-type ATP synthase, subunit c/Archaeal/vacuolar-type H+-ATPase, subunit K	C	Energy production and conversion ;
PROKKA_00961	COG0356	F0F1-type ATP synthase, subunit a	C	Energy production and conversion ;
PROKKA_00964	COG0035	Uracil phosphoribosyltransferase	F	Nucleotide transport and metabolism ;
PROKKA_00965	COG0821	Enzyme involved in the deoxyxylulose pathway of isoprenoid biosynthesis	I	Lipid transport and metabolism ;
PROKKA_00966	COG0103	Ribosomal protein S9	J	Translation, ribosomal structure and biogenesis ;
PROKKA_00967	COG0102	Ribosomal protein L13	J	Translation, ribosomal structure and biogenesis ;
PROKKA_00973	COG3328	Transposase and inactivated derivatives	L	Replication, recombination and repair ;
PROKKA_00974	COG3328	Transposase and inactivated derivatives	L	Replication, recombination and repair ;
PROKKA_00980	COG0112	Glycine/serine hydroxymethyltransferase	E	Amino acid transport and metabolism ;
PROKKA_00981	COG0162	Tyrosyl-tRNA synthetase	J	Translation, ribosomal structure and biogenesis ;
PROKKA_00982	COG0162	Tyrosyl-tRNA synthetase	J	Translation, ribosomal structure and biogenesis ;
PROKKA_00983	COG0541	Signal recognition particle GTPase	U	Intracellular trafficking, secretion, and vesicular transport ;
PROKKA_00984	COG0541	Signal recognition particle GTPase	U	Intracellular trafficking, secretion, and vesicular transport ;
PROKKA_00985	COG1764	Predicted redox protein, regulator of disulfide bond formation	O	Posttranslational modification, protein turnover, chaperones ;
PROKKA_00988	COG1131	ABC-type multidrug transport system, ATPase component	V	Defense mechanisms ;
PROKKA_00989	COG1131	ABC-type multidrug transport system, ATPase component	V	Defense mechanisms ;
PROKKA_00990	COG0484	DnaJ-class molecular chaperone with C-terminal Zn finger domain	O	Posttranslational modification, protein turnover, chaperones ;
PROKKA_00992	COG0240	Glycerol-3-phosphate dehydrogenase	C	Energy production and conversion ;
PROKKA_00993	COG0240	Glycerol-3-phosphate dehydrogenase	C	Energy production and conversion ;
PROKKA_00994	COG0484	DnaJ-class molecular chaperone with C-terminal Zn finger domain	O	Posttranslational modification, protein turnover, chaperones ;
PROKKA_00995	COG0719	ABC-type transport system involved in Fe-S cluster assembly, permease component	O	Posttranslational modification, protein turnover, chaperones ;
PROKKA_00996	COG0719	ABC-type transport system involved in Fe-S cluster assembly, permease component	O	Posttranslational modification, protein turnover, chaperones ;
PROKKA_00997	COG0719	ABC-type transport system involved in Fe-S cluster assembly, permease component	O	Posttranslational modification, protein turnover, chaperones ;
PROKKA_00998	COG0822	NifU homolog involved in Fe-S cluster formation	C	Energy production and conversion ;
PROKKA_01001	COG0719	ABC-type transport system involved in Fe-S cluster assembly, permease component	O	Posttranslational modification, protein turnover, chaperones ;
PROKKA_01002	COG0396	ABC-type transport system involved in Fe-S cluster assembly, ATPase component	O	Posttranslational modification, protein turnover, chaperones ;
PROKKA_01003	COG0396	ABC-type transport system involved in Fe-S cluster assembly, ATPase component	O	Posttranslational modification, protein turnover, chaperones ;
PROKKA_01006	COG0221	Inorganic pyrophosphatase	C	Energy production and conversion ;
PROKKA_01007	COG0221	Inorganic pyrophosphatase	C	Energy production and conversion ;
PROKKA_01016	COG0561	Predicted hydrolases of the HAD superfamily	R	General function prediction only ;
PROKKA_01025	COG0431	Predicted flavoprotein	R	General function prediction only ;
PROKKA_01034	COG0776	Bacterial nucleoid DNA-binding protein	L	Replication, recombination and repair ;
PROKKA_01035	COG0187	Type IIA topoisomerase (DNA gyrase/topo II, topoisomerase IV), B subunit	L	Replication, recombination and repair ;
PROKKA_01036	COG0187	Type IIA topoisomerase (DNA gyrase/topo II, topoisomerase IV), B subunit	L	Replication, recombination and repair ;
PROKKA_01037	COG0187	Type IIA topoisomerase (DNA gyrase/topo II, topoisomerase IV), B subunit	L	Replication, recombination and repair ;
PROKKA_01038	COG0188	Type IIA topoisomerase (DNA gyrase/topo II, topoisomerase IV), A subunit	L	Replication, recombination and repair ;
PROKKA_01039	COG1161	Predicted GTPases	R	General function prediction only ;
PROKKA_01040	COG1057	Nicotinic acid mononucleotide adenylyltransferase	H	Coenzyme transport and metabolism ;
PROKKA_01041	COG1713	Predicted HD superfamily hydrolase involved in NAD metabolism	H	Coenzyme transport and metabolism ;
PROKKA_01042	COG0775	Nucleoside phosphorylase	F	Nucleotide transport and metabolism ;
PROKKA_01050	COG1704	Uncharacterized conserved protein	S	Function unknown;
PROKKA_01055	COG1039	Ribonuclease HIII	L	Replication, recombination and repair ;
PROKKA_01059	COG0204	1-acyl-sn-glycerol-3-phosphate acyltransferase	I	Lipid transport and metabolism ;
PROKKA_01060	COG0262	Dihydrofolate reductase	H	Coenzyme transport and metabolism ;
PROKKA_01061	COG1354	Uncharacterized conserved protein	S	Function unknown;
PROKKA_01063	COG1386	Predicted transcriptional regulator containing the HTH domain	K	Transcription ;
PROKKA_01064	COG2001	Uncharacterized protein conserved in bacteria	S	Function unknown;
PROKKA_01065	COG0275	Predicted S-adenosylmethionine-dependent methyltransferase involved in cell envelope biogenesis	M	Cell wall/membrane/envelope biogenesis ;
PROKKA_01067	COG0206	Cell division GTPase	D	Cell cycle control, cell division, chromosome partitioning ;
PROKKA_01070	COG2274	ABC-type bacteriocin/lantibiotic exporters, contain an N-terminal double-glycine peptidase domain	V	Defense mechanisms ;
PROKKA_01071	COG2274	ABC-type bacteriocin/lantibiotic exporters, contain an N-terminal double-glycine peptidase domain	V	Defense mechanisms ;
PROKKA_01076	COG1159	GTPase	R	General function prediction only ;
PROKKA_01077	COG1381	Recombinational DNA repair protein (RecF pathway)	L	Replication, recombination and repair ;
PROKKA_01078	COG0423	Glycyl-tRNA synthetase (class II)	J	Translation, ribosomal structure and biogenesis ;
PROKKA_01079	COG0423	Glycyl-tRNA synthetase (class II)	J	Translation, ribosomal structure and biogenesis ;
PROKKA_01080	COG0423	Glycyl-tRNA synthetase (class II)	J	Translation, ribosomal structure and biogenesis ;
PROKKA_01081	COG0358	DNA primase (bacterial type)	L	Replication, recombination and repair ;
PROKKA_01083	COG0358	DNA primase (bacterial type)	L	Replication, recombination and repair ;
PROKKA_01084	COG0568	DNA-directed RNA polymerase, sigma subunit (sigma70/sigma32)	K	Transcription ;
PROKKA_01085	COG0568	DNA-directed RNA polymerase, sigma subunit (sigma70/sigma32)	K	Transcription ;
PROKKA_01086	COG0568	DNA-directed RNA polymerase, sigma subunit (sigma70/sigma32)	K	Transcription ;
PROKKA_01087	COG2384	Predicted SAM-dependent methyltransferase	R	General function prediction only ;
PROKKA_01088	COG0327	Uncharacterized conserved protein	S	Function unknown;
PROKKA_01090	COG0344	Predicted membrane protein	S	Function unknown;
PROKKA_01092	COG0694	Thioredoxin-like proteins and domains	O	Posttranslational modification, protein turnover, chaperones ;
PROKKA_01102	COG0210	Superfamily I DNA and RNA helicases	L	Replication, recombination and repair ;
PROKKA_01103	COG0210	Superfamily I DNA and RNA helicases	L	Replication, recombination and repair ;
PROKKA_01104	COG0210	Superfamily I DNA and RNA helicases	L	Replication, recombination and repair ;
PROKKA_01105	COG0212	5-formyltetrahydrofolate cyclo-ligase	H	Coenzyme transport and metabolism ;
PROKKA_01106	COG1692	Uncharacterized protein conserved in bacteria	S	Function unknown;
PROKKA_01107	COG1692	Uncharacterized protein conserved in bacteria	S	Function unknown;
PROKKA_01108	COG0427	Acetyl-CoA hydrolase	C	Energy production and conversion ;
PROKKA_01109	COG0427	Acetyl-CoA hydrolase	C	Energy production and conversion ;
PROKKA_01110	COG0427	Acetyl-CoA hydrolase	C	Energy production and conversion ;
PROKKA_01111	COG1131	ABC-type multidrug transport system, ATPase component	V	Defense mechanisms ;
PROKKA_01112	COG1131	ABC-type multidrug transport system, ATPase component	V	Defense mechanisms ;
PROKKA_01114	COG0466	ATP-dependent Lon protease, bacterial type	O	Posttranslational modification, protein turnover, chaperones ;
PROKKA_01115	COG0466	ATP-dependent Lon protease, bacterial type	O	Posttranslational modification, protein turnover, chaperones ;
PROKKA_01117	COG0466	ATP-dependent Lon protease, bacterial type	O	Posttranslational modification, protein turnover, chaperones ;
PROKKA_01118	COG0544	FKBP-type peptidyl-prolyl cis-trans isomerase (trigger factor)	O	Posttranslational modification, protein turnover, chaperones ;
PROKKA_01121	COG0735	Fe2+/Zn2+ uptake regulation proteins	P	Inorganic ion transport and metabolism ;
PROKKA_01122	COG0648	Endonuclease IV	L	Replication, recombination and repair ;
PROKKA_01123	COG0211	Ribosomal protein L27	J	Translation, ribosomal structure and biogenesis ;
PROKKA_01124	COG2868	Predicted ribosomal protein	J	Translation, ribosomal structure and biogenesis ;
PROKKA_01125	COG0261	Ribosomal protein L21	J	Translation, ribosomal structure and biogenesis ;
PROKKA_01126	COG1132	ABC-type multidrug transport system, ATPase and permease components	V	Defense mechanisms ;
PROKKA_01128	COG1132	ABC-type multidrug transport system, ATPase and permease components	V	Defense mechanisms ;
PROKKA_01129	COG1132	ABC-type multidrug transport system, ATPase and permease components	V	Defense mechanisms ;
PROKKA_01134	COG2213	Phosphotransferase system, mannitol-specific IIBC component	G	Carbohydrate transport and metabolism ;
PROKKA_01135	COG0072	Phenylalanyl-tRNA synthetase beta subunit	J	Translation, ribosomal structure and biogenesis ;
PROKKA_01136	COG0072	Phenylalanyl-tRNA synthetase beta subunit	J	Translation, ribosomal structure and biogenesis ;
PROKKA_01137	COG3382	Uncharacterized conserved protein	S	Function unknown;
PROKKA_01138	COG0073	EMAP domain	R	General function prediction only ;
PROKKA_01139	COG0016	Phenylalanyl-tRNA synthetase alpha subunit	J	Translation, ribosomal structure and biogenesis ;
PROKKA_01140	COG0016	Phenylalanyl-tRNA synthetase alpha subunit	J	Translation, ribosomal structure and biogenesis ;
PROKKA_01141	COG0292	Ribosomal protein L20	J	Translation, ribosomal structure and biogenesis ;
PROKKA_01142	COG0291	Ribosomal protein L35	J	Translation, ribosomal structure and biogenesis ;
PROKKA_01144	COG0290	Translation initiation factor 3 (IF-3)	J	Translation, ribosomal structure and biogenesis ;
PROKKA_01145	COG1739	Uncharacterized conserved protein	S	Function unknown;
PROKKA_01146	COG0322	Nuclease subunit of the excinuclease complex	L	Replication, recombination and repair ;
PROKKA_01147	COG1420	Transcriptional regulator of heat shock gene	K	Transcription ;
PROKKA_01148	COG1420	Transcriptional regulator of heat shock gene	K	Transcription ;
PROKKA_01150	COG1154	Deoxyxylulose-5-phosphate synthase	I	Lipid transport and metabolism ;
PROKKA_01153	COG1554	Trehalose and maltose hydrolases (possible phosphorylases)	G	Carbohydrate transport and metabolism ;
PROKKA_01159	COG1039	Ribonuclease HIII	L	Replication, recombination and repair ;
PROKKA_01172	COG0756	dUTPase	F	Nucleotide transport and metabolism ;
PROKKA_01173	COG1214	Inactive homolog of metal-dependent proteases, putative molecular chaperone	O	Posttranslational modification, protein turnover, chaperones ;
PROKKA_01174	COG0564	Pseudouridylate synthases, 23S RNA-specific	J	Translation, ribosomal structure and biogenesis ;
PROKKA_01176	COG0597	Lipoprotein signal peptidase	U	Intracellular trafficking, secretion, and vesicular transport ;
PROKKA_01178	COG0693	Putative intracellular protease/amidase	R	General function prediction only ;
PROKKA_01181	COG0596	Predicted hydrolases or acyltransferases (alpha/beta hydrolase superfamily)	R	General function prediction only ;
PROKKA_01183	COG0085	DNA-directed RNA polymerase, beta subunit/140 kD subunit	K	Transcription ;
PROKKA_01184	COG0085	DNA-directed RNA polymerase, beta subunit/140 kD subunit	K	Transcription ;
PROKKA_01185	COG0085	DNA-directed RNA polymerase, beta subunit/140 kD subunit	K	Transcription ;
PROKKA_01186	COG0085	DNA-directed RNA polymerase, beta subunit/140 kD subunit	K	Transcription ;
PROKKA_01188	COG0086	DNA-directed RNA polymerase, beta' subunit/160 kD subunit	K	Transcription ;
PROKKA_01189	COG0086	DNA-directed RNA polymerase, beta' subunit/160 kD subunit	K	Transcription ;
PROKKA_01190	COG0086	DNA-directed RNA polymerase, beta' subunit/160 kD subunit	K	Transcription ;
PROKKA_01208	COG3638	ABC-type phosphate/phosphonate transport system, ATPase component	P	Inorganic ion transport and metabolism ;
PROKKA_01212	COG0442	Prolyl-tRNA synthetase	J	Translation, ribosomal structure and biogenesis ;
PROKKA_01216	COG0236	Acyl carrier protein	Q	Secondary metabolites biosynthesis, transport and catabolism ;
PROKKA_01218	COG0050	GTPases - translation elongation factors	J	Translation, ribosomal structure and biogenesis ;
PROKKA_01219	COG0050	GTPases - translation elongation factors	J	Translation, ribosomal structure and biogenesis ;
PROKKA_01220	COG1307	Uncharacterized protein conserved in bacteria	S	Function unknown;
PROKKA_01223	COG0073	EMAP domain	R	General function prediction only ;
PROKKA_01235	COG0587	DNA polymerase III, alpha subunit	L	Replication, recombination and repair ;
PROKKA_01237	COG0587	DNA polymerase III, alpha subunit	L	Replication, recombination and repair ;
PROKKA_01238	COG0587	DNA polymerase III, alpha subunit	L	Replication, recombination and repair ;
PROKKA_01240	COG0258	5'-3' exonuclease (including N-terminal domain of PolI)	L	Replication, recombination and repair ;
PROKKA_01241	COG0266	Formamidopyrimidine-DNA glycosylase	L	Replication, recombination and repair ;
PROKKA_01242	COG0237	Dephospho-CoA kinase	H	Coenzyme transport and metabolism ;
PROKKA_01244	COG3611	Replication initiation/membrane attachment protein	L	Replication, recombination and repair ;
PROKKA_01248	COG0474	Cation transport ATPase	P	Inorganic ion transport and metabolism ;
PROKKA_01249	COG0474	Cation transport ATPase	P	Inorganic ion transport and metabolism ;
PROKKA_01250	COG0474	Cation transport ATPase	P	Inorganic ion transport and metabolism ;
PROKKA_01251	COG0474	Cation transport ATPase	P	Inorganic ion transport and metabolism ;
PROKKA_01252	COG0474	Cation transport ATPase	P	Inorganic ion transport and metabolism ;
PROKKA_01255	COG0017	Aspartyl/asparaginyl-tRNA synthetases	J	Translation, ribosomal structure and biogenesis ;
PROKKA_01257	COG0017	Aspartyl/asparaginyl-tRNA synthetases	J	Translation, ribosomal structure and biogenesis ;
PROKKA_01258	COG0558	Phosphatidylglycerophosphate synthase	I	Lipid transport and metabolism ;
PROKKA_01261	COG1211	4-diphosphocytidyl-2-methyl-D-erithritol synthase	I	Lipid transport and metabolism ;
PROKKA_01269	COG1116	ABC-type nitrate/sulfonate/bicarbonate transport system, ATPase component	P	Inorganic ion transport and metabolism ;
PROKKA_01270	COG3839	ABC-type sugar transport systems, ATPase components	G	Carbohydrate transport and metabolism ;
PROKKA_01272	COG0395	ABC-type sugar transport system, permease component	G	Carbohydrate transport and metabolism ;
PROKKA_01274	COG0264	Translation elongation factor Ts	J	Translation, ribosomal structure and biogenesis ;
PROKKA_01286	COG3328	Transposase and inactivated derivatives	L	Replication, recombination and repair ;
PROKKA_01287	COG3328	Transposase and inactivated derivatives	L	Replication, recombination and repair ;
PROKKA_01298	COG0531	Amino acid transporters	E	Amino acid transport and metabolism ;
PROKKA_01305	COG0782	Transcription elongation factor	K	Transcription ;
PROKKA_01309	COG0503	Adenine/guanine phosphoribosyltransferases and related PRPP-binding proteins	F	Nucleotide transport and metabolism ;
PROKKA_01314	COG0504	CTP synthase (UTP-ammonia lyase)	F	Nucleotide transport and metabolism ;
PROKKA_01315	COG0504	CTP synthase (UTP-ammonia lyase)	F	Nucleotide transport and metabolism ;
PROKKA_01317	COG0317	Guanosine polyphosphate pyrophosphohydrolases/synthetases	K	Transcription ;
PROKKA_01318	COG0317	Guanosine polyphosphate pyrophosphohydrolases/synthetases	K	Transcription ;
PROKKA_01320	COG0173	Aspartyl-tRNA synthetase	J	Translation, ribosomal structure and biogenesis ;
PROKKA_01321	COG0173	Aspartyl-tRNA synthetase	J	Translation, ribosomal structure and biogenesis ;
PROKKA_01323	COG0124	Histidyl-tRNA synthetase	J	Translation, ribosomal structure and biogenesis ;
PROKKA_01324	COG0124	Histidyl-tRNA synthetase	J	Translation, ribosomal structure and biogenesis ;
PROKKA_01325	COG0124	Histidyl-tRNA synthetase	J	Translation, ribosomal structure and biogenesis ;
PROKKA_01354	COG0441	Threonyl-tRNA synthetase	J	Translation, ribosomal structure and biogenesis ;
PROKKA_01355	COG0441	Threonyl-tRNA synthetase	J	Translation, ribosomal structure and biogenesis ;
PROKKA_01356	COG0441	Threonyl-tRNA synthetase	J	Translation, ribosomal structure and biogenesis ;
PROKKA_01360	COG0552	Signal recognition particle GTPase	U	Intracellular trafficking, secretion, and vesicular transport ;
PROKKA_01361	COG0552	Signal recognition particle GTPase	U	Intracellular trafficking, secretion, and vesicular transport ;
PROKKA_01362	COG1196	Chromosome segregation ATPases	D	Cell cycle control, cell division, chromosome partitioning ;
PROKKA_01363	COG1196	Chromosome segregation ATPases	D	Cell cycle control, cell division, chromosome partitioning ;
PROKKA_01364	COG1196	Chromosome segregation ATPases	D	Cell cycle control, cell division, chromosome partitioning ;
PROKKA_01365	COG1196	Chromosome segregation ATPases	D	Cell cycle control, cell division, chromosome partitioning ;
PROKKA_01367	COG0635	Coproporphyrinogen III oxidase and related Fe-S oxidoreductases	H	Coenzyme transport and metabolism ;
PROKKA_01368	COG0324	tRNA delta(2)-isopentenylpyrophosphate transferase	J	Translation, ribosomal structure and biogenesis ;
PROKKA_01369	COG0324	tRNA delta(2)-isopentenylpyrophosphate transferase	J	Translation, ribosomal structure and biogenesis ;
PROKKA_01374	COG3328	Transposase and inactivated derivatives	L	Replication, recombination and repair ;
PROKKA_01375	COG3328	Transposase and inactivated derivatives	L	Replication, recombination and repair ;
PROKKA_01395	COG0693	Putative intracellular protease/amidase	R	General function prediction only ;
PROKKA_01397	COG0283	Cytidylate kinase	F	Nucleotide transport and metabolism ;
PROKKA_01398	COG0283	Cytidylate kinase	F	Nucleotide transport and metabolism ;
PROKKA_01399	COG1160	Predicted GTPases	R	General function prediction only ;
PROKKA_01400	COG1160	Predicted GTPases	R	General function prediction only ;
PROKKA_01401	COG1160	Predicted GTPases	R	General function prediction only ;
PROKKA_01402	COG0143	Methionyl-tRNA synthetase	J	Translation, ribosomal structure and biogenesis ;
PROKKA_01403	COG0143	Methionyl-tRNA synthetase	J	Translation, ribosomal structure and biogenesis ;
PROKKA_01404	COG0143	Methionyl-tRNA synthetase	J	Translation, ribosomal structure and biogenesis ;
PROKKA_01413	COG0484	DnaJ-class molecular chaperone with C-terminal Zn finger domain	O	Posttranslational modification, protein turnover, chaperones ;
PROKKA_01414	COG0484	DnaJ-class molecular chaperone with C-terminal Zn finger domain	O	Posttranslational modification, protein turnover, chaperones ;
PROKKA_01415	COG0143	Methionyl-tRNA synthetase	J	Translation, ribosomal structure and biogenesis ;
PROKKA_01416	COG0143	Methionyl-tRNA synthetase	J	Translation, ribosomal structure and biogenesis ;
PROKKA_01423	COG0484	DnaJ-class molecular chaperone with C-terminal Zn finger domain	O	Posttranslational modification, protein turnover, chaperones ;
PROKKA_01425	COG0333	Ribosomal protein L32	J	Translation, ribosomal structure and biogenesis ;
PROKKA_01426	COG0222	Ribosomal protein L7/L12	J	Translation, ribosomal structure and biogenesis ;
PROKKA_01427	COG0244	Ribosomal protein L10	J	Translation, ribosomal structure and biogenesis ;
PROKKA_01430	COG0776	Bacterial nucleoid DNA-binding protein	L	Replication, recombination and repair ;
PROKKA_01432	COG3331	Penicillin-binding protein-related factor A, putative recombinase	R	General function prediction only ;
PROKKA_01434	COG0698	Ribose 5-phosphate isomerase RpiB	G	Carbohydrate transport and metabolism ;
PROKKA_01435	COG0009	Putative translation factor (SUA5)	J	Translation, ribosomal structure and biogenesis ;
PROKKA_01436	COG2890	Methylase of polypeptide chain release factors	J	Translation, ribosomal structure and biogenesis ;
PROKKA_01438	COG0216	Protein chain release factor A	J	Translation, ribosomal structure and biogenesis ;
PROKKA_01439	COG0216	Protein chain release factor A	J	Translation, ribosomal structure and biogenesis ;
PROKKA_01440	COG0254	Ribosomal protein L31	J	Translation, ribosomal structure and biogenesis ;
PROKKA_01442	COG1012	NAD-dependent aldehyde dehydrogenases	C	Energy production and conversion ;
PROKKA_01443	COG1012	NAD-dependent aldehyde dehydrogenases	C	Energy production and conversion ;
PROKKA_01445	COG1012	NAD-dependent aldehyde dehydrogenases	C	Energy production and conversion ;
PROKKA_01446	COG2190	Phosphotransferase system IIA components	G	Carbohydrate transport and metabolism ;
PROKKA_01447	COG1263	Phosphotransferase system IIC components, glucose/maltose/N-acetylglucosamine-specific	G	Carbohydrate transport and metabolism ;
PROKKA_01449	COG1263	Phosphotransferase system IIC components, glucose/maltose/N-acetylglucosamine-specific	G	Carbohydrate transport and metabolism ;
PROKKA_01456	COG0217	Uncharacterized conserved protein	S	Function unknown;
PROKKA_01459	COG2731	Beta-galactosidase, beta subunit	G	Carbohydrate transport and metabolism ;
PROKKA_01463	COG0223	Methionyl-tRNA formyltransferase	J	Translation, ribosomal structure and biogenesis ;
PROKKA_01468	COG0826	Collagenase and related proteases	O	Posttranslational modification, protein turnover, chaperones ;
PROKKA_01469	COG0826	Collagenase and related proteases	O	Posttranslational modification, protein turnover, chaperones ;
PROKKA_01470	COG0826	Collagenase and related proteases	O	Posttranslational modification, protein turnover, chaperones ;
PROKKA_01472	COG0826	Collagenase and related proteases	O	Posttranslational modification, protein turnover, chaperones ;
PROKKA_01473	COG4122	Predicted O-methyltransferase	R	General function prediction only ;
PROKKA_01474	COG0816	Predicted endonuclease involved in recombination (possible Holliday junction resolvase in Mycoplasmas and B. subtilis)	L	Replication, recombination and repair ;
PROKKA_01475	COG0013	Alanyl-tRNA synthetase	J	Translation, ribosomal structure and biogenesis ;
PROKKA_01476	COG0013	Alanyl-tRNA synthetase	J	Translation, ribosomal structure and biogenesis ;
PROKKA_01477	COG0013	Alanyl-tRNA synthetase	J	Translation, ribosomal structure and biogenesis ;
PROKKA_01478	COG0013	Alanyl-tRNA synthetase	J	Translation, ribosomal structure and biogenesis ;
PROKKA_01479	COG0013	Alanyl-tRNA synthetase	J	Translation, ribosomal structure and biogenesis ;
PROKKA_01480	COG0427	Acetyl-CoA hydrolase	C	Energy production and conversion ;
PROKKA_01481	COG0482	Predicted tRNA(5-methylaminomethyl-2-thiouridylate) methyltransferase, contains the PP-loop ATPase domain	J	Translation, ribosomal structure and biogenesis ;
PROKKA_01482	COG0196	FAD synthase	H	Coenzyme transport and metabolism ;
PROKKA_01483	COG0130	Pseudouridine synthase	J	Translation, ribosomal structure and biogenesis ;
PROKKA_01495	COG3845	ABC-type uncharacterized transport systems, ATPase components	R	General function prediction only ;
PROKKA_01496	COG3845	ABC-type uncharacterized transport systems, ATPase components	R	General function prediction only ;
PROKKA_01497	COG4603	ABC-type uncharacterized transport system, permease component	R	General function prediction only ;
PROKKA_01498	COG4603	ABC-type uncharacterized transport system, permease component	R	General function prediction only ;
PROKKA_01501	COG1079	Uncharacterized ABC-type transport system, permease component	R	General function prediction only ;
PROKKA_01504	COG0813	Purine-nucleoside phosphorylase	F	Nucleotide transport and metabolism ;
PROKKA_01505	COG0813	Purine-nucleoside phosphorylase	F	Nucleotide transport and metabolism ;
PROKKA_01506	COG0274	Deoxyribose-phosphate aldolase	F	Nucleotide transport and metabolism ;
PROKKA_01507	COG0213	Thymidine phosphorylase	F	Nucleotide transport and metabolism ;
PROKKA_01508	COG0213	Thymidine phosphorylase	F	Nucleotide transport and metabolism ;
PROKKA_01509	COG0213	Thymidine phosphorylase	F	Nucleotide transport and metabolism ;
PROKKA_01510	COG0295	Cytidine deaminase	F	Nucleotide transport and metabolism ;
PROKKA_01511	COG1109	Phosphomannomutase	G	Carbohydrate transport and metabolism ;
PROKKA_01512	COG1109	Phosphomannomutase	G	Carbohydrate transport and metabolism ;
PROKKA_01514	COG0149	Triosephosphate isomerase	G	Carbohydrate transport and metabolism ;
PROKKA_01515	COG0696	Phosphoglyceromutase	G	Carbohydrate transport and metabolism ;
PROKKA_01516	COG1122	ABC-type cobalt transport system, ATPase component	P	Inorganic ion transport and metabolism ;
PROKKA_01517	COG1122	ABC-type cobalt transport system, ATPase component	P	Inorganic ion transport and metabolism ;
PROKKA_01520	COG0619	ABC-type cobalt transport system, permease component CbiQ and related transporters	P	Inorganic ion transport and metabolism ;
PROKKA_01521	COG0101	Pseudouridylate synthase	J	Translation, ribosomal structure and biogenesis ;
PROKKA_01522	COG0101	Pseudouridylate synthase	J	Translation, ribosomal structure and biogenesis ;
PROKKA_01523	COG0462	Phosphoribosylpyrophosphate synthetase	E	Amino acid transport and metabolism ;
PROKKA_01524	COG1658	Small primase-like proteins (Toprim domain)	L	Replication, recombination and repair ;
PROKKA_01527	COG0389	Nucleotidyltransferase/DNA polymerase involved in DNA repair	L	Replication, recombination and repair ;
PROKKA_01528	COG0463	Glycosyltransferases involved in cell wall biogenesis	M	Cell wall/membrane/envelope biogenesis ;
PROKKA_01530	COG0021	Transketolase	G	Carbohydrate transport and metabolism ;
PROKKA_01533	COG3763	Uncharacterized protein conserved in bacteria	S	Function unknown;
PROKKA_01534	COG0218	Predicted GTPase	R	General function prediction only ;
PROKKA_01535	COG0525	Valyl-tRNA synthetase	J	Translation, ribosomal structure and biogenesis ;
PROKKA_01536	COG0525	Valyl-tRNA synthetase	J	Translation, ribosomal structure and biogenesis ;
PROKKA_01537	COG0525	Valyl-tRNA synthetase	J	Translation, ribosomal structure and biogenesis ;
PROKKA_01538	COG0525	Valyl-tRNA synthetase	J	Translation, ribosomal structure and biogenesis ;
PROKKA_01539	COG0525	Valyl-tRNA synthetase	J	Translation, ribosomal structure and biogenesis ;
PROKKA_01541	COG0525	Valyl-tRNA synthetase	J	Translation, ribosomal structure and biogenesis ;
