# Supplementary material for: Drug sensitivity and genome-wide analysis of two strains of Mycoplasma gallisepticum with different biofilm intensity
Source: Front Microbiol. 2023 Aug 9;14:1196747. doi: 10.3389/fmicb.2023.1196747 (PMC10445764; doi:10.3389/fmicb.2023.1196747)
Supplement: Supplementary file 4 [file Table_4.XLS]

Gene_ID	COG_ID	COG_name	Code	Name
PROKKA_00001	COG3328	Transposase and inactivated derivatives	L	Replication, recombination and repair ;
PROKKA_00010	COG0566	rRNA methylases	J	Translation, ribosomal structure and biogenesis ;
PROKKA_00011	COG1012	NAD-dependent aldehyde dehydrogenases	C	Energy production and conversion ;
PROKKA_00012	COG1012	NAD-dependent aldehyde dehydrogenases	C	Energy production and conversion ;
PROKKA_00013	COG1012	NAD-dependent aldehyde dehydrogenases	C	Energy production and conversion ;
PROKKA_00018	COG0055	F0F1-type ATP synthase, beta subunit	C	Energy production and conversion ;
PROKKA_00025	COG0272	NAD-dependent DNA ligase (contains BRCT domain type II)	L	Replication, recombination and repair ;
PROKKA_00027	COG0225	Peptide methionine sulfoxide reductase	O	Posttranslational modification, protein turnover, chaperones ;
PROKKA_00028	COG0553	Superfamily II DNA/RNA helicases, SNF2 family	L	Replication, recombination and repair ;
PROKKA_00030	COG0810	Periplasmic protein TonB, links inner and outer membranes	M	Cell wall/membrane/envelope biogenesis ;
PROKKA_00037	COG0055	F0F1-type ATP synthase, beta subunit	C	Energy production and conversion ;
PROKKA_00038	COG0055	F0F1-type ATP synthase, beta subunit	C	Energy production and conversion ;
PROKKA_00041	COG0810	Periplasmic protein TonB, links inner and outer membranes	M	Cell wall/membrane/envelope biogenesis ;
PROKKA_00042	COG0810	Periplasmic protein TonB, links inner and outer membranes	M	Cell wall/membrane/envelope biogenesis ;
PROKKA_00043	COG1012	NAD-dependent aldehyde dehydrogenases	C	Energy production and conversion ;
PROKKA_00044	COG1078	HD superfamily phosphohydrolases	R	General function prediction only ;
PROKKA_00045	COG0008	Glutamyl- and glutaminyl-tRNA synthetases	J	Translation, ribosomal structure and biogenesis ;
PROKKA_00046	COG0190	5,10-methylene-tetrahydrofolate dehydrogenase/Methenyl tetrahydrofolate cyclohydrolase	H	Coenzyme transport and metabolism ;
PROKKA_00047	COG0682	Prolipoprotein diacylglyceryltransferase	M	Cell wall/membrane/envelope biogenesis ;
PROKKA_00048	COG1493	Serine kinase of the HPr protein, regulates carbohydrate metabolism	T	Signal transduction mechanisms ;
PROKKA_00051	COG0084	Mg-dependent DNase	L	Replication, recombination and repair ;
PROKKA_00052	COG0486	Predicted GTPase	R	General function prediction only ;
PROKKA_00053	COG2812	DNA polymerase III, gamma/tau subunits	L	Replication, recombination and repair ;
PROKKA_00054	COG0125	Thymidylate kinase	F	Nucleotide transport and metabolism ;
PROKKA_00055	COG0172	Seryl-tRNA synthetase	J	Translation, ribosomal structure and biogenesis ;
PROKKA_00056	COG0188	Type IIA topoisomerase (DNA gyrase/topo II, topoisomerase IV), A subunit	L	Replication, recombination and repair ;
PROKKA_00057	COG0187	Type IIA topoisomerase (DNA gyrase/topo II, topoisomerase IV), B subunit	L	Replication, recombination and repair ;
PROKKA_00058	COG0484	DnaJ-class molecular chaperone with C-terminal Zn finger domain	O	Posttranslational modification, protein turnover, chaperones ;
PROKKA_00059	COG0592	DNA polymerase sliding clamp subunit (PCNA homolog)	L	Replication, recombination and repair ;
PROKKA_00060	COG1192	ATPases involved in chromosome partitioning	D	Cell cycle control, cell division, chromosome partitioning ;
PROKKA_00062	COG0593	ATPase involved in DNA replication initiation	L	Replication, recombination and repair ;
PROKKA_00063	COG1132	ABC-type multidrug transport system, ATPase and permease components	V	Defense mechanisms ;
PROKKA_00064	COG1132	ABC-type multidrug transport system, ATPase and permease components	V	Defense mechanisms ;
PROKKA_00065	COG1132	ABC-type multidrug transport system, ATPase and permease components	V	Defense mechanisms ;
PROKKA_00066	COG1132	ABC-type multidrug transport system, ATPase and permease components	V	Defense mechanisms ;
PROKKA_00067	COG0230	Ribosomal protein L34	J	Translation, ribosomal structure and biogenesis ;
PROKKA_00068	COG0594	RNase P protein component	J	Translation, ribosomal structure and biogenesis ;
PROKKA_00069	COG0706	Preprotein translocase subunit YidC	U	Intracellular trafficking, secretion, and vesicular transport ;
PROKKA_00070	COG0030	Dimethyladenosine transferase (rRNA methylation)	J	Translation, ribosomal structure and biogenesis ;
PROKKA_00071	COG1947	4-diphosphocytidyl-2C-methyl-D-erythritol 2-phosphate synthase	I	Lipid transport and metabolism ;
PROKKA_00072	COG0018	Arginyl-tRNA synthetase	J	Translation, ribosomal structure and biogenesis ;
PROKKA_00073	COG2374	Predicted extracellular nuclease	R	General function prediction only ;
PROKKA_00074	COG0580	Glycerol uptake facilitator and related permeases (Major Intrinsic Protein Family)	G	Carbohydrate transport and metabolism ;
PROKKA_00075	COG0554	Glycerol kinase	C	Energy production and conversion ;
PROKKA_00076	COG0579	Predicted dehydrogenase	R	General function prediction only ;
PROKKA_00079	COG1528	Ferritin-like protein	P	Inorganic ion transport and metabolism ;
PROKKA_00080	COG0519	GMP synthase, PP-ATPase domain/subunit	F	Nucleotide transport and metabolism ;
PROKKA_00081	COG0595	Predicted hydrolase of the metallo-beta-lactamase superfamily	R	General function prediction only ;
PROKKA_00083	COG1136	ABC-type antimicrobial peptide transport system, ATPase component	V	Defense mechanisms ;
PROKKA_00086	COG0245	2C-methyl-D-erythritol 2,4-cyclodiphosphate synthase	I	Lipid transport and metabolism ;
PROKKA_00087	COG0634	Hypoxanthine-guanine phosphoribosyltransferase	F	Nucleotide transport and metabolism ;
PROKKA_00088	COG0465	ATP-dependent Zn proteases	O	Posttranslational modification, protein turnover, chaperones ;
PROKKA_00091	COG1925	Phosphotransferase system, HPr-related proteins	G	Carbohydrate transport and metabolism ;
PROKKA_00092	COG0021	Transketolase	G	Carbohydrate transport and metabolism ;
PROKKA_00093	COG0653	Preprotein translocase subunit SecA (ATPase, RNA helicase)	U	Intracellular trafficking, secretion, and vesicular transport ;
PROKKA_00095	COG1525	Micrococcal nuclease (thermonuclease) homologs	L	Replication, recombination and repair ;
PROKKA_00096	COG3839	ABC-type sugar transport systems, ATPase components	G	Carbohydrate transport and metabolism ;
PROKKA_00097	COG1175	ABC-type sugar transport systems, permease components	G	Carbohydrate transport and metabolism ;
PROKKA_00098	COG0395	ABC-type sugar transport system, permease component	G	Carbohydrate transport and metabolism ;
PROKKA_00100	COG0618	Exopolyphosphatase-related proteins	R	General function prediction only ;
PROKKA_00101	COG0556	Helicase subunit of the DNA excision repair complex	L	Replication, recombination and repair ;
PROKKA_00102	COG0226	ABC-type phosphate transport system, periplasmic component	P	Inorganic ion transport and metabolism ;
PROKKA_00103	COG0573	ABC-type phosphate transport system, permease component	P	Inorganic ion transport and metabolism ;
PROKKA_00104	COG1117	ABC-type phosphate transport system, ATPase component	P	Inorganic ion transport and metabolism ;
PROKKA_00105	COG0704	Phosphate uptake regulator	P	Inorganic ion transport and metabolism ;
PROKKA_00106	COG0209	Ribonucleotide reductase, alpha subunit	F	Nucleotide transport and metabolism ;
PROKKA_00107	COG1780	Protein involved in ribonucleotide reduction	F	Nucleotide transport and metabolism ;
PROKKA_00108	COG0208	Ribonucleotide reductase, beta subunit	F	Nucleotide transport and metabolism ;
PROKKA_00109	COG0207	Thymidylate synthase	F	Nucleotide transport and metabolism ;
PROKKA_00110	COG2131	Deoxycytidylate deaminase	F	Nucleotide transport and metabolism ;
PROKKA_00113	COG0051	Ribosomal protein S10	J	Translation, ribosomal structure and biogenesis ;
PROKKA_00114	COG0087	Ribosomal protein L3	J	Translation, ribosomal structure and biogenesis ;
PROKKA_00115	COG0088	Ribosomal protein L4	J	Translation, ribosomal structure and biogenesis ;
PROKKA_00116	COG0089	Ribosomal protein L23	J	Translation, ribosomal structure and biogenesis ;
PROKKA_00117	COG0090	Ribosomal protein L2	J	Translation, ribosomal structure and biogenesis ;
PROKKA_00118	COG0185	Ribosomal protein S19	J	Translation, ribosomal structure and biogenesis ;
PROKKA_00119	COG0091	Ribosomal protein L22	J	Translation, ribosomal structure and biogenesis ;
PROKKA_00120	COG0092	Ribosomal protein S3	J	Translation, ribosomal structure and biogenesis ;
PROKKA_00121	COG0197	Ribosomal protein L16/L10E	J	Translation, ribosomal structure and biogenesis ;
PROKKA_00122	COG0255	Ribosomal protein L29	J	Translation, ribosomal structure and biogenesis ;
PROKKA_00123	COG0186	Ribosomal protein S17	J	Translation, ribosomal structure and biogenesis ;
PROKKA_00124	COG0093	Ribosomal protein L14	J	Translation, ribosomal structure and biogenesis ;
PROKKA_00125	COG0198	Ribosomal protein L24	J	Translation, ribosomal structure and biogenesis ;
PROKKA_00126	COG0094	Ribosomal protein L5	J	Translation, ribosomal structure and biogenesis ;
PROKKA_00127	COG0199	Ribosomal protein S14	J	Translation, ribosomal structure and biogenesis ;
PROKKA_00128	COG0096	Ribosomal protein S8	J	Translation, ribosomal structure and biogenesis ;
PROKKA_00129	COG0097	Ribosomal protein L6P/L9E	J	Translation, ribosomal structure and biogenesis ;
PROKKA_00130	COG0256	Ribosomal protein L18	J	Translation, ribosomal structure and biogenesis ;
PROKKA_00131	COG0098	Ribosomal protein S5	J	Translation, ribosomal structure and biogenesis ;
PROKKA_00132	COG0200	Ribosomal protein L15	J	Translation, ribosomal structure and biogenesis ;
PROKKA_00133	COG0201	Preprotein translocase subunit SecY	U	Intracellular trafficking, secretion, and vesicular transport ;
PROKKA_00134	COG0563	Adenylate kinase and related kinases	F	Nucleotide transport and metabolism ;
PROKKA_00135	COG0024	Methionine aminopeptidase	J	Translation, ribosomal structure and biogenesis ;
PROKKA_00136	COG0039	Malate/lactate dehydrogenases	C	Energy production and conversion ;
PROKKA_00139	COG1112	Superfamily I DNA and RNA helicases and helicase subunits	L	Replication, recombination and repair ;
PROKKA_00140	COG2176	DNA polymerase III, alpha subunit (gram-positive type)	L	Replication, recombination and repair ;
PROKKA_00141	COG0750	Predicted membrane-associated Zn-dependent proteases 1	M	Cell wall/membrane/envelope biogenesis ;
PROKKA_00142	COG0743	1-deoxy-D-xylulose 5-phosphate reductoisomerase	I	Lipid transport and metabolism ;
PROKKA_00143	COG0575	CDP-diglyceride synthetase	I	Lipid transport and metabolism ;
PROKKA_00144	COG0233	Ribosome recycling factor	J	Translation, ribosomal structure and biogenesis ;
PROKKA_00145	COG0528	Uridylate kinase	F	Nucleotide transport and metabolism ;
PROKKA_00146	COG0264	Translation elongation factor Ts	J	Translation, ribosomal structure and biogenesis ;
PROKKA_00147	COG0178	Excinuclease ATPase subunit	L	Replication, recombination and repair ;
PROKKA_00149	COG3118	Thioredoxin domain-containing protein	O	Posttranslational modification, protein turnover, chaperones ;
PROKKA_00150	COG1674	DNA segregation ATPase FtsK/SpoIIIE and related proteins	D	Cell cycle control, cell division, chromosome partitioning ;
PROKKA_00151	COG0595	Predicted hydrolase of the metallo-beta-lactamase superfamily	R	General function prediction only ;
PROKKA_00152	COG0184	Ribosomal protein S15P/S13E	J	Translation, ribosomal structure and biogenesis ;
PROKKA_00155	COG1080	Phosphoenolpyruvate-protein kinase (PTS system EI component in bacteria)	G	Carbohydrate transport and metabolism ;
PROKKA_00158	COG0748	Putative heme iron utilization protein	P	Inorganic ion transport and metabolism ;
PROKKA_00159	COG0484	DnaJ-class molecular chaperone with C-terminal Zn finger domain	O	Posttranslational modification, protein turnover, chaperones ;
PROKKA_00160	COG1190	Lysyl-tRNA synthetase (class II)	J	Translation, ribosomal structure and biogenesis ;
PROKKA_00166	COG1744	Uncharacterized ABC-type transport system, periplasmic component/surface lipoprotein	R	General function prediction only ;
PROKKA_00167	COG0353	Recombinational DNA repair protein (RecF pathway)	L	Replication, recombination and repair ;
PROKKA_00168	COG0718	Uncharacterized protein conserved in bacteria	S	Function unknown;
PROKKA_00169	COG2812	DNA polymerase III, gamma/tau subunits	L	Replication, recombination and repair ;
PROKKA_00171	COG2255	Holliday junction resolvasome, helicase subunit	L	Replication, recombination and repair ;
PROKKA_00172	COG0632	Holliday junction resolvasome, DNA-binding subunit	L	Replication, recombination and repair ;
PROKKA_00174	COG0064	Asp-tRNAAsn/Glu-tRNAGln amidotransferase B subunit (PET112 homolog)	J	Translation, ribosomal structure and biogenesis ;
PROKKA_00175	COG0154	Asp-tRNAAsn/Glu-tRNAGln amidotransferase A subunit and related amidases	J	Translation, ribosomal structure and biogenesis ;
PROKKA_00176	COG0721	Asp-tRNAAsn/Glu-tRNAGln amidotransferase C subunit	J	Translation, ribosomal structure and biogenesis ;
PROKKA_00177	COG0692	Uracil DNA glycosylase	L	Replication, recombination and repair ;
PROKKA_00179	COG0305	Replicative DNA helicase	L	Replication, recombination and repair ;
PROKKA_00180	COG0359	Ribosomal protein L9	J	Translation, ribosomal structure and biogenesis ;
PROKKA_00181	COG0238	Ribosomal protein S18	J	Translation, ribosomal structure and biogenesis ;
PROKKA_00182	COG0629	Single-stranded DNA-binding protein	L	Replication, recombination and repair ;
PROKKA_00183	COG0360	Ribosomal protein S6	J	Translation, ribosomal structure and biogenesis ;
PROKKA_00184	COG2502	Asparagine synthetase A	E	Amino acid transport and metabolism ;
PROKKA_00185	COG1488	Nicotinic acid phosphoribosyltransferase	H	Coenzyme transport and metabolism ;
PROKKA_00188	COG0561	Predicted hydrolases of the HAD superfamily	R	General function prediction only ;
PROKKA_00189	COG0280	Phosphotransacetylase	C	Energy production and conversion ;
PROKKA_00190	COG1161	Predicted GTPases	R	General function prediction only ;
PROKKA_00191	COG1284	Uncharacterized conserved protein	S	Function unknown;
PROKKA_00192	COG0335	Ribosomal protein L19	J	Translation, ribosomal structure and biogenesis ;
PROKKA_00193	COG0336	tRNA-(guanine-N1)-methyltransferase	J	Translation, ribosomal structure and biogenesis ;
PROKKA_00194	COG0228	Ribosomal protein S16	J	Translation, ribosomal structure and biogenesis ;
PROKKA_00195	COG0203	Ribosomal protein L17	J	Translation, ribosomal structure and biogenesis ;
PROKKA_00196	COG0202	DNA-directed RNA polymerase, alpha subunit/40 kD subunit	K	Transcription ;
PROKKA_00197	COG0100	Ribosomal protein S11	J	Translation, ribosomal structure and biogenesis ;
PROKKA_00198	COG0099	Ribosomal protein S13	J	Translation, ribosomal structure and biogenesis ;
PROKKA_00199	COG0361	Translation initiation factor 1 (IF-1)	J	Translation, ribosomal structure and biogenesis ;
PROKKA_00200	COG1131	ABC-type multidrug transport system, ATPase component	V	Defense mechanisms ;
PROKKA_00201	COG1277	ABC-type transport system involved in multi-copper enzyme maturation, permease component	R	General function prediction only ;
PROKKA_00202	COG0466	ATP-dependent Lon protease, bacterial type	O	Posttranslational modification, protein turnover, chaperones ;
PROKKA_00203	COG0544	FKBP-type peptidyl-prolyl cis-trans isomerase (trigger factor)	O	Posttranslational modification, protein turnover, chaperones ;
PROKKA_00205	COG0735	Fe2+/Zn2+ uptake regulation proteins	P	Inorganic ion transport and metabolism ;
PROKKA_00206	COG0648	Endonuclease IV	L	Replication, recombination and repair ;
PROKKA_00207	COG0211	Ribosomal protein L27	J	Translation, ribosomal structure and biogenesis ;
PROKKA_00208	COG2868	Predicted ribosomal protein	J	Translation, ribosomal structure and biogenesis ;
PROKKA_00209	COG0261	Ribosomal protein L21	J	Translation, ribosomal structure and biogenesis ;
PROKKA_00210	COG1132	ABC-type multidrug transport system, ATPase and permease components	V	Defense mechanisms ;
PROKKA_00211	COG1132	ABC-type multidrug transport system, ATPase and permease components	V	Defense mechanisms ;
PROKKA_00212	COG1132	ABC-type multidrug transport system, ATPase and permease components	V	Defense mechanisms ;
PROKKA_00214	COG4668	Mannitol/fructose-specific phosphotransferase system, IIA domain	G	Carbohydrate transport and metabolism ;
PROKKA_00215	COG0246	Mannitol-1-phosphate/altronate dehydrogenases	G	Carbohydrate transport and metabolism ;
PROKKA_00216	COG0656	Aldo/keto reductases, related to diketogulonate reductase	R	General function prediction only ;
PROKKA_00217	COG2213	Phosphotransferase system, mannitol-specific IIBC component	G	Carbohydrate transport and metabolism ;
PROKKA_00218	COG0072	Phenylalanyl-tRNA synthetase beta subunit	J	Translation, ribosomal structure and biogenesis ;
PROKKA_00219	COG0016	Phenylalanyl-tRNA synthetase alpha subunit	J	Translation, ribosomal structure and biogenesis ;
PROKKA_00220	COG4508	Uncharacterized protein conserved in bacteria	S	Function unknown;
PROKKA_00221	COG0292	Ribosomal protein L20	J	Translation, ribosomal structure and biogenesis ;
PROKKA_00222	COG0291	Ribosomal protein L35	J	Translation, ribosomal structure and biogenesis ;
PROKKA_00223	COG0290	Translation initiation factor 3 (IF-3)	J	Translation, ribosomal structure and biogenesis ;
PROKKA_00224	COG1739	Uncharacterized conserved protein	S	Function unknown;
PROKKA_00225	COG0322	Nuclease subunit of the excinuclease complex	L	Replication, recombination and repair ;
PROKKA_00226	COG1420	Transcriptional regulator of heat shock gene	K	Transcription ;
PROKKA_00227	COG1154	Deoxyxylulose-5-phosphate synthase	I	Lipid transport and metabolism ;
PROKKA_00230	COG1554	Trehalose and maltose hydrolases (possible phosphorylases)	G	Carbohydrate transport and metabolism ;
PROKKA_00231	COG0637	Predicted phosphatase/phosphohexomutase	R	General function prediction only ;
PROKKA_00234	COG1039	Ribonuclease HIII	L	Replication, recombination and repair ;
PROKKA_00237	COG1466	DNA polymerase III, delta subunit	L	Replication, recombination and repair ;
PROKKA_00239	COG0525	Valyl-tRNA synthetase	J	Translation, ribosomal structure and biogenesis ;
PROKKA_00240	COG0218	Predicted GTPase	R	General function prediction only ;
PROKKA_00241	COG3763	Uncharacterized protein conserved in bacteria	S	Function unknown;
PROKKA_00242	COG0021	Transketolase	G	Carbohydrate transport and metabolism ;
PROKKA_00243	COG0463	Glycosyltransferases involved in cell wall biogenesis	M	Cell wall/membrane/envelope biogenesis ;
PROKKA_00244	COG0389	Nucleotidyltransferase/DNA polymerase involved in DNA repair	L	Replication, recombination and repair ;
PROKKA_00245	COG1658	Small primase-like proteins (Toprim domain)	L	Replication, recombination and repair ;
PROKKA_00246	COG0462	Phosphoribosylpyrophosphate synthetase	E	Amino acid transport and metabolism ;
PROKKA_00247	COG0101	Pseudouridylate synthase	J	Translation, ribosomal structure and biogenesis ;
PROKKA_00248	COG0619	ABC-type cobalt transport system, permease component CbiQ and related transporters	P	Inorganic ion transport and metabolism ;
PROKKA_00249	COG1122	ABC-type cobalt transport system, ATPase component	P	Inorganic ion transport and metabolism ;
PROKKA_00250	COG1122	ABC-type cobalt transport system, ATPase component	P	Inorganic ion transport and metabolism ;
PROKKA_00251	COG0696	Phosphoglyceromutase	G	Carbohydrate transport and metabolism ;
PROKKA_00252	COG0149	Triosephosphate isomerase	G	Carbohydrate transport and metabolism ;
PROKKA_00253	COG1109	Phosphomannomutase	G	Carbohydrate transport and metabolism ;
PROKKA_00254	COG0295	Cytidine deaminase	F	Nucleotide transport and metabolism ;
PROKKA_00255	COG0213	Thymidine phosphorylase	F	Nucleotide transport and metabolism ;
PROKKA_00256	COG0274	Deoxyribose-phosphate aldolase	F	Nucleotide transport and metabolism ;
PROKKA_00257	COG0813	Purine-nucleoside phosphorylase	F	Nucleotide transport and metabolism ;
PROKKA_00258	COG1079	Uncharacterized ABC-type transport system, permease component	R	General function prediction only ;
PROKKA_00259	COG4603	ABC-type uncharacterized transport system, permease component	R	General function prediction only ;
PROKKA_00260	COG3845	ABC-type uncharacterized transport systems, ATPase components	R	General function prediction only ;
PROKKA_00269	COG0587	DNA polymerase III, alpha subunit	L	Replication, recombination and repair ;
PROKKA_00270	COG0258	5'-3' exonuclease (including N-terminal domain of PolI)	L	Replication, recombination and repair ;
PROKKA_00271	COG0266	Formamidopyrimidine-DNA glycosylase	L	Replication, recombination and repair ;
PROKKA_00272	COG0237	Dephospho-CoA kinase	H	Coenzyme transport and metabolism ;
PROKKA_00273	COG3611	Replication initiation/membrane attachment protein	L	Replication, recombination and repair ;
PROKKA_00275	COG0474	Cation transport ATPase	P	Inorganic ion transport and metabolism ;
PROKKA_00276	COG0017	Aspartyl/asparaginyl-tRNA synthetases	J	Translation, ribosomal structure and biogenesis ;
PROKKA_00277	COG0558	Phosphatidylglycerophosphate synthase	I	Lipid transport and metabolism ;
PROKKA_00279	COG1211	4-diphosphocytidyl-2-methyl-D-erithritol synthase	I	Lipid transport and metabolism ;
PROKKA_00283	COG3839	Adhesin P1 precursor	G	Carbohydrate transport and metabolism ;
PROKKA_00284	COG1175	ABC-type sugar transport systems, permease components	G	Carbohydrate transport and metabolism ;
PROKKA_00285	COG0395	ABC-type sugar transport system, permease component	G	Carbohydrate transport and metabolism ;
PROKKA_00286	COG0264	Translation elongation factor Ts	J	Translation, ribosomal structure and biogenesis ;
PROKKA_00289	COG0274	Deoxyribose-phosphate aldolase	F	Nucleotide transport and metabolism ;
PROKKA_00290	COG3328	Transposase and inactivated derivatives	L	Replication, recombination and repair ;
PROKKA_00299	COG0656	Aldo/keto reductases, related to diketogulonate reductase	R	General function prediction only ;
PROKKA_00300	COG1881	Phospholipid-binding protein	R	General function prediction only ;
PROKKA_00301	COG1881	Phospholipid-binding protein	R	General function prediction only ;
PROKKA_00302	COG0495	Leucyl-tRNA synthetase	J	Translation, ribosomal structure and biogenesis ;
PROKKA_00303	COG0569	K+ transport systems, NAD-binding component	P	Inorganic ion transport and metabolism ;
PROKKA_00309	COG1160	Predicted GTPases	R	General function prediction only ;
PROKKA_00310	COG0283	Cytidylate kinase	F	Nucleotide transport and metabolism ;
PROKKA_00312	COG0693	Putative intracellular protease/amidase	R	General function prediction only ;
PROKKA_00332	COG1131	ABC-type multidrug transport system, ATPase component	V	Defense mechanisms ;
PROKKA_00333	COG1277	ABC-type transport system involved in multi-copper enzyme maturation, permease component	R	General function prediction only ;
PROKKA_00345	COG0576	Molecular chaperone GrpE (heat shock protein)	O	Posttranslational modification, protein turnover, chaperones ;
PROKKA_00346	COG0484	DnaJ-class molecular chaperone with C-terminal Zn finger domain	O	Posttranslational modification, protein turnover, chaperones ;
PROKKA_00347	COG0596	Predicted hydrolases or acyltransferases (alpha/beta hydrolase superfamily)	R	General function prediction only ;
PROKKA_00348	COG1196	Chromosome segregation ATPases	D	Cell cycle control, cell division, chromosome partitioning ;
PROKKA_00350	COG1196	Chromosome segregation ATPases	D	Cell cycle control, cell division, chromosome partitioning ;
PROKKA_00351	COG0492	Thioredoxin reductase	O	Posttranslational modification, protein turnover, chaperones ;
PROKKA_00352	COG2235	Arginine deiminase	E	Amino acid transport and metabolism ;
PROKKA_00353	COG2235	Arginine deiminase	E	Amino acid transport and metabolism ;
PROKKA_00359	COG1196	Chromosome segregation ATPases	D	Cell cycle control, cell division, chromosome partitioning ;
PROKKA_00360	COG1196	Chromosome segregation ATPases	D	Cell cycle control, cell division, chromosome partitioning ;
PROKKA_00361	COG1196	Chromosome segregation ATPases	D	Cell cycle control, cell division, chromosome partitioning ;
PROKKA_00362	COG0716	Flavodoxins	C	Energy production and conversion ;
PROKKA_00363	COG0060	Isoleucyl-tRNA synthetase	J	Translation, ribosomal structure and biogenesis ;
PROKKA_00364	COG0219	Predicted rRNA methylase (SpoU class)	J	Translation, ribosomal structure and biogenesis ;
PROKKA_00365	COG0220	Predicted S-adenosylmethionine-dependent methyltransferase	R	General function prediction only ;
PROKKA_00370	COG0531	Amino acid transporters	E	Amino acid transport and metabolism ;
PROKKA_00371	COG0126	3-phosphoglycerate kinase	G	Carbohydrate transport and metabolism ;
PROKKA_00372	COG0057	Glyceraldehyde-3-phosphate dehydrogenase/erythrose-4-phosphate dehydrogenase	G	Carbohydrate transport and metabolism ;
PROKKA_00373	COG1307	Uncharacterized protein conserved in bacteria	S	Function unknown;
PROKKA_00377	COG4866	Uncharacterized conserved protein	S	Function unknown;
PROKKA_00378	COG0355	F0F1-type ATP synthase, epsilon subunit (mitochondrial delta subunit)	C	Energy production and conversion ;
PROKKA_00379	COG0055	F0F1-type ATP synthase, beta subunit	C	Energy production and conversion ;
PROKKA_00380	COG0224	F0F1-type ATP synthase, gamma subunit	C	Energy production and conversion ;
PROKKA_00381	COG0056	F0F1-type ATP synthase, alpha subunit	C	Energy production and conversion ;
PROKKA_00382	COG0712	F0F1-type ATP synthase, delta subunit (mitochondrial oligomycin sensitivity protein)	C	Energy production and conversion ;
PROKKA_00383	COG0711	F0F1-type ATP synthase, subunit b	C	Energy production and conversion ;
PROKKA_00384	COG0636	F0F1-type ATP synthase, subunit c/Archaeal/vacuolar-type H+-ATPase, subunit K	C	Energy production and conversion ;
PROKKA_00385	COG0356	F0F1-type ATP synthase, subunit a	C	Energy production and conversion ;
PROKKA_00388	COG0035	Uracil phosphoribosyltransferase	F	Nucleotide transport and metabolism ;
PROKKA_00389	COG0821	Enzyme involved in the deoxyxylulose pathway of isoprenoid biosynthesis	I	Lipid transport and metabolism ;
PROKKA_00390	COG0103	Ribosomal protein S9	J	Translation, ribosomal structure and biogenesis ;
PROKKA_00391	COG0102	Ribosomal protein L13	J	Translation, ribosomal structure and biogenesis ;
PROKKA_00392	COG4870	Cysteine protease	O	Posttranslational modification, protein turnover, chaperones ;
PROKKA_00394	COG5421	Transposase	L	Replication, recombination and repair ;
PROKKA_00396	COG0112	Glycine/serine hydroxymethyltransferase	E	Amino acid transport and metabolism ;
PROKKA_00397	COG0162	Tyrosyl-tRNA synthetase	J	Translation, ribosomal structure and biogenesis ;
PROKKA_00398	COG0541	Signal recognition particle GTPase	U	Intracellular trafficking, secretion, and vesicular transport ;
PROKKA_00399	COG1764	Predicted redox protein, regulator of disulfide bond formation	O	Posttranslational modification, protein turnover, chaperones ;
PROKKA_00401	COG1131	ABC-type multidrug transport system, ATPase component	V	Defense mechanisms ;
PROKKA_00402	COG0484	DnaJ-class molecular chaperone with C-terminal Zn finger domain	O	Posttranslational modification, protein turnover, chaperones ;
PROKKA_00403	COG0240	Glycerol-3-phosphate dehydrogenase	C	Energy production and conversion ;
PROKKA_00404	COG0484	DnaJ-class molecular chaperone with C-terminal Zn finger domain	O	Posttranslational modification, protein turnover, chaperones ;
PROKKA_00405	COG0719	ABC-type transport system involved in Fe-S cluster assembly, permease component	O	Posttranslational modification, protein turnover, chaperones ;
PROKKA_00406	COG0822	NifU homolog involved in Fe-S cluster formation	C	Energy production and conversion ;
PROKKA_00407	COG0520	Selenocysteine lyase	E	Amino acid transport and metabolism ;
PROKKA_00408	COG0719	ABC-type transport system involved in Fe-S cluster assembly, permease component	O	Posttranslational modification, protein turnover, chaperones ;
PROKKA_00409	COG0396	ABC-type transport system involved in Fe-S cluster assembly, ATPase component	O	Posttranslational modification, protein turnover, chaperones ;
PROKKA_00410	COG1451	Predicted metal-dependent hydrolase	R	General function prediction only ;
PROKKA_00411	COG0221	Inorganic pyrophosphatase	C	Energy production and conversion ;
PROKKA_00415	COG0561	Predicted hydrolases of the HAD superfamily	R	General function prediction only ;
PROKKA_00419	COG0431	Predicted flavoprotein	R	General function prediction only ;
PROKKA_00421	COG2226	Methylase involved in ubiquinone/menaquinone biosynthesis	H	Coenzyme transport and metabolism ;
PROKKA_00423	COG0534	Na+-driven multidrug efflux pump	V	Defense mechanisms ;
PROKKA_00425	COG0484	DnaJ-class molecular chaperone with C-terminal Zn finger domain	O	Posttranslational modification, protein turnover, chaperones ;
PROKKA_00426	COG0484	DnaJ-class molecular chaperone with C-terminal Zn finger domain	O	Posttranslational modification, protein turnover, chaperones ;
PROKKA_00432	COG0057	Glyceraldehyde-3-phosphate dehydrogenase/erythrose-4-phosphate dehydrogenase	G	Carbohydrate transport and metabolism ;
PROKKA_00436	COG0017	Aspartyl/asparaginyl-tRNA synthetases	J	Translation, ribosomal structure and biogenesis ;
PROKKA_00446	COG0481	Membrane GTPase LepA	M	Cell wall/membrane/envelope biogenesis ;
PROKKA_00450	COG0561	Predicted hydrolases of the HAD superfamily	R	General function prediction only ;
PROKKA_00451	COG0561	Predicted hydrolases of the HAD superfamily	R	General function prediction only ;
PROKKA_00452	COG0180	Tryptophanyl-tRNA synthetase	J	Translation, ribosomal structure and biogenesis ;
PROKKA_00453	COG1393	Arsenate reductase and related proteins, glutaredoxin family	P	Inorganic ion transport and metabolism ;
PROKKA_00454	COG0061	Predicted sugar kinase	G	Carbohydrate transport and metabolism ;
PROKKA_00456	COG0531	Amino acid transporters	E	Amino acid transport and metabolism ;
PROKKA_00457	COG1970	Large-conductance mechanosensitive channel	M	Cell wall/membrane/envelope biogenesis ;
PROKKA_00459	COG0392	Predicted integral membrane protein	S	Function unknown;
PROKKA_00460	COG0443	Molecular chaperone	O	Posttranslational modification, protein turnover, chaperones ;
PROKKA_00461	COG0286	Type I restriction-modification system methyltransferase subunit	V	Defense mechanisms ;
PROKKA_00466	COG0522	Ribosomal protein S4 and related proteins	J	Translation, ribosomal structure and biogenesis ;
PROKKA_00467	COG0048	Ribosomal protein S12	J	Translation, ribosomal structure and biogenesis ;
PROKKA_00468	COG0049	Ribosomal protein S7	J	Translation, ribosomal structure and biogenesis ;
PROKKA_00469	COG0480	Translation elongation factors (GTPases)	J	Translation, ribosomal structure and biogenesis ;
PROKKA_00472	COG0227	Ribosomal protein L28	J	Translation, ribosomal structure and biogenesis ;
PROKKA_00473	COG1765	Predicted redox protein, regulator of disulfide bond formation	O	Posttranslational modification, protein turnover, chaperones ;
PROKKA_00475	COG0313	Predicted methyltransferases	R	General function prediction only ;
PROKKA_00476	COG2256	ATPase related to the helicase subunit of the Holliday junction resolvase	L	Replication, recombination and repair ;
PROKKA_00478	COG1182	Acyl carrier protein phosphodiesterase	I	Lipid transport and metabolism ;
PROKKA_00479	COG0052	Ribosomal protein S2	J	Translation, ribosomal structure and biogenesis ;
PROKKA_00481	COG4166	ABC-type oligopeptide transport system, periplasmic component	E	Amino acid transport and metabolism ;
PROKKA_00482	COG0601	ABC-type dipeptide/oligopeptide/nickel transport systems, permease components	P	Inorganic ion transport and metabolism ;
PROKKA_00483	COG1173	ABC-type dipeptide/oligopeptide/nickel transport systems, permease components	P	Inorganic ion transport and metabolism ;
PROKKA_00484	COG0444	ABC-type dipeptide/oligopeptide/nickel transport system, ATPase component	P	Inorganic ion transport and metabolism ;
PROKKA_00485	COG4608	ABC-type oligopeptide transport system, ATPase component	E	Amino acid transport and metabolism ;
PROKKA_00487	COG0601	ABC-type dipeptide/oligopeptide/nickel transport systems, permease components	P	Inorganic ion transport and metabolism ;
PROKKA_00488	COG1173	ABC-type dipeptide/oligopeptide/nickel transport systems, permease components	P	Inorganic ion transport and metabolism ;
PROKKA_00489	COG0444	ABC-type dipeptide/oligopeptide/nickel transport system, ATPase component	P	Inorganic ion transport and metabolism ;
PROKKA_00490	COG4608	ABC-type oligopeptide transport system, ATPase component	E	Amino acid transport and metabolism ;
PROKKA_00493	COG0231	Translation elongation factor P (EF-P)/translation initiation factor 5A (eIF-5A)	J	Translation, ribosomal structure and biogenesis ;
PROKKA_00495	COG0781	Transcription termination factor	K	Transcription ;
PROKKA_00497	COG0537	Diadenosine tetraphosphate (Ap4A) hydrolase and other HIT family hydrolases	R	General function prediction only ;
PROKKA_00501	COG0143	Methionyl-tRNA synthetase	J	Translation, ribosomal structure and biogenesis ;
PROKKA_00502	COG0427	Acetyl-CoA hydrolase	C	Energy production and conversion ;
PROKKA_00503	COG1692	Uncharacterized protein conserved in bacteria	S	Function unknown;
PROKKA_00504	COG0212	5-formyltetrahydrofolate cyclo-ligase	H	Coenzyme transport and metabolism ;
PROKKA_00505	COG0210	Superfamily I DNA and RNA helicases	L	Replication, recombination and repair ;
PROKKA_00510	COG0694	Thioredoxin-like proteins and domains	O	Posttranslational modification, protein turnover, chaperones ;
PROKKA_00511	COG0344	Predicted membrane protein	S	Function unknown;
PROKKA_00512	COG0327	Uncharacterized conserved protein	S	Function unknown;
PROKKA_00513	COG2384	Predicted SAM-dependent methyltransferase	R	General function prediction only ;
PROKKA_00514	COG0568	DNA-directed RNA polymerase, sigma subunit (sigma70/sigma32)	K	Transcription ;
PROKKA_00515	COG0358	DNA primase (bacterial type)	L	Replication, recombination and repair ;
PROKKA_00516	COG0423	Glycyl-tRNA synthetase (class II)	J	Translation, ribosomal structure and biogenesis ;
PROKKA_00517	COG1381	Recombinational DNA repair protein (RecF pathway)	L	Replication, recombination and repair ;
PROKKA_00518	COG1159	GTPase	R	General function prediction only ;
PROKKA_00519	COG0319	Predicted metal-dependent hydrolase	R	General function prediction only ;
PROKKA_00521	COG2274	ABC-type bacteriocin/lantibiotic exporters, contain an N-terminal double-glycine peptidase domain	V	Defense mechanisms ;
PROKKA_00523	COG0206	Cell division GTPase	D	Cell cycle control, cell division, chromosome partitioning ;
PROKKA_00525	COG0275	Predicted S-adenosylmethionine-dependent methyltransferase involved in cell envelope biogenesis	M	Cell wall/membrane/envelope biogenesis ;
PROKKA_00526	COG2001	Uncharacterized protein conserved in bacteria	S	Function unknown;
PROKKA_00527	COG1386	Predicted transcriptional regulator containing the HTH domain	K	Transcription ;
PROKKA_00528	COG0262	Dihydrofolate reductase	H	Coenzyme transport and metabolism ;
PROKKA_00529	COG0204	1-acyl-sn-glycerol-3-phosphate acyltransferase	I	Lipid transport and metabolism ;
PROKKA_00530	COG0736	Phosphopantetheinyl transferase (holo-ACP synthase)	I	Lipid transport and metabolism ;
PROKKA_00532	COG1039	Ribonuclease HIII	L	Replication, recombination and repair ;
PROKKA_00535	COG1704	Uncharacterized conserved protein	S	Function unknown;
PROKKA_00539	COG0775	Nucleoside phosphorylase	F	Nucleotide transport and metabolism ;
PROKKA_00540	COG1057	Nicotinic acid mononucleotide adenylyltransferase	H	Coenzyme transport and metabolism ;
PROKKA_00541	COG1161	Predicted GTPases	R	General function prediction only ;
PROKKA_00542	COG0188	Type IIA topoisomerase (DNA gyrase/topo II, topoisomerase IV), A subunit	L	Replication, recombination and repair ;
PROKKA_00543	COG0187	Type IIA topoisomerase (DNA gyrase/topo II, topoisomerase IV), B subunit	L	Replication, recombination and repair ;
PROKKA_00544	COG0776	Bacterial nucleoid DNA-binding protein	L	Replication, recombination and repair ;
PROKKA_00547	COG1476	Predicted transcriptional regulators	K	Transcription ;
PROKKA_00548	COG0286	Type I restriction-modification system methyltransferase subunit	V	Defense mechanisms ;
PROKKA_00550	COG0610	Type I site-specific restriction-modification system, R (restriction) subunit and related helicases	V	Defense mechanisms ;
PROKKA_00563	COG1039	Ribonuclease HIII	L	Replication, recombination and repair ;
PROKKA_00566	COG0148	Enolase	G	Carbohydrate transport and metabolism ;
PROKKA_00567	COG0513	Superfamily II DNA and RNA helicases	J	Translation, ribosomal structure and biogenesis ;
PROKKA_00568	COG5271	AAA ATPase containing von Willebrand factor type A (vWA) domain	R	General function prediction only ;
PROKKA_00572	COG0301	Thiamine biosynthesis ATP pyrophosphatase	H	Coenzyme transport and metabolism ;
PROKKA_00573	COG0618	Exopolyphosphatase-related proteins	R	General function prediction only ;
PROKKA_00574	COG0566	rRNA methylases	J	Translation, ribosomal structure and biogenesis ;
PROKKA_00575	COG0564	Pseudouridylate synthases, 23S RNA-specific	J	Translation, ribosomal structure and biogenesis ;
PROKKA_00577	COG1461	Predicted kinase related to dihydroxyacetone kinase	R	General function prediction only ;
PROKKA_00578	COG0416	Fatty acid/phospholipid biosynthesis enzyme	I	Lipid transport and metabolism ;
PROKKA_00579	COG0571	dsRNA-specific ribonuclease	K	Transcription ;
PROKKA_00580	COG0542	ATPases with chaperone activity, ATP-binding subunit	O	Posttranslational modification, protein turnover, chaperones ;
PROKKA_00581	COG1428	Deoxynucleoside kinases	F	Nucleotide transport and metabolism ;
PROKKA_00582	COG1428	Deoxynucleoside kinases	F	Nucleotide transport and metabolism ;
PROKKA_00583	COG1253	Hemolysins and related proteins containing CBS domains	R	General function prediction only ;
PROKKA_00584	COG0168	Trk-type K+ transport systems, membrane components	P	Inorganic ion transport and metabolism ;
PROKKA_00585	COG0282	Acetate kinase	C	Energy production and conversion ;
PROKKA_00586	COG0446	Uncharacterized NAD(FAD)-dependent dehydrogenases	R	General function prediction only ;
PROKKA_00587	COG1071	Pyruvate/2-oxoglutarate dehydrogenase complex, dehydrogenase (E1) component, eukaryotic type, alpha subunit	C	Energy production and conversion ;
PROKKA_00588	COG0022	Pyruvate/2-oxoglutarate dehydrogenase complex, dehydrogenase (E1) component, eukaryotic type, beta subunit	C	Energy production and conversion ;
PROKKA_00589	COG0508	Pyruvate/2-oxoglutarate dehydrogenase complex, dihydrolipoamide acyltransferase (E2) component, and related enzymes	C	Energy production and conversion ;
PROKKA_00590	COG1249	Pyruvate/2-oxoglutarate dehydrogenase complex, dihydrolipoamide dehydrogenase (E3) component, and related enzymes	C	Energy production and conversion ;
PROKKA_00591	COG0095	Lipoate-protein ligase A	H	Coenzyme transport and metabolism ;
PROKKA_00592	COG0205	6-phosphofructokinase	G	Carbohydrate transport and metabolism ;
PROKKA_00593	COG0469	Pyruvate kinase	G	Carbohydrate transport and metabolism ;
PROKKA_00594	COG0234	Co-chaperonin GroES (HSP10)	O	Posttranslational modification, protein turnover, chaperones ;
PROKKA_00595	COG0459	Chaperonin GroEL (HSP60 family)	O	Posttranslational modification, protein turnover, chaperones ;
PROKKA_00596	COG0229	Conserved domain frequently associated with peptide methionine sulfoxide reductase	O	Posttranslational modification, protein turnover, chaperones ;
PROKKA_00598	COG0468	RecA/RadA recombinase	L	Replication, recombination and repair ;
PROKKA_00599	COG1418	Predicted HD superfamily hydrolase	R	General function prediction only ;
PROKKA_00601	COG3842	ABC-type spermidine/putrescine transport systems, ATPase components	E	Amino acid transport and metabolism ;
PROKKA_00602	COG1176	ABC-type spermidine/putrescine transport system, permease component I	E	Amino acid transport and metabolism ;
PROKKA_00603	COG1177	ABC-type spermidine/putrescine transport system, permease component II	E	Amino acid transport and metabolism ;
PROKKA_00604	COG0687	Spermidine/putrescine-binding periplasmic protein	E	Amino acid transport and metabolism ;
PROKKA_00605	COG0533	Metal-dependent proteases with possible chaperone activity	O	Posttranslational modification, protein turnover, chaperones ;
PROKKA_00606	COG0192	S-adenosylmethionine synthetase	H	Coenzyme transport and metabolism ;
PROKKA_00609	COG0492	Thioredoxin reductase	O	Posttranslational modification, protein turnover, chaperones ;
PROKKA_00610	COG1481	Uncharacterized protein conserved in bacteria	S	Function unknown;
PROKKA_00612	COG0557	Exoribonuclease R	K	Transcription ;
PROKKA_00613	COG1624	Uncharacterized conserved protein	S	Function unknown;
PROKKA_00617	COG0260	Leucyl aminopeptidase	E	Amino acid transport and metabolism ;
PROKKA_00620	COG0536	Predicted GTPase	R	General function prediction only ;
PROKKA_00622	COG0572	Uridine kinase	F	Nucleotide transport and metabolism ;
PROKKA_00623	COG2235	Arginine deiminase	E	Amino acid transport and metabolism ;
PROKKA_00625	COG0267	Ribosomal protein L33	J	Translation, ribosomal structure and biogenesis ;
PROKKA_00626	COG0006	Xaa-Pro aminopeptidase	E	Amino acid transport and metabolism ;
PROKKA_00628	COG0691	tmRNA-binding protein	O	Posttranslational modification, protein turnover, chaperones ;
PROKKA_00629	COG3579	Aminopeptidase C	E	Amino acid transport and metabolism ;
PROKKA_00630	COG3579	Aminopeptidase C	E	Amino acid transport and metabolism ;
PROKKA_00635	COG0610	Type I site-specific restriction-modification system, R (restriction) subunit and related helicases	V	Defense mechanisms ;
PROKKA_00636	COG0732	Restriction endonuclease S subunits	V	Defense mechanisms ;
PROKKA_00637	COG0286	Type I restriction-modification system methyltransferase subunit	V	Defense mechanisms ;
PROKKA_00638	COG0464	ATPases of the AAA+ class	O	Posttranslational modification, protein turnover, chaperones ;
PROKKA_00641	COG0215	Cysteinyl-tRNA synthetase	J	Translation, ribosomal structure and biogenesis ;
PROKKA_00642	COG0566	rRNA methylases	J	Translation, ribosomal structure and biogenesis ;
PROKKA_00644	COG3512	Uncharacterized protein conserved in bacteria	S	Function unknown;
PROKKA_00645	COG1518	Uncharacterized protein predicted to be involved in DNA repair	L	Replication, recombination and repair ;
PROKKA_00646	COG3513	Uncharacterized protein conserved in bacteria	S	Function unknown;
PROKKA_00647	COG3513	Uncharacterized protein conserved in bacteria	S	Function unknown;
PROKKA_00650	COG1482	Phosphomannose isomerase	G	Carbohydrate transport and metabolism ;
PROKKA_00652	COG1299	Phosphotransferase system, fructose-specific IIC component	G	Carbohydrate transport and metabolism ;
PROKKA_00653	COG0037	Predicted ATPase of the PP-loop superfamily implicated in cell cycle control	D	Cell cycle control, cell division, chromosome partitioning ;
PROKKA_00654	COG0193	Peptidyl-tRNA hydrolase	J	Translation, ribosomal structure and biogenesis ;
PROKKA_00655	COG0081	Ribosomal protein L1	J	Translation, ribosomal structure and biogenesis ;
PROKKA_00656	COG0080	Ribosomal protein L11	J	Translation, ribosomal structure and biogenesis ;
PROKKA_00657	COG1435	Thymidine kinase	F	Nucleotide transport and metabolism ;
PROKKA_00658	COG0012	Predicted GTPase, probable translation factor	J	Translation, ribosomal structure and biogenesis ;
PROKKA_00659	COG0191	Fructose/tagatose bisphosphate aldolase	G	Carbohydrate transport and metabolism ;
PROKKA_00660	COG3343	DNA-directed RNA polymerase, delta subunit	K	Transcription ;
PROKKA_00663	COG0055	F0F1-type ATP synthase, beta subunit	C	Energy production and conversion ;
PROKKA_00664	COG0056	F0F1-type ATP synthase, alpha subunit	C	Energy production and conversion ;
PROKKA_00671	COG3328	Transposase and inactivated derivatives	L	Replication, recombination and repair ;
PROKKA_00672	COG0690	Preprotein translocase subunit SecE	U	Intracellular trafficking, secretion, and vesicular transport ;
PROKKA_00673	COG0250	Transcription antiterminator	K	Transcription ;
PROKKA_00676	COG0357	Predicted S-adenosylmethionine-dependent methyltransferase involved in bacterial cell division	M	Cell wall/membrane/envelope biogenesis ;
PROKKA_00677	COG0445	NAD/FAD-utilizing enzyme apparently involved in cell division	D	Cell cycle control, cell division, chromosome partitioning ;
PROKKA_00679	COG0242	N-formylmethionyl-tRNA deformylase	J	Translation, ribosomal structure and biogenesis ;
PROKKA_00680	COG0194	Guanylate kinase	F	Nucleotide transport and metabolism ;
PROKKA_00681	COG0631	Serine/threonine protein phosphatase	T	Signal transduction mechanisms ;
PROKKA_00682	COG0515	Serine/threonine protein kinase	L	Replication, recombination and repair ;
PROKKA_00683	COG1162	Predicted GTPases	R	General function prediction only ;
PROKKA_00684	COG0166	Glucose-6-phosphate isomerase	G	Carbohydrate transport and metabolism ;
PROKKA_00685	COG0036	Pentose-5-phosphate-3-epimerase	G	Carbohydrate transport and metabolism ;
PROKKA_00686	COG0550	Topoisomerase IA	L	Replication, recombination and repair ;
PROKKA_00687	COG3118	Thioredoxin domain-containing protein	O	Posttranslational modification, protein turnover, chaperones ;
PROKKA_00688	COG0534	Na+-driven multidrug efflux pump	V	Defense mechanisms ;
PROKKA_00690	COG0484	DnaJ-class molecular chaperone with C-terminal Zn finger domain	O	Posttranslational modification, protein turnover, chaperones ;
PROKKA_00692	COG0333	Ribosomal protein L32	J	Translation, ribosomal structure and biogenesis ;
PROKKA_00693	COG0222	Ribosomal protein L7/L12	J	Translation, ribosomal structure and biogenesis ;
PROKKA_00694	COG0244	Ribosomal protein L10	J	Translation, ribosomal structure and biogenesis ;
PROKKA_00697	COG0776	Bacterial nucleoid DNA-binding protein	L	Replication, recombination and repair ;
PROKKA_00698	COG3331	Penicillin-binding protein-related factor A, putative recombinase	R	General function prediction only ;
PROKKA_00700	COG0698	Ribose 5-phosphate isomerase RpiB	G	Carbohydrate transport and metabolism ;
PROKKA_00701	COG0009	Putative translation factor (SUA5)	J	Translation, ribosomal structure and biogenesis ;
PROKKA_00702	COG2890	Methylase of polypeptide chain release factors	J	Translation, ribosomal structure and biogenesis ;
PROKKA_00703	COG0216	Protein chain release factor A	J	Translation, ribosomal structure and biogenesis ;
PROKKA_00704	COG0254	Ribosomal protein L31	J	Translation, ribosomal structure and biogenesis ;
PROKKA_00705	COG1012	NAD-dependent aldehyde dehydrogenases	C	Energy production and conversion ;
PROKKA_00706	COG1263	Phosphotransferase system IIC components, glucose/maltose/N-acetylglucosamine-specific	G	Carbohydrate transport and metabolism ;
PROKKA_00714	COG0217	Uncharacterized conserved protein	S	Function unknown;
PROKKA_00716	COG2731	Beta-galactosidase, beta subunit	G	Carbohydrate transport and metabolism ;
PROKKA_00718	COG0223	Methionyl-tRNA formyltransferase	J	Translation, ribosomal structure and biogenesis ;
PROKKA_00721	COG0826	Collagenase and related proteases	O	Posttranslational modification, protein turnover, chaperones ;
PROKKA_00722	COG0826	Collagenase and related proteases	O	Posttranslational modification, protein turnover, chaperones ;
PROKKA_00723	COG4122	Predicted O-methyltransferase	R	General function prediction only ;
PROKKA_00724	COG0816	Predicted endonuclease involved in recombination (possible Holliday junction resolvase in Mycoplasmas and B. subtilis)	L	Replication, recombination and repair ;
PROKKA_00725	COG0013	Alanyl-tRNA synthetase	J	Translation, ribosomal structure and biogenesis ;
PROKKA_00727	COG0427	Acetyl-CoA hydrolase	C	Energy production and conversion ;
PROKKA_00728	COG0482	Predicted tRNA(5-methylaminomethyl-2-thiouridylate) methyltransferase, contains the PP-loop ATPase domain	J	Translation, ribosomal structure and biogenesis ;
PROKKA_00729	COG0130	Pseudouridine synthase	J	Translation, ribosomal structure and biogenesis ;
PROKKA_00732	COG3328	Transposase and inactivated derivatives	L	Replication, recombination and repair ;
PROKKA_00734	COG0858	Ribosome-binding factor A	J	Translation, ribosomal structure and biogenesis ;
PROKKA_00735	COG0532	Translation initiation factor 2 (IF-2; GTPase)	J	Translation, ribosomal structure and biogenesis ;
PROKKA_00737	COG0195	Transcription elongation factor	K	Transcription ;
PROKKA_00739	COG1404	Subtilisin-like serine proteases	O	Posttranslational modification, protein turnover, chaperones ;
PROKKA_00750	COG0756	dUTPase	F	Nucleotide transport and metabolism ;
PROKKA_00751	COG1214	Inactive homolog of metal-dependent proteases, putative molecular chaperone	O	Posttranslational modification, protein turnover, chaperones ;
PROKKA_00752	COG0564	Pseudouridylate synthases, 23S RNA-specific	J	Translation, ribosomal structure and biogenesis ;
PROKKA_00753	COG0597	Lipoprotein signal peptidase	U	Intracellular trafficking, secretion, and vesicular transport ;
PROKKA_00754	COG0693	Putative intracellular protease/amidase	R	General function prediction only ;
PROKKA_00755	COG0596	Predicted hydrolases or acyltransferases (alpha/beta hydrolase superfamily)	R	General function prediction only ;
PROKKA_00756	COG0085	DNA-directed RNA polymerase, beta subunit/140 kD subunit	K	Transcription ;
PROKKA_00757	COG0086	DNA-directed RNA polymerase, beta' subunit/160 kD subunit	K	Transcription ;
PROKKA_00765	COG3638	ABC-type phosphate/phosphonate transport system, ATPase component	P	Inorganic ion transport and metabolism ;
PROKKA_00766	COG3639	ABC-type phosphate/phosphonate transport system, permease component	P	Inorganic ion transport and metabolism ;
PROKKA_00768	COG0442	Prolyl-tRNA synthetase	J	Translation, ribosomal structure and biogenesis ;
PROKKA_00772	COG0236	Acyl carrier protein	Q	Secondary metabolites biosynthesis, transport and catabolism ;
PROKKA_00774	COG0050	GTPases - translation elongation factors	J	Translation, ribosomal structure and biogenesis ;
PROKKA_00775	COG1307	Uncharacterized protein conserved in bacteria	S	Function unknown;
PROKKA_00776	COG0073	EMAP domain	R	General function prediction only ;
PROKKA_00777	COG0534	Na+-driven multidrug efflux pump	V	Defense mechanisms ;
PROKKA_00780	COG0783	DNA-binding ferritin-like protein (oxidative damage protectant)	P	Inorganic ion transport and metabolism ;
PROKKA_00781	COG0531	Amino acid transporters	E	Amino acid transport and metabolism ;
PROKKA_00787	COG0782	Transcription elongation factor	K	Transcription ;
PROKKA_00790	COG0503	Adenine/guanine phosphoribosyltransferases and related PRPP-binding proteins	F	Nucleotide transport and metabolism ;
PROKKA_00792	COG0504	CTP synthase (UTP-ammonia lyase)	F	Nucleotide transport and metabolism ;
PROKKA_00793	COG0317	Guanosine polyphosphate pyrophosphohydrolases/synthetases	K	Transcription ;
PROKKA_00794	COG0173	Aspartyl-tRNA synthetase	J	Translation, ribosomal structure and biogenesis ;
PROKKA_00795	COG0124	Histidyl-tRNA synthetase	J	Translation, ribosomal structure and biogenesis ;
PROKKA_00801	COG0510	Predicted choline kinase involved in LPS biosynthesis	M	Cell wall/membrane/envelope biogenesis ;
PROKKA_00804	COG0441	Threonyl-tRNA synthetase	J	Translation, ribosomal structure and biogenesis ;
PROKKA_00807	COG2739	Uncharacterized protein conserved in bacteria	S	Function unknown;
PROKKA_00808	COG0552	Signal recognition particle GTPase	U	Intracellular trafficking, secretion, and vesicular transport ;
PROKKA_00809	COG1196	Chromosome segregation ATPases	D	Cell cycle control, cell division, chromosome partitioning ;
PROKKA_00810	COG0635	Coproporphyrinogen III oxidase and related Fe-S oxidoreductases	H	Coenzyme transport and metabolism ;
PROKKA_00811	COG0324	tRNA delta(2)-isopentenylpyrophosphate transferase	J	Translation, ribosomal structure and biogenesis ;
