# Supplementary material for: Drug sensitivity and genome-wide analysis of two strains of Mycoplasma gallisepticum with different biofilm intensity
Source: Front Microbiol. 2023 Aug 9;14:1196747. doi: 10.3389/fmicb.2023.1196747 (PMC10445764; doi:10.3389/fmicb.2023.1196747)
Supplement: Supplementary file 5 [file Table_5.XLS]

Database	Number of Unigenes	Percentage(%)
Annotated in CDD	814	54.09
Annotated in COG	648	43.06
Annotated in NR	1452	96.48
Annotated in PFAM	663	44.05
Annotated in Swissprot	792	52.62
Annotated in TrEMBL	1450	96.35
Annotated in GO	947	62.92
Annotated in KEGG	502	33.36
Annotated in at least one database	1454	96.61
Annotated in all database	333	22.13
Total Unigenes	1505	100
