# Supplementary material for: Drug sensitivity and genome-wide analysis of two strains of Mycoplasma gallisepticum with different biofilm intensity
Source: Front Microbiol. 2023 Aug 9;14:1196747. doi: 10.3389/fmicb.2023.1196747 (PMC10445764; doi:10.3389/fmicb.2023.1196747)
Supplement: Supplementary file 6 [file Table_6.XLS]

Database	Number of Unigenes	Percentage(%)
Annotated in CDD	578	74.68
Annotated in COG	487	62.92
Annotated in NR	759	98.06
Annotated in PFAM	534	68.99
Annotated in Swissprot	545	70.41
Annotated in TrEMBL	757	97.8
Annotated in GO	537	69.38
Annotated in KEGG	302	39.02
Annotated in at least one database	759	98.06
Annotated in all database	273	35.27
Total Unigenes	774	100
